# Supplementary material for: Integrative Transcriptomics and Metabolomics Analysis of Body Color Formation in the Leopard Coral Grouper (Plectropomus leopardus)
Source: Frontiers journal article supplement (doi:10.3389/fmars.2021.726102), 2021-08-10
Supplement: Data_Sheet_1.xlsx [file Data_Sheet_1.xlsx]

## Sheet: Table S1
Table S1 DEGs between ZB vs ZR group
#ID	pValue	FDR	log2FC	regulated	Pfam_annotation	Swissprot_annotation	TrEMBL_annotation	nr_annotation
Dxb_GLEAN_10000025	2.74717e-07	2.04238e-05	1.16316	up	--	--	Uncharacterized protein OS=Danio rerio OX=7955 PE=4 SV=1	PREDICTED: uncharacterized protein LOC105407099 [Aquila chrysaetos canadensis]
Dxb_GLEAN_10000026	5.92084e-06	0.00028939	-1.50504	down	Immunoglobulin V-set domain;; Immunoglobulin domain;; Immunoglobulin domain	Ig kappa chain V-III region PC 7175 OS=Mus musculus OX=10090 PE=1 SV=1	Uncharacterized protein OS=Anabas testudineus OX=64144 PE=4 SV=1	immunoglobulin light chain, partial [Acipenser baerii]
Dxb_GLEAN_10000030	3.74497e-07	2.65209e-05	1.05227	up	--	--	Uncharacterized protein OS=Danio rerio OX=7955 PE=4 SV=1	collagen alpha-1(I) chain-like, partial [Pipra filicauda]
Dxb_GLEAN_10000034	1.69149e-05	0.000668571	1.43135	up	Immunoglobulin V-set domain	Immunoglobulin kappa variable 4-1 OS=Homo sapiens OX=9606 GN=IGKV4-1 PE=1 SV=1	Uncharacterized protein OS=Seriola dumerili OX=41447 PE=4 SV=1	immunoglobulin light chain precursor [Seriola quinqueradiata]
Dxb_GLEAN_10000076	4.75179e-14	1.15255e-11	1.28493	up	--	--	Uncharacterized protein OS=Astatotilapia calliptera OX=8154 PE=4 SV=1	collagen alpha-1(I) chain [Labeo rohita]
Dxb_GLEAN_10000108	8.85223e-05	0.00255228	-1.22037	down	--	Stonustoxin subunit beta OS=Synanceia horrida OX=13279 PE=1 SV=3	Uncharacterized protein OS=Gasterosteus aculeatus OX=69293 PE=4 SV=1	keratin, type I cytoskeletal 13-like [Perca flavescens]
Dxb_GLEAN_10000368	8.91888e-05	0.00256165	-1.0757	down	SPRY domain;; B-box zinc finger	Zinc-binding protein A33 OS=Pleurodeles waltl OX=8319 PE=1 SV=2	Uncharacterized protein OS=Oreochromis niloticus OX=8128 PE=4 SV=1	PREDICTED: tripartite motif-containing protein 35-like [Poecilia reticulata]
Dxb_GLEAN_10000374	2.18348e-06	0.000124613	-1.37796	down	SPRY-associated domain;; SPRY domain	Zinc-binding protein A33 OS=Pleurodeles waltl OX=8319 PE=1 SV=2	Uncharacterized protein OS=Oreochromis niloticus OX=8128 PE=4 SV=1	tripartite motif-containing protein 35-like [Oreochromis niloticus]
Dxb_GLEAN_10000413	8.20211e-06	0.000372725	-1.26223	down	SPRY-associated domain;; SPRY domain	Zinc-binding protein A33 OS=Pleurodeles waltl OX=8319 PE=1 SV=2	Uncharacterized protein OS=Maylandia zebra OX=106582 PE=4 SV=1	PREDICTED: nuclear factor 7, brain-like isoform X3 [Lates calcarifer]
Dxb_GLEAN_10000490	5.26678e-15	1.45518e-12	1.90502	up	Globin	Hemoglobin subunit alpha-2 OS=Gobionotothen gibberifrons OX=36202 GN=hba2 PE=1 SV=1	Uncharacterized protein OS=Anabas testudineus OX=64144 PE=3 SV=1	hemoglobin embryonic subunit alpha-like [Anabas testudineus]
Dxb_GLEAN_10000506	8.18641e-19	3.52998e-16	-2.42645	down	Class I Histocompatibility antigen, domains alpha 1 and 2	H-2 class I histocompatibility antigen, K-K alpha chain OS=Mus musculus OX=10090 GN=H2-K1 PE=1 SV=1	Major histocompatibility class I receptor OS=Sander vitreus OX=283036 PE=2 SV=1	major histocompatibility class I receptor [Sander vitreus]
Dxb_GLEAN_10000518	4.85741e-07	3.34608e-05	-1.17385	down	--	Interferon-induced very large GTPase 1 OS=Mus musculus OX=10090 GN=Gvin1 PE=1 SV=1	Uncharacterized protein OS=Perca flavescens OX=8167 GN=EPR50_G00198880 PE=4 SV=1	hypothetical protein EPR50_G00198880 [Perca flavescens]
Dxb_GLEAN_10000524	2.75941e-08	2.58665e-06	1.80925	up	--	--	HAMP1 OS=Epinephelus coioides OX=94232 PE=2 SV=1	HAMP1 [Epinephelus coioides]
Dxb_GLEAN_10000548	9.00731e-13	1.78345e-10	1.58192	up	Globin	Hemoglobin subunit beta OS=Cottoperca gobio OX=56716 GN=hbb PE=1 SV=2	Uncharacterized protein OS=Perca flavescens OX=8167 GN=EPR50_G00159310 PE=4 SV=1	RecName: Full=Hemoglobin subunit beta; AltName: Full=Beta-globin; AltName: Full=Hemoglobin beta chain
Dxb_GLEAN_10000638	1.98307e-14	5.06309e-12	1.84493	up	Lectin C-type domain;; Sushi repeat (SCR repeat)	L-selectin OS=Homo sapiens OX=9606 GN=SELL PE=1 SV=2	Uncharacterized protein OS=Perca flavescens OX=8167 GN=EPR50_G00098070 PE=4 SV=1	E-selectin-like [Perca flavescens]
Dxb_GLEAN_10000762	5.89687e-06	0.000288947	-1.11856	down	Cytochrome P450	Cytochrome P450 2K1 OS=Oncorhynchus mykiss OX=8022 GN=cyp2k1 PE=2 SV=1	Uncharacterized protein OS=Mastacembelus armatus OX=205130 PE=3 SV=1	PREDICTED: cytochrome P450 2K1-like [Lates calcarifer]
Dxb_GLEAN_10000766	1.07176e-07	8.96397e-06	1.25986	up	Immunoglobulin domain;; Immunoglobulin V-set domain;; Immunoglobulin domain;; Immunoglobulin I-set domain;; Immunoglobulin domain	--	Uncharacterized protein OS=Astatotilapia calliptera OX=8154 PE=4 SV=1	uncharacterized protein LOC114551247 [Perca flavescens]
Dxb_GLEAN_10000992	1.39481e-30	2.08191e-27	1.97068	up	Zinc finger C-x8-C-x5-C-x3-H type (and similar);; Zinc finger domain;; CCCH-type zinc finger	mRNA decay activator protein ZFP36L2-A OS=Xenopus laevis OX=8355 GN=zfp36l2-A PE=1 SV=1	Uncharacterized protein OS=Perca flavescens OX=8167 GN=EPR50_G00026170 PE=4 SV=1	mRNA decay activator protein ZFP36-like [Perca flavescens]
Dxb_GLEAN_10000996	1.33776e-05	0.000551123	1.38115	up	Class I Histocompatibility antigen, domains alpha 1 and 2;; Immunoglobulin C1-set domain	Major histocompatibility complex class I-related gene protein OS=Rattus norvegicus OX=10116 GN=Mr1 PE=2 SV=2	Uncharacterized protein OS=Seriola dumerili OX=41447 PE=3 SV=1	major histocompatibility complex class I-related gene protein-like [Anabas testudineus]
Dxb_GLEAN_10001013	3.29564e-05	0.00114809	1.37866	up	Beta/Gamma crystallin;; Interleukin-4 inducing immunoglobulin-binding domain	Gamma-crystallin S-1 OS=Chiloscyllium indicum OX=443761 GN=GS-1 PE=2 SV=2	Uncharacterized protein OS=Seriola lalandi dorsalis OX=1841481 PE=3 SV=1	gamma-crystallin M2-like isoform X1 [Seriola lalandi dorsalis]
Dxb_GLEAN_10001039	2.19876e-05	0.000818903	1.34492	up	SERTA motif	SERTA domain-containing protein 2 OS=Homo sapiens OX=9606 GN=SERTAD2 PE=1 SV=1	SERTA domain-containing protein 2 OS=Larimichthys crocea OX=215358 GN=EH28_08582 PE=4 SV=1	SERTA domain-containing protein 2 [Larimichthys crocea]
Dxb_GLEAN_10001043	0.000448019	0.00920268	-1.03496	down	50S ribosome-binding GTPase;; AIG1 family;; Septin	--	Uncharacterized protein OS=Perca flavescens OX=8167 GN=EPR50_G00173380 PE=4 SV=1	hypothetical protein EPR50_G00173380 [Perca flavescens]
Dxb_GLEAN_10001161	6.87518e-07	4.52224e-05	-1.54514	down	SPRY-associated domain;; SPRY domain;; Zinc finger, C3HC4 type (RING finger);; zinc finger of C3HC4-type, RING;; RING-type zinc-finger;; Zinc finger, C3HC4 type (RING finger);; B-box zinc finger;; Zinc finger, C3HC4 type (RING finger);; U-box domain	E3 ubiquitin-protein ligase TRIM39 OS=Rattus norvegicus OX=10116 GN=Trim39 PE=3 SV=1	Bloodthirsty-1 OS=Oplegnathus fasciatus OX=163134 GN=bty PE=2 SV=1	PREDICTED: E3 ubiquitin-protein ligase TRIM21-like [Lates calcarifer]
Dxb_GLEAN_10001206	7.35869e-06	0.000339971	1.12071	up	Ankyrin repeats (3 copies);; Ankyrin repeat;; Ankyrin repeats (many copies);; Ankyrin repeat;; Ankyrin repeats (many copies)	Ankyrin repeat domain-containing protein SOWAHC OS=Mus musculus OX=10090 GN=Sowahc PE=1 SV=2	Uncharacterized protein OS=Seriola lalandi dorsalis OX=1841481 PE=4 SV=1	ankyrin repeat domain-containing protein SOWAHC-like [Seriola dumerili]
Dxb_GLEAN_10001239	1.10393e-06	6.86562e-05	1.36144	up	Lipocalin / cytosolic fatty-acid binding protein family	Retinoid-binding protein 7 OS=Mus musculus OX=10090 GN=Rbp7 PE=1 SV=1	Centromere protein S OS=Gasterosteus aculeatus OX=69293 GN=CENPS PE=3 SV=1	retinoid-binding protein 7-like isoform X1 [Perca flavescens]
Dxb_GLEAN_10001241	7.04056e-06	0.000329988	-1.22743	down	Cytochrome P450	Cytochrome P450 2K3 OS=Oncorhynchus mykiss OX=8022 GN=cyp2k3 PE=2 SV=1	Uncharacterized protein OS=Fundulus heteroclitus OX=8078 PE=3 SV=1	cytochrome P450 2K1-like [Parambassis ranga]
Dxb_GLEAN_10001300	5.21486e-05	0.00166979	-1.1967	down	Immunoglobulin domain;; Immunoglobulin domain;; Immunoglobulin I-set domain	--	CD48 antigen OS=Larimichthys crocea OX=215358 GN=EH28_00523 PE=4 SV=1	CD48 antigen isoform X2 [Larimichthys crocea]
Dxb_GLEAN_10001324	0.000412871	0.00875558	-1.17322	down	Cytochrome P450	Cytochrome P450 2K1 OS=Oncorhynchus mykiss OX=8022 GN=cyp2k1 PE=2 SV=1	Uncharacterized protein OS=Seriola dumerili OX=41447 PE=3 SV=1	LOW QUALITY PROTEIN: uncharacterized protein LOC111227275 [Seriola dumerili]
Dxb_GLEAN_10001439	4.9247e-09	5.42948e-07	-1.58314	down	Zona pellucida-like domain	Alpha-tectorin OS=Mus musculus OX=10090 GN=Tecta PE=1 SV=2	Uncharacterized protein OS=Oreochromis niloticus OX=8128 PE=4 SV=1	Alpha-tectorin [Dicentrarchus labrax]
Dxb_GLEAN_10001450	1.92629e-20	9.11652e-18	1.64676	up	Jun-like transcription factor;; bZIP transcription factor;; bZIP Maf transcription factor;; Basic region leucine zipper	Transcription factor jun-B OS=Cyprinus carpio OX=7962 GN=junb PE=2 SV=1	Uncharacterized protein OS=Amphiprion ocellaris OX=80972 PE=3 SV=1	PREDICTED: transcription factor jun-B-like [Lates calcarifer]
Dxb_GLEAN_10001519	1.35012e-08	1.37161e-06	-1.38104	down	Immunoglobulin C1-set domain	Beta-2-microglobulin OS=Danio rerio OX=7955 GN=b2m PE=1 SV=1	Beta-2-microglobulin OS=Amphiprion ocellaris OX=80972 PE=3 SV=1	beta-2-microglobulin-like [Perca flavescens]
Dxb_GLEAN_10001717	5.89066e-81	5.71512e-77	2.76774	up	Immediate early response protein (IER)	Immediate early response gene 2 protein OS=Danio rerio OX=7955 GN=ier2 PE=1 SV=1	Immediate early response 2 protein OS=Larimichthys crocea OX=215358 GN=EH28_03812 PE=4 SV=1	immediate early response gene 2 protein [Anabas testudineus]
Dxb_GLEAN_10001726	0.000107743	0.00299282	-1.14048	down	SPRY-associated domain;; B-box zinc finger;; SPRY domain	Tripartite motif-containing protein 16 OS=Mus musculus OX=10090 GN=Trim16 PE=1 SV=2	Uncharacterized protein OS=Maylandia zebra OX=106582 PE=4 SV=1	tripartite motif-containing protein 16-like [Larimichthys crocea]
Dxb_GLEAN_10001759	3.36864e-13	7.18298e-11	1.54854	up	Globin	Hemoglobin subunit alpha OS=Pseudotrematomus bernacchii OX=40690 GN=hba PE=1 SV=1	Uncharacterized protein OS=Perca flavescens OX=8167 GN=EPR50_G00216320 PE=4 SV=1	hemoglobin subunit alpha-like [Perca flavescens]
Dxb_GLEAN_10002031	6.87479e-06	0.000322998	-1.12404	down	Small cytokines (intecrine/chemokine), interleukin-8 like	C-C motif chemokine 20 OS=Mus musculus OX=10090 GN=Ccl20 PE=1 SV=1	CCL20-like 2 protein OS=Epinephelus coioides OX=94232 PE=2 SV=1	CCL20-like 2 protein [Epinephelus coioides]
Dxb_GLEAN_10002159	6.73024e-17	2.4184e-14	2.76084	up	--	--	Uncharacterized protein OS=Larimichthys crocea OX=215358 GN=EH28_03267 PE=4 SV=1	syncytin-A-like [Astyanax mexicanus]
Dxb_GLEAN_10002190	1.96056e-08	1.89144e-06	1.86606	up	Interleukin-1 / 18	Interleukin-1 beta OS=Oncorhynchus mykiss OX=8022 GN=il1b PE=2 SV=1	Interleukin-1 (Fragment) OS=Epinephelus coioides OX=94232 PE=2 SV=1	interleukin-1 beta, partial [Epinephelus coioides]
Dxb_GLEAN_10002249	1.02952e-16	3.50767e-14	-2.13464	down	Fibrinogen beta and gamma chains, C-terminal globular domain	Microfibril-associated glycoprotein 4 OS=Bos taurus OX=9913 GN=MFAP4 PE=1 SV=2	Uncharacterized protein OS=Astatotilapia calliptera OX=8154 GN=MFAP4 PE=4 SV=1	microfibril-associated glycoprotein 4-like isoform X2 [Astatotilapia calliptera]
Dxb_GLEAN_10002278	3.16765e-09	3.86573e-07	-1.73939	down	Galactose binding lectin domain	L-rhamnose-binding lectin SML OS=Scomberomorus niphonius OX=321164 PE=1 SV=1	L-rhamnose-binding lectin CSL2 OS=Sparus aurata OX=8175 GN=CSL2 PE=2 SV=1	L-rhamnose-binding lectin CSL2 [Sparus aurata]
Dxb_GLEAN_10002342	2.48514e-06	0.000139431	1.37347	up	--	--	Uncharacterized protein OS=Larimichthys crocea OX=215358 GN=EH28_01512 PE=4 SV=1	hypothetical protein EPR50_G00183840 [Perca flavescens]
Dxb_GLEAN_10002404	8.24978e-06	0.000374016	1.48385	up	SPRY-associated domain;; SPRY domain	Zinc-binding protein A33 OS=Pleurodeles waltl OX=8319 PE=1 SV=2	Uncharacterized protein OS=Astatotilapia calliptera OX=8154 PE=4 SV=1	tripartite motif-containing protein 35-like [Astatotilapia calliptera]
Dxb_GLEAN_10002498	0.000247814	0.00588565	-1.12788	down	7 transmembrane receptor (rhodopsin family);; Serpentine type 7TM GPCR chemoreceptor Srsx	C-C chemokine receptor type 6 OS=Mus musculus OX=10090 GN=Ccr6 PE=1 SV=1	C-C motif chemokine receptor 6 OS=Monopterus albus OX=43700 GN=CCR6 PE=3 SV=1	C-C chemokine receptor type 6-like [Monopterus albus]
Dxb_GLEAN_10002524	0.000319644	0.00717038	-1.1861	down	HD domain	Deoxynucleoside triphosphate triphosphohydrolase SAMHD1 OS=Mus musculus OX=10090 GN=Samhd1 PE=1 SV=3	Uncharacterized protein OS=Mastacembelus armatus OX=205130 PE=4 SV=1	PREDICTED: deoxynucleoside triphosphate triphosphohydrolase SAMHD1-like [Takifugu rubripes]
Dxb_GLEAN_10002531	1.74968e-08	1.73218e-06	-1.21461	down	SPRY-associated domain;; SPRY domain;; RING-type zinc-finger;; zinc finger of C3HC4-type, RING;; Zinc finger, C3HC4 type (RING finger);; B-box zinc finger;; Zinc finger, C3HC4 type (RING finger)	E3 ubiquitin-protein ligase TRIM21 OS=Homo sapiens OX=9606 GN=TRIM21 PE=1 SV=1	Uncharacterized protein OS=Mastacembelus armatus OX=205130 PE=4 SV=1	E3 ubiquitin-protein ligase TRIM21-like [Perca flavescens]
Dxb_GLEAN_10002603	1.43947e-13	3.21052e-11	1.88632	up	Myc amino-terminal region;; Helix-loop-helix DNA-binding domain;; Myc leucine zipper domain	Transcriptional regulator Myc-1 OS=Cyprinus carpio OX=7962 GN=myca PE=3 SV=1	Transcriptional regulator OS=Seriola dumerili OX=41447 PE=4 SV=1	transcriptional regulator Myc-like isoform X2 [Seriola dumerili]
Dxb_GLEAN_10002614	1.9283e-06	0.000111677	1.14529	up	--	--	Uncharacterized protein III (Fragment) OS=Epinephelus bruneus OX=323802 PE=2 SV=1	hypothetical protein EPR50_G00058680 [Perca flavescens]
Dxb_GLEAN_10002663	5.15367e-07	3.47228e-05	1.09516	up	FERM central domain	Unconventional myosin-X OS=Mus musculus OX=10090 GN=Myo10 PE=1 SV=1	Uncharacterized protein OS=Seriola dumerili OX=41447 PE=3 SV=1	PREDICTED: unconventional myosin-X [Lates calcarifer]
Dxb_GLEAN_10002665	3.3178e-07	2.38439e-05	1.47043	up	--	Myosin regulatory light chain 2, skeletal muscle isoform OS=Gallus gallus OX=9031 GN=MYLPF PE=1 SV=2	Myosin light chain 2 OS=Katsuwonus pelamis OX=8226 GN=mlc2 PE=2 SV=1	myosin light chain 2 [Katsuwonus pelamis]
Dxb_GLEAN_10002676	1.22667e-28	1.48764e-25	2.44342	up	--	--	Uncharacterized protein OS=Maylandia zebra OX=106582 PE=4 SV=1	putative selection and upkeep of intraepithelial T-cells protein 1 homolog isoform X3 [Maylandia zebra]
Dxb_GLEAN_10002717	2.01741e-10	3.05827e-08	1.04117	up	PHR domain;; BTB/POZ domain;; BTB And C-terminal Kelch	BTB/POZ domain-containing protein 6 OS=Mus musculus OX=10090 GN=Btbd6 PE=2 SV=2	Uncharacterized protein OS=Amphiprion percula OX=161767 PE=4 SV=1	BTB/POZ domain-containing protein 6-B [Amphiprion ocellaris]
Dxb_GLEAN_10002747	6.04901e-10	8.32447e-08	-1.06206	down	Cytidylyltransferase	N-acylneuraminate cytidylyltransferase OS=Oncorhynchus mykiss OX=8022 GN=cmas PE=2 SV=1	N-acylneuraminate cytidylyltransferase OS=Larimichthys crocea OX=215358 GN=EH28_09287 PE=4 SV=1	N-acylneuraminate cytidylyltransferase [Larimichthys crocea]
Dxb_GLEAN_10002859	8.08599e-08	6.90378e-06	1.75697	up	--	--	Uncharacterized protein OS=Danio rerio OX=7955 PE=4 SV=1	PREDICTED: uncharacterized protein LOC107664801 [Sinocyclocheilus anshuiensis]
Dxb_GLEAN_10002879	7.67308e-10	1.04851e-07	1.6282	up	--	Sialate O-acetylesterase OS=Mus musculus OX=10090 GN=Siae PE=1 SV=3	Sialic acid acetylesterase OS=Anabas testudineus OX=64144 PE=4 SV=1	sialate O-acetylesterase [Anabas testudineus]
Dxb_GLEAN_10002916	8.04807e-14	1.8815e-11	2.48349	up	Somatomedin B domain	Proteoglycan 4 OS=Homo sapiens OX=9606 GN=PRG4 PE=1 SV=3	Proteoglycan 4a OS=Seriola dumerili OX=41447 PE=4 SV=1	PREDICTED: proteoglycan 4-like [Lates calcarifer]
Dxb_GLEAN_10002931	4.60108e-09	5.16017e-07	1.95045	up	Interferon-induced transmembrane protein	Interferon-induced transmembrane protein 5 OS=Homo sapiens OX=9606 GN=IFITM5 PE=1 SV=1	Uncharacterized protein OS=Anabas testudineus OX=64144 PE=4 SV=1	dispanin subfamily A member 2b-like [Perca flavescens]
Dxb_GLEAN_10002992	9.18103e-06	0.000406549	-1.2733	down	Immunoglobulin V-set domain;; Immunoglobulin domain;; Immunoglobulin domain;; Immunoglobulin I-set domain;; CD47 immunoglobulin-like domain	V-set domain-containing T-cell activation inhibitor 1 OS=Homo sapiens OX=9606 GN=VTCN1 PE=1 SV=1	Uncharacterized protein OS=Mastacembelus armatus OX=205130 PE=4 SV=1	PREDICTED: V-set domain-containing T-cell activation inhibitor 1 [Lates calcarifer]
Dxb_GLEAN_10003078	2.98166e-08	2.742e-06	-1.44041	down	Sodium:neurotransmitter symporter family	Sodium- and chloride-dependent GABA transporter 2 OS=Homo sapiens OX=9606 GN=SLC6A13 PE=1 SV=3	Transporter OS=Seriola dumerili OX=41447 PE=3 SV=1	PREDICTED: sodium- and chloride-dependent GABA transporter 2-like isoform X1 [Lates calcarifer]
Dxb_GLEAN_10003162	9.38774e-32	1.656e-28	2.10282	up	Ring finger domain;; RING-type zinc-finger;; zinc-RING finger domain	E3 ubiquitin-protein ligase RNF183 OS=Bos taurus OX=9913 GN=RNF183 PE=2 SV=1	Uncharacterized protein OS=Perca flavescens OX=8167 GN=EPR50_G00197030 PE=4 SV=1	RING finger protein 223-like [Perca flavescens]
Dxb_GLEAN_10003334	6.68506e-08	5.79093e-06	-1.34175	down	--	Up-regulator of cell proliferation OS=Bos taurus OX=9913 GN=URGCP PE=2 SV=2	Uncharacterized protein OS=Oreochromis niloticus OX=8128 PE=4 SV=1	PREDICTED: uncharacterized protein LOC103373985 [Stegastes partitus]
Dxb_GLEAN_10003369	1.40237e-40	4.53525e-37	3.61222	up	--	--	Sb:cb1058 OS=Anabas testudineus OX=64144 PE=4 SV=1	uncharacterized protein LOC113157100 [Anabas testudineus]
Dxb_GLEAN_10003557	7.23933e-06	0.000336863	-1.2982	down	SecA DEAD-like domain;; DEAD/DEAH box helicase	Protein translocase subunit SecA OS=Oceanobacillus iheyensis (strain DSM 14371 / CIP 107618 / JCM 11309 / KCTC 3954 / HTE831) OX=221109 GN=secA PE=3 SV=1	Protein translocase subunit SecA OS=Larimichthys crocea OX=215358 GN=EH28_09557 PE=4 SV=1	uncharacterized protein LOC113123269 [Mastacembelus armatus]
Dxb_GLEAN_10003608	9.13994e-09	9.79842e-07	1.00275	up	Transglutaminase family;; Transglutaminase-like superfamily;; Transglutaminase family, C-terminal ig like domain	Coagulation factor XIII A chain OS=Mus musculus OX=10090 GN=F13a1 PE=1 SV=3	Uncharacterized protein OS=Stegastes partitus OX=144197 PE=4 SV=1	coagulation factor XIII A chain [Perca flavescens]
Dxb_GLEAN_10003640	4.14558e-11	6.99485e-09	-1.34778	down	--	--	Uncharacterized protein OS=Maylandia zebra OX=106582 PE=4 SV=1	PREDICTED: probable E3 ubiquitin-protein ligase ARI7 [Haplochromis burtoni]
Dxb_GLEAN_10003644	1.25635e-06	7.73911e-05	-1.09671	down	IBR domain, a half RING-finger domain	--	Uncharacterized protein OS=Seriola dumerili OX=41447 PE=4 SV=1	probable E3 ubiquitin-protein ligase ARI5 [Seriola dumerili]
Dxb_GLEAN_10003660	5.38033e-08	4.81106e-06	1.18779	up	Phosphotyrosine interaction domain (PTB/PID)	Low density lipoprotein receptor adapter protein 1 OS=Rattus norvegicus OX=10116 GN=Ldlrap1 PE=1 SV=2	Uncharacterized protein OS=Seriola lalandi dorsalis OX=1841481 PE=4 SV=1	low density lipoprotein receptor adapter protein 1-like [Seriola lalandi dorsalis]
Dxb_GLEAN_10003884	6.39371e-07	4.21985e-05	1.64855	up	PTN/MK heparin-binding protein family, C-terminal domain;; PTN/MK heparin-binding protein family, N-terminal domain	Pleiotrophin OS=Rattus norvegicus OX=10116 GN=Ptn PE=1 SV=1	pleiotrophin isoform X1 OS=Salmo salar OX=8030 GN=ptn PE=4 SV=1	pleiotrophin [Labrus bergylta]
Dxb_GLEAN_10004010	6.2706e-05	0.00193441	1.08377	up	Protein kinase domain;; Protein tyrosine kinase	Mitogen-activated protein kinase 12 OS=Danio rerio OX=7955 GN=mapk12 PE=2 SV=1	Mitogen-activated protein kinase OS=Stegastes partitus OX=144197 PE=4 SV=1	mitogen-activated protein kinase 12 isoform X1 [Larimichthys crocea]
Dxb_GLEAN_10004098	6.73466e-12	1.19889e-09	1.21958	up	Protein kinase domain;; Protein tyrosine kinase;; Kinase-like;; Lipopolysaccharide kinase (Kdo/WaaP) family	Serine/threonine-protein kinase pim-3 OS=Coturnix japonica OX=93934 GN=PIM3 PE=2 SV=1	Serine/threonine-protein kinase OS=Anabas testudineus OX=64144 PE=3 SV=1	serine/threonine-protein kinase pim-3 [Anabas testudineus]
Dxb_GLEAN_10004177	2.63916e-10	3.90918e-08	1.12009	up	Transmembrane amino acid transporter protein	Sodium-coupled neutral amino acid transporter 2 OS=Danio rerio OX=7955 GN=slc38a2 PE=3 SV=1	Neutral amino acid transporter 2 OS=Siniperca chuatsi OX=119488 PE=2 SV=1	neutral amino acid transporter 2 [Siniperca chuatsi]
Dxb_GLEAN_10004206	7.26595e-05	0.00218587	-1.00979	down	Neurexophilin	NXPE family member 3 OS=Danio rerio OX=7955 GN=nxpe3 PE=2 SV=1	Uncharacterized protein OS=Perca flavescens OX=8167 GN=EPR50_G00233740 PE=4 SV=1	hypothetical protein EPR50_G00233740 [Perca flavescens]
Dxb_GLEAN_10004401	2.84953e-15	8.1312e-13	2.23943	up	--	--	Uncharacterized protein OS=Perca flavescens OX=8167 GN=EPR50_G00226200 PE=4 SV=1	TNFAIP3-interacting protein 1-like [Larimichthys crocea]
Dxb_GLEAN_10004459	2.96979e-09	3.64721e-07	1.28037	up	Lectin C-type domain;; Fibronectin type II domain;; UL45 protein, carbohydrate-binding C-type lectin-like;; Extracellular link domain;; Ricin-type beta-trefoil lectin domain;; Chordopoxvirus A33R protein	Macrophage mannose receptor 1 OS=Homo sapiens OX=9606 GN=MRC1 PE=1 SV=1	Macrophage mannose receptor 1 OS=Dicentrarchus labrax OX=13489 GN=MRC1 PE=4 SV=1	macrophage mannose receptor 1 [Perca flavescens]
Dxb_GLEAN_10004512	2.07405e-21	1.0877e-18	1.80219	up	Cysteine/serine-rich nuclear protein N-terminus	Cysteine/serine-rich nuclear protein 1 OS=Homo sapiens OX=9606 GN=CSRNP1 PE=1 SV=2	Uncharacterized protein OS=Perca flavescens OX=8167 GN=EPR50_G00224970 PE=4 SV=1	cysteine/serine-rich nuclear protein 1-like [Perca flavescens]
Dxb_GLEAN_10004681	5.87437e-05	0.00185043	1.27203	up	Protein kinase domain;; Protein tyrosine kinase	Serine/threonine-protein kinase MAK OS=Homo sapiens OX=9606 GN=MAK PE=1 SV=2	Uncharacterized protein OS=Perca flavescens OX=8167 GN=EPR50_G00223050 PE=4 SV=1	hypothetical protein EPR50_G00223050 [Perca flavescens]
Dxb_GLEAN_10004707	0.000436996	0.0090496	1.17008	up	Myosin head (motor domain);; Myosin tail;; Myosin N-terminal SH3-like domain	Myosin-6 OS=Mus musculus OX=10090 GN=Myh6 PE=1 SV=2	Slow myosin heavy chain 1 OS=Amphiprion percula OX=161767 PE=3 SV=1	myosin-6-like [Amphiprion ocellaris]
Dxb_GLEAN_10005088	5.69987e-08	5.00454e-06	-1.13982	down	Transforming growth factor beta like domain	Growth/differentiation factor 6 OS=Homo sapiens OX=9606 GN=GDF6 PE=1 SV=1	Gonadal soma-derived factor OS=Epinephelus akaara OX=215347 PE=2 SV=1	gonadal soma-derived factor [Epinephelus akaara]
Dxb_GLEAN_10005129	4.1688e-28	4.49396e-25	1.8343	up	Zinc finger, C2H2 type;; C2H2-type zinc finger	Krueppel-like factor 4 OS=Mus musculus OX=10090 GN=Klf4 PE=1 SV=3	Uncharacterized protein OS=Perca flavescens OX=8167 GN=EPR50_G00169810 PE=4 SV=1	Krueppel-like factor 4 [Perca flavescens]
Dxb_GLEAN_10005181	3.2411e-06	0.000175671	1.50649	up	T-box	T-box transcription factor TBX5-A OS=Danio rerio OX=7955 GN=tbx5a PE=2 SV=2	Uncharacterized protein OS=Perca flavescens OX=8167 GN=EPR50_G00169330 PE=4 SV=1	T-box transcription factor TBX5-A-like [Perca flavescens]
Dxb_GLEAN_10005194	3.30424e-07	2.38347e-05	-1.15446	down	Protein melan-A	--	Melan-A OS=Nothobranchius rachovii OX=451742 GN=MLANA PE=4 SV=1	melanoma antigen recognized by T-cells 1 isoform X1 [Perca flavescens]
Dxb_GLEAN_10005220	4.43611e-09	5.03382e-07	1.4462	up	LIF / OSM family	--	Uncharacterized protein OS=Labrus bergylta OX=56723 PE=4 SV=1	uncharacterized protein LOC110001828 [Labrus bergylta]
Dxb_GLEAN_10005270	2.01575e-08	1.91734e-06	-1.05379	down	Saposin-like type B, region 2;; Saposin-like type B, region 1;; Saposin A-type domain	Prosaposin OS=Mus musculus OX=10090 GN=Psap PE=1 SV=2	Uncharacterized protein OS=Perca flavescens OX=8167 GN=EPR50_G00168630 PE=4 SV=1	prosaposin-like [Perca flavescens]
Dxb_GLEAN_10005289	5.21414e-07	3.50087e-05	1.39299	up	Liver-expressed antimicrobial peptide 2 precursor (LEAP-2)	--	Uncharacterized protein OS=Stegastes partitus OX=144197 PE=4 SV=1	liver-expressed antimicrobial peptide 2-like [Seriola dumerili]
Dxb_GLEAN_10005485	1.76708e-13	3.80982e-11	1.28944	up	MAC/Perforin domain;; Sushi repeat (SCR repeat)	Complement component C6 OS=Pongo pygmaeus OX=9600 GN=C6 PE=2 SV=1	Complement component C6-like protein OS=Siniperca chuatsi OX=119488 PE=2 SV=1	complement component C6-like protein [Siniperca chuatsi]
Dxb_GLEAN_10005589	7.52833e-24	4.86933e-21	2.40583	up	Fatty acid hydroxylase superfamily	Cholesterol 25-hydroxylase-like protein OS=Danio rerio OX=7955 GN=ch25h PE=2 SV=1	Uncharacterized protein OS=Anabas testudineus OX=64144 PE=3 SV=1	cholesterol 25-hydroxylase [Anabas testudineus]
Dxb_GLEAN_10005812	5.47029e-10	7.58182e-08	-1.25783	down	NLRC4 helical domain HD2;; NACHT domain;; Fish-specific NACHT associated domain;; SPRY-associated domain;; NOD2 winged helix domain;; Leucine Rich repeat;; SPRY domain;; Leucine Rich Repeat	NLR family CARD domain-containing protein 3 OS=Homo sapiens OX=9606 GN=NLRC3 PE=1 SV=2	Protein NLRC3 OS=Larimichthys crocea OX=215358 GN=EH28_02012 PE=4 SV=1	NACHT, LRR and PYD domains-containing protein 3-like [Seriola lalandi dorsalis]
Dxb_GLEAN_10005865	5.0285e-07	3.39975e-05	-1.23631	down	Reprolysin (M12B) family zinc metalloprotease;; Reprolysin family propeptide;; ADAM cysteine-rich;; Disintegrin;; Metallo-peptidase family M12;; Metallo-peptidase family M12B Reprolysin-like;; Metallo-peptidase family M12B Reprolysin-like;; Metallo-peptidase family M12B Reprolysin-like	Disintegrin and metalloproteinase domain-containing protein 9 OS=Mus musculus OX=10090 GN=Adam9 PE=1 SV=2	Uncharacterized protein OS=Amphiprion ocellaris OX=80972 PE=4 SV=1	disintegrin and metalloproteinase domain-containing protein 9-like [Amphiprion ocellaris]
Dxb_GLEAN_10005882	3.75618e-29	4.85899e-26	-1.69824	down	RTP801 C-terminal region	DNA damage-inducible transcript 4 protein OS=Danio rerio OX=7955 GN=ddit4 PE=2 SV=1	Uncharacterized protein OS=Perca flavescens OX=8167 GN=EPR50_G00212980 PE=4 SV=1	DNA damage-inducible transcript 4 protein [Perca flavescens]
Dxb_GLEAN_10006031	4.01815e-07	2.79456e-05	-1.0801	down	Trypsin;; Domain of unknown function (DUF1986);; Trypsin-like peptidase domain	Plasma kallikrein OS=Mus musculus OX=10090 GN=Klkb1 PE=1 SV=2	Uncharacterized protein OS=Labrus bergylta OX=56723 PE=3 SV=1	chymotrypsin-like protease CTRL-1 [Perca flavescens]
Dxb_GLEAN_10006169	7.21988e-06	0.000336766	-1.40499	down	Major Facilitator Superfamily	Monocarboxylate transporter 7 OS=Homo sapiens OX=9606 GN=SLC16A6 PE=1 SV=2	Monocarboxylate transporter 7 OS=Dicentrarchus labrax OX=13489 GN=SLC16A6 PE=4 SV=1	Monocarboxylate transporter 7 [Dicentrarchus labrax]
Dxb_GLEAN_10006306	0.000152749	0.00399453	-1.13648	down	Phosphatidylinositol-specific phospholipase C, X domain	PI-PLC X domain-containing protein 1 OS=Homo sapiens OX=9606 GN=PLCXD1 PE=2 SV=1	Uncharacterized protein OS=Monopterus albus OX=43700 PE=4 SV=1	PI-PLC X domain-containing protein 1-like [Monopterus albus]
Dxb_GLEAN_10006432	1.30346e-05	0.000540435	-1.05712	down	Vps52 / Sac2 family;; Immunoglobulin V-set domain;; Exocyst complex component Sec3;; Immunoglobulin domain	Vacuolar protein sorting-associated protein 52 homolog OS=Homo sapiens OX=9606 GN=VPS52 PE=1 SV=1	Uncharacterized protein OS=Perca flavescens OX=8167 GN=EPR50_G00144530 PE=4 SV=1	vacuolar protein sorting-associated protein 52 homolog isoform X1 [Acanthochromis polyacanthus]
Dxb_GLEAN_10006448	6.30591e-22	3.496e-19	-2.25724	down	Chitin synthase;; Glycosyl transferase family group 2;; Glycosyltransferase like family 2	Chitin synthase chs-2 OS=Caenorhabditis elegans OX=6239 GN=chs-2 PE=1 SV=1	Uncharacterized protein OS=Anabas testudineus OX=64144 PE=4 SV=1	uncharacterized protein LOC111233240 [Seriola dumerili]
Dxb_GLEAN_10006453	0.000301048	0.00682423	1.15059	up	Interleukin 11	--	Interleukin-11 (Fragment) OS=Paralichthys olivaceus OX=8255 GN=il-11 PE=2 SV=1	TPA: interleukin-11, partial [Paralichthys olivaceus]
Dxb_GLEAN_10006471	1.09398e-05	0.000468599	-1.27992	down	Protein tyrosine kinase;; Protein kinase domain	Tyrosine-protein kinase STYK1 OS=Homo sapiens OX=9606 GN=STYK1 PE=1 SV=4	Uncharacterized protein OS=Acanthochromis polyacanthus OX=80966 PE=4 SV=1	tyrosine-protein kinase STYK1-like [Seriola dumerili]
Dxb_GLEAN_10006545	8.81954e-05	0.00254879	1.20924	up	Zinc finger, C2H2 type;; C2H2-type zinc finger;; Zinc-finger double domain;; Zinc-finger of C2H2 type;; Zinc-finger double-stranded RNA-binding;; C2H2-type zinc finger	Sal-like protein 3 OS=Mus musculus OX=10090 GN=Sall3 PE=1 SV=2	Uncharacterized protein OS=Perca flavescens OX=8167 GN=EPR50_G00146250 PE=4 SV=1	sal-like protein 3 [Perca flavescens]
Dxb_GLEAN_10006691	0.000280837	0.00650282	1.06341	up	SH2 domain	SH2 domain-containing adapter protein E OS=Homo sapiens OX=9606 GN=SHE PE=1 SV=1	Uncharacterized protein OS=Seriola dumerili OX=41447 GN=SHE PE=4 SV=1	SH2 domain-containing adapter protein E [Seriola dumerili]
Dxb_GLEAN_10006821	1.04365e-06	6.55371e-05	1.61166	up	Hox protein A13 N terminal;; Homeodomain;; Homeobox KN domain	Homeobox protein Hox-A13a OS=Takifugu rubripes OX=31033 GN=hoxa13a PE=3 SV=1	Uncharacterized protein OS=Seriola dumerili OX=41447 PE=4 SV=1	homeobox protein Hox-A13 [Perca flavescens]
Dxb_GLEAN_10006871	4.77194e-10	6.75874e-08	1.20999	up	Kunitz/Bovine pancreatic trypsin inhibitor domain	Tissue factor pathway inhibitor 2 OS=Bos taurus OX=9913 GN=TFPI2 PE=2 SV=1	Tissue factor pathway inhibitor OS=Sciaenops ocellatus OX=76340 GN=TFPI2 PE=2 SV=1	putative tissue factor pathway inhibitor 2 [Sciaenops ocellatus]
Dxb_GLEAN_10006897	6.25688e-05	0.00193326	1.32366	up	Interleukin-6/G-CSF/MGF family	Interleukin-6 OS=Paralichthys olivaceus OX=8255 GN=il6 PE=2 SV=1	Interleukin-6 OS=Epinephelus coioides OX=94232 GN=IL6 PE=2 SV=1	interleukin-6 [Epinephelus coioides]
Dxb_GLEAN_10006991	1.1391e-07	9.40559e-06	-1.32967	down	Zinc-binding domain	Receptor-transporting protein 3 OS=Homo sapiens OX=9606 GN=RTP3 PE=1 SV=1	Uncharacterized protein OS=Mola mola OX=94237 PE=4 SV=1	receptor-transporting protein 3-like isoform X2 [Fundulus heteroclitus]
Dxb_GLEAN_10007025	0.000342087	0.00754233	1.15753	up	Lipocalin / cytosolic fatty-acid binding protein family;; Lipocalin / cytosolic fatty-acid binding protein family	Fatty acid-binding protein, heart OS=Bos taurus OX=9913 GN=FABP3 PE=1 SV=2	Uncharacterized protein OS=Haplochromis burtoni OX=8153 PE=3 SV=1	PREDICTED: fatty acid-binding protein, heart-like [Paralichthys olivaceus]
Dxb_GLEAN_10007058	1.56748e-08	1.56781e-06	-1.53238	down	Zinc-binding domain	Receptor-transporting protein 2 OS=Mus musculus OX=10090 GN=Rtp2 PE=1 SV=1	Receptor-transporting protein 3 OS=Anoplopoma fimbria OX=229290 GN=RTP3 PE=2 SV=1	Receptor-transporting protein 3 [Anoplopoma fimbria]
Dxb_GLEAN_10007092	2.82041e-21	1.40326e-18	2.01416	up	Endothelin family	Endothelin-2 OS=Atelerix albiventris OX=9368 GN=EDN2 PE=2 SV=1	Uncharacterized protein OS=Perca flavescens OX=8167 GN=EPR50_G00152110 PE=4 SV=1	endothelin-2-like [Perca flavescens]
Dxb_GLEAN_10007110	9.37804e-06	0.000413458	1.43741	up	Collagen triple helix repeat (20 copies)	Collagen alpha-1(IX) chain OS=Homo sapiens OX=9606 GN=COL9A1 PE=1 SV=3	Uncharacterized protein OS=Seriola lalandi dorsalis OX=1841481 PE=4 SV=1	PREDICTED: collagen alpha-1(IX) chain-like isoform X2 [Lates calcarifer]
Dxb_GLEAN_10007172	2.99584e-07	2.19364e-05	1.04675	up	Protein kinase domain;; Protein tyrosine kinase;; Kinase-like	SNF-related serine/threonine-protein kinase OS=Homo sapiens OX=9606 GN=SNRK PE=1 SV=2	SNF-related serine/threonine-protein kinase OS=Larimichthys crocea OX=215358 GN=EH28_03761 PE=4 SV=1	SNF-related serine/threonine-protein kinase [Larimichthys crocea]
Dxb_GLEAN_10007207	3.40932e-05	0.00118011	1.13724	up	TNF(Tumour Necrosis Factor) family	Tumor necrosis factor OS=Sparus aurata OX=8175 GN=tnf PE=3 SV=1	Tumor necrosis factor 2 OS=Epinephelus coioides OX=94232 PE=2 SV=1	tumor necrosis factor 2 [Epinephelus coioides]
Dxb_GLEAN_10007327	1.05471e-07	8.85959e-06	1.27171	up	Mitochondrial branched-chain alpha-ketoacid dehydrogenase kinase;; Histidine kinase-, DNA gyrase B-, and HSP90-like ATPase	[Pyruvate dehydrogenase (acetyl-transferring)] kinase isozyme 2, mitochondrial OS=Homo sapiens OX=9606 GN=PDK2 PE=1 SV=2	Uncharacterized protein OS=Perca flavescens OX=8167 GN=EPR50_G00164200 PE=4 SV=1	pyruvate dehydrogenase (acetyl-transferring) kinase isozyme 2, mitochondrial-like [Perca flavescens]
Dxb_GLEAN_10007543	2.92398e-08	2.70176e-06	1.3421	up	HCO3- transporter family;; Band 3 cytoplasmic domain	Band 3 anion exchange protein OS=Oncorhynchus mykiss OX=8022 GN=slc4a1 PE=2 SV=2	Anion exchange protein OS=Amphiprion ocellaris OX=80972 PE=3 SV=1	band 3 anion exchange protein-like [Amphiprion ocellaris]
Dxb_GLEAN_10007567	5.05269e-27	4.66868e-24	2.26028	up	ADP-ribosylation factor family;; Ras of Complex, Roc, domain of DAPkinase;; Ras family;; Signal recognition particle receptor beta subunit;; 50S ribosome-binding GTPase;; Gtr1/RagA G protein conserved region	ADP-ribosylation factor-like protein 5C OS=Mus musculus OX=10090 GN=Arl5c PE=2 SV=1	Uncharacterized protein OS=Kryptolebias marmoratus OX=37003 PE=3 SV=1	ADP-ribosylation factor-like protein 5B [Kryptolebias marmoratus]
Dxb_GLEAN_10007576	0.000211737	0.00515757	-1.10722	down	Putative Phosphatase;; haloacid dehalogenase-like hydrolase	Probable phosphatase phospho1 OS=Danio rerio OX=7955 GN=phospho1 PE=2 SV=1	Uncharacterized protein OS=Perca flavescens OX=8167 GN=EPR50_G00160510 PE=4 SV=1	PREDICTED: probable phosphatase phospho1 isoform X1 [Notothenia coriiceps]
Dxb_GLEAN_10007654	2.68443e-21	1.37076e-18	1.96135	up	bZIP Maf transcription factor	Transcription factor MafK OS=Mus musculus OX=10090 GN=Mafk PE=1 SV=1	Uncharacterized protein OS=Amphiprion ocellaris OX=80972 PE=3 SV=1	transcription factor MafK [Seriola dumerili]
Dxb_GLEAN_10007691	3.49899e-05	0.00119955	-1.23053	down	RING-type zinc-finger;; Ring finger domain;; zinc-RING finger domain;; Zinc finger, C3HC4 type (RING finger);; Zinc finger, C3HC4 type (RING finger)	RING finger protein 222 OS=Mus musculus OX=10090 GN=Rnf222 PE=2 SV=2	Putative RING finger protein 222 OS=Scophthalmus maximus OX=52904 GN=SMAX5B_020840 PE=4 SV=1	PREDICTED: RING finger protein 222 [Lates calcarifer]
Dxb_GLEAN_10007692	5.87419e-22	3.35243e-19	1.97509	up	NUDE protein, C-terminal conserved region	Nuclear distribution protein nudE-like 1-B OS=Danio rerio OX=7955 GN=ndel1b PE=2 SV=1	Uncharacterized protein OS=Seriola lalandi dorsalis OX=1841481 PE=4 SV=1	nuclear distribution protein nudE-like 1-B [Seriola lalandi dorsalis]
Dxb_GLEAN_10007714	1.98791e-08	1.90017e-06	-1.32495	down	SPRY-associated domain;; SPRY domain;; B-box zinc finger;; RING-type zinc-finger;; Zinc finger, C3HC4 type (RING finger);; Zinc finger, C3HC4 type (RING finger);; U-box domain;; Zinc finger, C3HC4 type (RING finger)	Zinc-binding protein A33 OS=Pleurodeles waltl OX=8319 PE=1 SV=2	Uncharacterized protein OS=Stegastes partitus OX=144197 PE=4 SV=1	zinc-binding protein A33-like [Perca flavescens]
Dxb_GLEAN_10007821	5.09916e-30	7.06744e-27	1.64735	up	SH2 domain;; SOCS box	Suppressor of cytokine signaling 3 OS=Gallus gallus OX=9031 GN=SOCS3 PE=2 SV=1	Suppressor of cytokine signaling 3 (Fragment) OS=Siniperca chuatsi OX=119488 GN=Socs3 PE=2 SV=1	suppressor of cytokine signaling 3, partial [Siniperca chuatsi]
Dxb_GLEAN_10007825	4.35661e-06	0.000224829	-1.1525	down	Scavenger receptor cysteine-rich domain;; BTB And C-terminal Kelch	Galectin-3-binding protein A OS=Danio rerio OX=7955 GN=lgals3bpa PE=2 SV=1	Uncharacterized protein OS=Perca flavescens OX=8167 GN=EPR50_G00157990 PE=4 SV=1	hypothetical protein EPR50_G00157990 [Perca flavescens]
Dxb_GLEAN_10007951	0.000175856	0.00445472	-1.24854	down	--	--	Uncharacterized protein OS=Larimichthys crocea OX=215358 GN=EH28_10083 PE=4 SV=1	uncharacterized protein LOC114570023 [Perca flavescens]
Dxb_GLEAN_10007967	3.14448e-05	0.00110937	1.24463	up	7 transmembrane receptor (rhodopsin family);; Serpentine type 7TM GPCR chemoreceptor Srsx;; Serpentine type 7TM GPCR chemoreceptor Srv;; Serpentine type 7TM GPCR chemoreceptor Srx	Somatostatin receptor type 5 OS=Homo sapiens OX=9606 GN=SSTR5 PE=1 SV=3	Somtostatin receptor type five OS=Epinephelus coioides OX=94232 PE=2 SV=1	somtostatin receptor type five [Epinephelus coioides]
Dxb_GLEAN_10007975	1.73095e-14	4.53882e-12	1.17495	up	BTG family;; Ataxin-2 C-terminal region	Protein Tob1 OS=Homo sapiens OX=9606 GN=TOB1 PE=1 SV=1	Uncharacterized protein OS=Oryzias latipes OX=8090 GN=tob1 PE=4 SV=2	PREDICTED: protein Tob1-like [Lates calcarifer]
Dxb_GLEAN_10007988	1.64665e-26	1.45234e-23	2.2947	up	Immediate early response protein (IER)	Immediate early response gene 2 protein OS=Danio rerio OX=7955 GN=ier2 PE=1 SV=1	Uncharacterized protein OS=Seriola dumerili OX=41447 PE=4 SV=1	immediate early response gene 2 protein-like [Perca flavescens]
Dxb_GLEAN_10008022	3.66622e-09	4.33777e-07	1.17147	up	NUDIX domain	ADP-ribose pyrophosphatase, mitochondrial OS=Mus musculus OX=10090 GN=Nudt9 PE=1 SV=1	Uncharacterized protein OS=Perca flavescens OX=8167 GN=EPR50_G00155830 PE=4 SV=1	ADP-ribose pyrophosphatase, mitochondrial isoform X1 [Perca flavescens]
Dxb_GLEAN_10008124	2.75071e-14	6.84292e-12	1.65428	up	Chromo (CHRromatin Organisation MOdifier) domain	Chromobox protein homolog 7 OS=Homo sapiens OX=9606 GN=CBX7 PE=1 SV=1	Uncharacterized protein OS=Perca flavescens OX=8167 GN=EPR50_G00154750 PE=4 SV=1	PREDICTED: chromobox protein homolog 8-like [Lates calcarifer]
Dxb_GLEAN_10008199	2.65156e-06	0.000147003	1.07991	up	Domain of unknown function (DUF1908);; Protein kinase domain;; Protein tyrosine kinase;; PDZ domain;; PDZ domain;; PDZ domain	Microtubule-associated serine/threonine-protein kinase 1 OS=Homo sapiens OX=9606 GN=MAST1 PE=1 SV=2	Putative microtubule-associated serine/threonine-protein kinase 1 OS=Scophthalmus maximus OX=52904 GN=SMAX5B_005761 PE=4 SV=1	microtubule-associated serine/threonine-protein kinase 1-like [Seriola lalandi dorsalis]
Dxb_GLEAN_10008308	1.76151e-42	1.13935e-38	-4.10276	down	--	--	Uncharacterized protein OS=Perca flavescens OX=8167 GN=EPR50_G00009930 PE=4 SV=1	PREDICTED: uncharacterized protein LOC109623555 [Paralichthys olivaceus]
Dxb_GLEAN_10008319	0.000280426	0.00650282	1.05276	up	HMG (high mobility group) box;; HMG-box domain	Transcription factor SOX-11 OS=Mus musculus OX=10090 GN=Sox11 PE=1 SV=1	Transcription factor SOX OS=Larimichthys crocea OX=215358 GN=EH28_08076 PE=4 SV=1	transcription factor SOX-11 [Larimichthys crocea]
Dxb_GLEAN_10008337	8.15825e-09	8.79459e-07	1.10095	up	Protein of unknown function (DUF1358)	Transmembrane protein 242 OS=Danio rerio OX=7955 GN=tmem242 PE=2 SV=2	Transmembrane protein 242 OS=Anabas testudineus OX=64144 PE=4 SV=1	transmembrane protein 242 [Seriola lalandi dorsalis]
Dxb_GLEAN_10008480	7.29251e-11	1.20943e-08	-1.08658	down	Ras family;; Ras of Complex, Roc, domain of DAPkinase	Rho-related GTP-binding protein RhoV OS=Rattus norvegicus OX=10116 GN=Rhov PE=1 SV=1	Uncharacterized protein OS=Cynoglossus semilaevis OX=244447 PE=4 SV=1	rho-related GTP-binding protein RhoV [Cynoglossus semilaevis]
Dxb_GLEAN_10008567	0.000147043	0.00387141	1.00089	up	HMG (high mobility group) box;; Sox 17/18 central domain;; HMG-box domain	Transcription factor Sox-7 OS=Xenopus laevis OX=8355 GN=sox7 PE=2 SV=1	Uncharacterized protein OS=Perca flavescens OX=8167 GN=EPR50_G00187610 PE=4 SV=1	transcription factor SOX-7 [Perca flavescens]
Dxb_GLEAN_10008591	1.26246e-40	4.53525e-37	3.08217	up	bZIP transcription factor;; bZIP Maf transcription factor;; Basic region leucine zipper	Jun dimerization protein 2 OS=Rattus norvegicus OX=10116 GN=Jdp2 PE=1 SV=1	Uncharacterized protein OS=Perca flavescens OX=8167 GN=EPR50_G00187860 PE=4 SV=1	jun dimerization protein 2-like [Perca flavescens]
Dxb_GLEAN_10008593	4.23177e-130	8.21133e-126	4.60354	up	bZIP transcription factor;; Basic region leucine zipper;; bZIP Maf transcription factor	Proto-oncogene c-Fos OS=Takifugu rubripes OX=31033 GN=fos PE=3 SV=1	Proto-oncogene protein c-Fos OS=Dicentrarchus labrax OX=13489 GN=c-Fos PE=2 SV=1	proto-oncogene protein c-Fos [Dicentrarchus labrax]
Dxb_GLEAN_10008635	1.60753e-05	0.000640502	-1.10423	down	Centrosome-associated C terminus;; Centrosome-associated N terminus	Protein FAM110C OS=Homo sapiens OX=9606 GN=FAM110C PE=1 SV=2	Uncharacterized protein OS=Seriola dumerili OX=41447 PE=4 SV=1	PREDICTED: protein FAM110C [Notothenia coriiceps]
Dxb_GLEAN_10008715	4.5209e-05	0.00149699	1.35756	up	Single-minded protein C-terminus;; PAS fold;; PAS domain;; PAS fold;; Helix-loop-helix DNA-binding domain	Single-minded homolog 1 OS=Homo sapiens OX=9606 GN=SIM1 PE=2 SV=2	Uncharacterized protein OS=Perca flavescens OX=8167 GN=EPR50_G00189130 PE=4 SV=1	hypothetical protein EPR50_G00189130 [Perca flavescens]
Dxb_GLEAN_10008915	2.31507e-09	2.89817e-07	-1.09245	down	--	--	Uncharacterized protein OS=Perca flavescens OX=8167 GN=EPR50_G00191290 PE=4 SV=1	hypothetical protein EPR50_G00191290 [Perca flavescens]
Dxb_GLEAN_10008935	2.58171e-22	1.51805e-19	1.90908	up	bZIP transcription factor;; Basic region leucine zipper;; bZIP Maf transcription factor	Cyclic AMP-dependent transcription factor ATF-3 OS=Homo sapiens OX=9606 GN=ATF3 PE=1 SV=2	Uncharacterized protein OS=Labrus bergylta OX=56723 PE=4 SV=1	cyclic AMP-dependent transcription factor ATF-3 [Labrus bergylta]
Dxb_GLEAN_10009046	2.89344e-08	2.68633e-06	-1.76425	down	Peptidase dimerisation domain	Peptidase M20 domain-containing protein 2 OS=Mus musculus OX=10090 GN=Pm20d2 PE=1 SV=1	Peptidase M20 domain-containing protein 2 OS=Larimichthys crocea OX=215358 GN=EH28_09922 PE=3 SV=1	peptidase M20 domain-containing protein 2 [Larimichthys crocea]
Dxb_GLEAN_10009153	0.000279102	0.00648587	1.01837	up	Cytochrome P450	Cytochrome P450 26C1 OS=Homo sapiens OX=9606 GN=CYP26C1 PE=2 SV=2	Uncharacterized protein OS=Perca flavescens OX=8167 GN=EPR50_G00182100 PE=4 SV=1	PREDICTED: cytochrome P450 26B1 [Lates calcarifer]
Dxb_GLEAN_10009159	1.09344e-07	9.10605e-06	1.43394	up	Sulfotransferase domain	Sulfotransferase 6B1 OS=Danio rerio OX=7955 GN=sult6b1 PE=1 SV=1	Sulfotransferase 6B1 OS=Larimichthys crocea OX=215358 GN=EH28_03968 PE=4 SV=1	protein ZNF365 isoform X2 [Larimichthys crocea]
Dxb_GLEAN_10009262	2.75027e-09	3.39912e-07	-1.1754	down	Sulfotransferase domain;; Sulfotransferase family	Amine sulfotransferase OS=Oryctolagus cuniculus OX=9986 GN=SULT3A1 PE=1 SV=1	Sulfotransferase (Fragment) OS=Gasterosteus aculeatus OX=69293 PE=3 SV=1	amine sulfotransferase [Larimichthys crocea]
Dxb_GLEAN_10009345	1.48135e-10	2.33692e-08	1.46785	up	WD domain, G-beta repeat	Cilia- and flagella-associated protein 43 OS=Homo sapiens OX=9606 GN=CFAP43 PE=2 SV=3	Uncharacterized protein OS=Perca flavescens OX=8167 GN=EPR50_G00179480 PE=4 SV=1	cilia- and flagella-associated protein 43 isoform X3 [Perca flavescens]
Dxb_GLEAN_10009386	5.23855e-18	2.11768e-15	-2.09534	down	RTP801 C-terminal region	DNA damage-inducible transcript 4 protein OS=Danio rerio OX=7955 GN=ddit4 PE=2 SV=1	Uncharacterized protein OS=Seriola dumerili OX=41447 PE=4 SV=1	PREDICTED: DNA damage-inducible transcript 4 protein-like [Lates calcarifer]
Dxb_GLEAN_10009389	3.49204e-07	2.50035e-05	1.21782	up	Fatty acid desaturase	Acyl-CoA desaturase OS=Cyprinus carpio OX=7962 PE=2 SV=2	Acyl-CoA desaturase OS=Larimichthys crocea OX=215358 GN=SCD1 PE=2 SV=1	acyl-CoA desaturase [Larimichthys crocea]
Dxb_GLEAN_10009440	5.74768e-08	5.02378e-06	1.26983	up	Thyroid cancer protein 1	Arginine vasopressin-induced protein 1 OS=Pongo abelii OX=9601 GN=AVPI1 PE=2 SV=1	Arginine vasopressin-induced protein 1 OS=Larimichthys crocea OX=215358 GN=EH28_11330 PE=4 SV=1	arginine vasopressin-induced protein 1 [Labrus bergylta]
Dxb_GLEAN_10009586	0.00034612	0.00758026	1.17449	up	Proline-rich protein family 18	Proline-rich protein 18 OS=Mus musculus OX=10090 GN=Prr18 PE=1 SV=2	Uncharacterized protein OS=Perca flavescens OX=8167 GN=EPR50_G00177050 PE=4 SV=1	proline-rich protein 18 [Perca flavescens]
Dxb_GLEAN_10009904	8.93751e-05	0.00256165	1.06079	up	Protein kinase domain;; Protein tyrosine kinase;; Phorbol esters/diacylglycerol binding domain (C1 domain);; PH domain;; Kinase-like;; Lipopolysaccharide kinase (Kdo/WaaP) family	Serine/threonine-protein kinase D1 OS=Homo sapiens OX=9606 GN=PRKD1 PE=1 SV=2	Serine/threonine-protein kinase OS=Acanthochromis polyacanthus OX=80966 PE=3 SV=1	serine/threonine-protein kinase D1-like [Acanthochromis polyacanthus]
Dxb_GLEAN_10009921	3.02365e-07	2.19741e-05	-1.18384	down	--	--	Uncharacterized protein OS=Perca flavescens OX=8167 GN=EPR50_G00193950 PE=4 SV=1	uncharacterized protein LOC114573981 [Perca flavescens]
Dxb_GLEAN_10009946	3.09596e-05	0.00109624	1.10071	up	Forkhead domain	Forkhead box protein I1c OS=Xenopus laevis OX=8355 GN=foxi1c PE=2 SV=1	Uncharacterized protein OS=Seriola lalandi dorsalis OX=1841481 PE=4 SV=1	PREDICTED: LOW QUALITY PROTEIN: forkhead box protein I1c-like [Lates calcarifer]
Dxb_GLEAN_10010019	8.09951e-23	4.91134e-20	1.8082	up	PH domain;; Domain found in Dishevelled, Egl-10, and Pleckstrin (DEP);; Pleckstrin homology domain	Pleckstrin-2 OS=Mus musculus OX=10090 GN=Plek2 PE=1 SV=1	Uncharacterized protein OS=Seriola lalandi dorsalis OX=1841481 PE=4 SV=1	pleckstrin-2 [Seriola lalandi dorsalis]
Dxb_GLEAN_10010149	4.16598e-06	0.00021672	1.34168	up	alpha/beta hydrolase fold;; Carboxylesterase family	Neutral cholesterol ester hydrolase 1 OS=Bos taurus OX=9913 GN=NCEH1 PE=2 SV=2	Uncharacterized protein OS=Perca flavescens OX=8167 GN=EPR50_G00206780 PE=4 SV=1	neutral cholesterol ester hydrolase 1-like isoform X1 [Perca flavescens]
Dxb_GLEAN_10010185	0.000189296	0.0047091	-1.13217	down	--	Rab GTPase-activating protein 1-like, isoform 10 OS=Homo sapiens OX=9606 GN=RABGAP1L PE=1 SV=1	Uncharacterized protein OS=Perca flavescens OX=8167 GN=EPR50_G00206380 PE=4 SV=1	rab GTPase-activating protein 1-like [Perca flavescens]
Dxb_GLEAN_10010317	1.8395e-05	0.000713872	-1.10914	down	Thymidylate kinase;; Deoxynucleoside kinase	UMP-CMP kinase 2, mitochondrial OS=Homo sapiens OX=9606 GN=CMPK2 PE=1 SV=3	Uncharacterized protein (Fragment) OS=Perca flavescens OX=8167 GN=EPR50_G00205080 PE=4 SV=1	hypothetical protein EPR50_G00205080, partial [Perca flavescens]
Dxb_GLEAN_10010386	5.48982e-06	0.00027314	1.29747	up	Ankyrin repeats (3 copies);; Ankyrin repeats (many copies);; Ankyrin repeat;; Ankyrin repeat;; Ankyrin repeats (many copies);; SOCS box	Ankyrin repeat and SOCS box protein 2 OS=Mus musculus OX=10090 GN=Asb2 PE=1 SV=1	Ankyrin repeat and SOCS box containing 2b OS=Amphiprion percula OX=161767 PE=4 SV=1	ankyrin repeat and SOCS box protein 2-like isoform X2 [Perca flavescens]
Dxb_GLEAN_10010471	0.000384751	0.00826766	-1.07998	down	ChaC-like protein	Glutathione-specific gamma-glutamylcyclotransferase 1 OS=Danio rerio OX=7955 GN=chac1 PE=3 SV=1	Gamma-glutamylcyclotransferase OS=Seriola dumerili OX=41447 PE=3 SV=1	glutathione-specific gamma-glutamylcyclotransferase 1-like [Perca flavescens]
Dxb_GLEAN_10010541	5.05395e-06	0.000255663	-1.2867	down	Interferon-induced 6-16 family	--	--	--
Dxb_GLEAN_10010620	8.08294e-16	2.48955e-13	1.24829	up	bZIP transcription factor;; Basic region leucine zipper;; bZIP Maf transcription factor	Fos-related antigen 2 OS=Rattus norvegicus OX=10116 GN=Fosl2 PE=1 SV=2	Uncharacterized protein OS=Perca flavescens OX=8167 GN=EPR50_G00202130 PE=4 SV=1	fos-related antigen 2 [Perca flavescens]
Dxb_GLEAN_10010624	1.44544e-08	1.45323e-06	1.02874	up	Pyridoxal-dependent decarboxylase, pyridoxal binding domain;; Pyridoxal-dependent decarboxylase, C-terminal sheet domain	Ornithine decarboxylase OS=Bos taurus OX=9913 GN=ODC1 PE=2 SV=1	Ornithine decarboxylase OS=Larimichthys crocea OX=215358 GN=EH28_01028 PE=3 SV=1	ornithine decarboxylase [Larimichthys crocea]
Dxb_GLEAN_10010690	2.69382e-24	1.93596e-21	-1.84943	down	Pre-pro-megakaryocyte potentiating factor precursor (Mesothelin)	Mesothelin-like protein OS=Homo sapiens OX=9606 GN=MSLNL PE=3 SV=3	Uncharacterized protein OS=Seriola dumerili OX=41447 PE=4 SV=1	uncharacterized protein LOC111668145, partial [Seriola lalandi dorsalis]
Dxb_GLEAN_10010815	1.47772e-35	3.18597e-32	1.80052	up	Zinc finger, C2H2 type;; Zinc-finger double domain;; Early growth response N-terminal domain;; C2H2-type zinc finger	Early growth response protein 1 OS=Homo sapiens OX=9606 GN=EGR1 PE=1 SV=1	Uncharacterized protein OS=Anabas testudineus OX=64144 PE=3 SV=1	PREDICTED: early growth response protein 1-like isoform X2 [Lates calcarifer]
Dxb_GLEAN_10010895	1.55375e-12	3.04535e-10	1.40921	up	BTG family	Protein BTG3 OS=Homo sapiens OX=9606 GN=BTG3 PE=1 SV=3	Uncharacterized protein OS=Anabas testudineus OX=64144 PE=4 SV=1	PREDICTED: protein BTG3 [Lates calcarifer]
Dxb_GLEAN_10010964	1.28413e-10	2.05928e-08	1.2074	up	Ubiquitin carboxyl-terminal hydrolase;; Ubiquitin carboxyl-terminal hydrolase	Ubiquitin carboxyl-terminal hydrolase 2 OS=Homo sapiens OX=9606 GN=USP2 PE=1 SV=2	Ubiquitin carboxyl-terminal hydrolase 2 OS=Larimichthys crocea OX=215358 GN=EH28_12650 PE=3 SV=1	ubiquitin carboxyl-terminal hydrolase 2 [Larimichthys crocea]
Dxb_GLEAN_10011044	1.34258e-08	1.37113e-06	-1.12907	down	SPRY-associated domain;; SPRY domain	Stonustoxin subunit alpha OS=Synanceia horrida OX=13279 PE=1 SV=3	Uncharacterized protein OS=Neolamprologus brichardi OX=32507 PE=4 SV=1	tripartite motif-containing protein 16 [Larimichthys crocea]
Dxb_GLEAN_10011065	1.7642e-08	1.73769e-06	-1.03027	down	Interferon regulatory factor transcription factor	Interferon regulatory factor 1 OS=Bos taurus OX=9913 GN=IRF1 PE=2 SV=1	Interferon regulatory factor OS=Epinephelus coioides OX=94232 GN=IRF-1 PE=2 SV=1	interferon regulatory factor 1 [Epinephelus coioides]
Dxb_GLEAN_10011075	0.000109265	0.00302449	-1.28024	down	Sodium:neurotransmitter symporter family	Sodium- and chloride-dependent betaine transporter OS=Oryctolagus cuniculus OX=9986 GN=SLC6A12 PE=2 SV=1	Transporter OS=Seriola lalandi dorsalis OX=1841481 PE=3 SV=1	sodium- and chloride-dependent GABA transporter 2-like [Seriola lalandi dorsalis]
Dxb_GLEAN_10011185	1.28783e-13	2.93989e-11	-1.87925	down	PMP-22/EMP/MP20/Claudin family	Claudin-4 OS=Chlorocebus aethiops OX=9534 GN=CLDN4 PE=2 SV=1	Uncharacterized protein OS=Perca flavescens OX=8167 GN=EPR50_G00138690 PE=4 SV=1	PREDICTED: claudin-4-like [Lates calcarifer]
Dxb_GLEAN_10011428	1.58202e-08	1.57423e-06	1.18271	up	L6 membrane protein	Transmembrane 4 L6 family member 1 OS=Homo sapiens OX=9606 GN=TM4SF1 PE=1 SV=1	Uncharacterized protein OS=Mastacembelus armatus OX=205130 PE=4 SV=1	PREDICTED: transmembrane 4 L6 family member 1-like [Lates calcarifer]
Dxb_GLEAN_10011664	4.38202e-13	9.15477e-11	1.31582	up	Laminin B (Domain IV);; Laminin EGF domain	Laminin subunit gamma-2 OS=Equus caballus OX=9796 GN=LAMC2 PE=2 SV=1	Uncharacterized protein OS=Perca flavescens OX=8167 GN=EPR50_G00132690 PE=4 SV=1	laminin subunit gamma-2-like [Perca flavescens]
Dxb_GLEAN_10011669	0.000437992	0.00906055	1.16182	up	HCO3- transporter family;; Band 3 cytoplasmic domain	Anion exchange protein 2 OS=Homo sapiens OX=9606 GN=SLC4A2 PE=1 SV=4	Anion exchange protein OS=Seriola dumerili OX=41447 PE=3 SV=1	PREDICTED: anion exchange protein 2-like isoform X3 [Lates calcarifer]
Dxb_GLEAN_10011697	3.32759e-08	3.01723e-06	1.22875	up	Myosin head (motor domain);; Unconventional myosin-X coiled coil domain;; PH domain;; IQ calmodulin-binding motif	Unconventional myosin-X OS=Homo sapiens OX=9606 GN=MYO10 PE=1 SV=3	Uncharacterized protein OS=Amazona aestiva OX=12930 GN=AAES_86271 PE=3 SV=1	hypothetical protein AAES_86271 [Amazona aestiva]
Dxb_GLEAN_10011839	5.52952e-19	2.43852e-16	1.36336	up	Zinc finger, C2H2 type;; C2H2-type zinc finger	Krueppel-like factor 2 OS=Homo sapiens OX=9606 GN=KLF2 PE=1 SV=2	Uncharacterized protein OS=Labrus bergylta OX=56723 PE=4 SV=1	Krueppel-like factor 2 [Labrus bergylta]
Dxb_GLEAN_10011870	0.000154143	0.00401475	1.08335	up	Rab effector MyRIP/melanophilin C-terminus;; FYVE-type zinc finger	Rab effector MyRIP OS=Homo sapiens OX=9606 GN=MYRIP PE=1 SV=2	Uncharacterized protein OS=Perca flavescens OX=8167 GN=EPR50_G00127130 PE=4 SV=1	rab effector MyRIP-like isoform X1 [Perca flavescens]
Dxb_GLEAN_10011934	0.000378869	0.00816969	1.18245	up	GATA-type transcription activator, N-terminal;; GATA zinc finger	GATA-binding factor 6-A OS=Xenopus laevis OX=8355 GN=gata6-a PE=2 SV=1	Uncharacterized protein OS=Perca flavescens OX=8167 GN=EPR50_G00126600 PE=4 SV=1	hypothetical protein EPR50_G00126600 [Perca flavescens]
Dxb_GLEAN_10011976	2.08997e-15	6.05279e-13	1.45695	up	Basic region leucine zipper	CCAAT/enhancer-binding protein delta OS=Mus musculus OX=10090 GN=Cebpd PE=1 SV=2	CCAAT/enhancer-binding protein OS=Seriola dumerili OX=41447 PE=3 SV=1	CCAAT/enhancer-binding protein delta [Mastacembelus armatus]
Dxb_GLEAN_10011977	4.28181e-15	1.20412e-12	1.33958	up	Domain of unknown function (DUF4503);; Domain of unknown function (DUF4502)	DNA repair-scaffolding protein OS=Homo sapiens OX=9606 GN=SPIDR PE=1 SV=2	Uncharacterized protein OS=Seriola dumerili OX=41447 GN=SPIDR PE=4 SV=1	DNA repair-scaffolding protein isoform X2 [Perca flavescens]
Dxb_GLEAN_10012075	1.70641e-16	5.42806e-14	1.17846	up	Protein kinase domain;; Protein tyrosine kinase;; POLO box duplicated region;; Kinase-like;; Fungal protein kinase	Serine/threonine-protein kinase PLK3 OS=Homo sapiens OX=9606 GN=PLK3 PE=1 SV=2	Serine/threonine-protein kinase PLK OS=Seriola dumerili OX=41447 PE=3 SV=1	serine/threonine-protein kinase PLK3 [Perca flavescens]
Dxb_GLEAN_10012150	1.26004e-07	1.03164e-05	1.37168	up	N-terminal C2 in EEIG1 and EHBP1 proteins	Protein FAM102B OS=Homo sapiens OX=9606 GN=FAM102B PE=1 SV=2	Uncharacterized protein OS=Seriola dumerili OX=41447 PE=4 SV=1	PREDICTED: protein FAM102B-like [Lates calcarifer]
Dxb_GLEAN_10012205	0.000170189	0.00434521	1.09465	up	--	--	Uncharacterized protein OS=Amphiprion ocellaris OX=80972 PE=4 SV=1	hypothetical protein EPR50_G00123800 [Perca flavescens]
Dxb_GLEAN_10012237	4.16728e-10	6.03447e-08	1.09931	up	Jun-like transcription factor;; bZIP transcription factor;; bZIP Maf transcription factor;; Basic region leucine zipper	Transcription factor jun-D OS=Rattus norvegicus OX=10116 GN=Jund PE=1 SV=1	Transcription factor jun-D OS=Larimichthys crocea OX=215358 GN=EH28_05985 PE=3 SV=1	transcription factor jun-D [Larimichthys crocea]
Dxb_GLEAN_10012238	2.41653e-10	3.63491e-08	-1.31103	down	Ras family;; Ras of Complex, Roc, domain of DAPkinase;; ADP-ribosylation factor family;; Signal recognition particle receptor beta subunit	Ras-related protein Rab-3A OS=Bos taurus OX=9913 GN=RAB3A PE=1 SV=3	Uncharacterized protein OS=Anabas testudineus OX=64144 GN=RAB3A PE=4 SV=1	ras-related protein Rab-3A-like [Anabas testudineus]
Dxb_GLEAN_10012441	1.17515e-07	9.66211e-06	1.17835	up	bZIP transcription factor;; pKID domain;; Basic region leucine zipper	cAMP-responsive element modulator OS=Canis lupus familiaris OX=9615 GN=CREM PE=2 SV=2	Uncharacterized protein OS=Seriola dumerili OX=41447 PE=4 SV=1	cAMP-responsive element modulator-like isoform X1 [Seriola dumerili]
Dxb_GLEAN_10012497	4.08409e-25	3.44555e-22	1.6463	up	Zinc finger, C2H2 type	Krueppel-like factor 2 OS=Mus musculus OX=10090 GN=Klf2 PE=1 SV=2	Uncharacterized protein OS=Perca flavescens OX=8167 GN=EPR50_G00130340 PE=4 SV=1	Krueppel-like factor 4 isoform X3 [Perca flavescens]
Dxb_GLEAN_10012550	5.41653e-07	3.62422e-05	1.64117	up	Hemopexin	Proteoglycan 4 OS=Mus musculus OX=10090 GN=Prg4 PE=1 SV=2	Proteoglycan 4a OS=Amphilophus citrinellus OX=61819 PE=4 SV=1	proteoglycan 4-like isoform X2 [Astatotilapia calliptera]
Dxb_GLEAN_10012589	3.77966e-09	4.41811e-07	1.59929	up	Eukaryotic-type carbonic anhydrase	Carbonic anhydrase OS=Danio rerio OX=7955 GN=cahz PE=1 SV=2	Uncharacterized protein OS=Seriola dumerili OX=41447 PE=3 SV=1	PREDICTED: carbonic anhydrase-like [Lates calcarifer]
Dxb_GLEAN_10012723	1.14711e-08	1.1967e-06	-1.51973	down	SLOG in TRPM;; Tetramerisation domain of TRPM;; Ion transport protein;; SLOG in TRPM, prokaryote	Transient receptor potential cation channel subfamily M member 1 OS=Rattus norvegicus OX=10116 GN=Trpm1 PE=2 SV=1	Transient receptor potential cation channel, subfamily M, member 1b OS=Seriola lalandi dorsalis OX=1841481 PE=4 SV=1	hypothetical protein EPR50_G00088750 [Perca flavescens]
Dxb_GLEAN_10012778	3.5652e-07	2.54335e-05	-1.63499	down	SPRY-associated domain;; SPRY domain;; Zinc finger, C3HC4 type (RING finger);; B-box zinc finger;; RING-type zinc-finger;; Zinc finger, C3HC4 type (RING finger)	Zinc-binding protein A33 OS=Pleurodeles waltl OX=8319 PE=1 SV=2	Uncharacterized protein OS=Anabas testudineus OX=64144 PE=4 SV=1	PREDICTED: zinc-binding protein A33-like [Lates calcarifer]
Dxb_GLEAN_10012838	6.34952e-05	0.00195255	-1.33101	down	Dual oxidase maturation factor	Dual oxidase maturation factor 2 OS=Homo sapiens OX=9606 GN=DUOXA2 PE=1 SV=2	Dual oxidase maturation factor 2 OS=Larimichthys crocea OX=215358 GN=EH28_04619 PE=4 SV=1	dual oxidase maturation factor 2-like [Perca flavescens]
Dxb_GLEAN_10012940	6.60367e-15	1.77969e-12	-1.37473	down	Immunoglobulin I-set domain;; Immunoglobulin domain;; Immunoglobulin domain	--	Putative T-cell surface antigen CD2-like OS=Scophthalmus maximus OX=52904 GN=SMAX5B_001350 PE=4 SV=1	SLAM family member 9 [Perca flavescens]
Dxb_GLEAN_10012990	1.51174e-13	3.3334e-11	1.00572	up	Cyclin-dependent kinase inhibitor	Cyclin-dependent kinase inhibitor 1C OS=Homo sapiens OX=9606 GN=CDKN1C PE=1 SV=1	Uncharacterized protein OS=Perca flavescens OX=8167 GN=EPR50_G00086130 PE=4 SV=1	cyclin-dependent kinase inhibitor 1C-like [Perca flavescens]
Dxb_GLEAN_10012994	1.33166e-05	0.000549779	1.26617	up	C2 domain	Synaptotagmin-12 OS=Homo sapiens OX=9606 GN=SYT12 PE=1 SV=1	Uncharacterized protein OS=Perca flavescens OX=8167 GN=EPR50_G00090560 PE=4 SV=1	hypothetical protein EPR50_G00090560 [Perca flavescens]
Dxb_GLEAN_10013067	5.1929e-10	7.30167e-08	1.42825	up	Adenosine/AMP deaminase	AMP deaminase 3 OS=Mus musculus OX=10090 GN=Ampd3 PE=1 SV=2	AMP deaminase OS=Seriola lalandi dorsalis OX=1841481 PE=3 SV=1	AMP deaminase 3-like isoform X1 [Seriola lalandi dorsalis]
Dxb_GLEAN_10013271	1.84497e-07	1.43199e-05	1.1707	up	Dual specificity phosphatase, catalytic domain	Dual specificity protein phosphatase 8 OS=Mus musculus OX=10090 GN=Dusp8 PE=2 SV=1	Uncharacterized protein OS=Perca flavescens OX=8167 GN=EPR50_G00085510 PE=4 SV=1	dual specificity protein phosphatase 8 isoform X1 [Perca flavescens]
Dxb_GLEAN_10013307	7.69905e-05	0.00228779	1.18894	up	Sodium:dicarboxylate symporter family	Excitatory amino acid transporter 2 OS=Rattus norvegicus OX=10116 GN=Slc1a2 PE=1 SV=2	Amino acid transporter OS=Larimichthys crocea OX=215358 GN=EH28_06868 PE=3 SV=1	excitatory amino acid transporter 2 isoform X2 [Amphiprion ocellaris]
Dxb_GLEAN_10013360	2.77589e-07	2.05586e-05	1.05215	up	Protein Family FAM60A	SIN3-HDAC complex-associated factor OS=Homo sapiens OX=9606 GN=SINHCAF PE=1 SV=1	Uncharacterized protein OS=Perca flavescens OX=8167 GN=EPR50_G00090140 PE=4 SV=1	hypothetical protein EPR50_G00090140 [Perca flavescens]
Dxb_GLEAN_10013654	6.43773e-05	0.00197342	1.30046	up	von Willebrand factor type A domain;; von Willebrand factor type A domain	Collagen alpha-3(VI) chain OS=Gallus gallus OX=9031 GN=COL6A3 PE=2 SV=2	Collagen alpha-3(VI) chain OS=Larimichthys crocea OX=215358 GN=EH28_06300 PE=4 SV=1	PREDICTED: collagen alpha-3(VI) chain isoform X7 [Lates calcarifer]
Dxb_GLEAN_10013666	0.000324781	0.00726042	1.07777	up	Nck-associated protein 5, Peripheral clock protein	Nck-associated protein 5 OS=Homo sapiens OX=9606 GN=NCKAP5 PE=1 SV=2	Uncharacterized protein OS=Acanthochromis polyacanthus OX=80966 PE=4 SV=1	nck-associated protein 5-like isoform X1 [Seriola lalandi dorsalis]
Dxb_GLEAN_10013871	4.29591e-06	0.000222288	-1.00843	down	HEPN domain	Sacsin OS=Homo sapiens OX=9606 GN=SACS PE=1 SV=2	Uncharacterized protein OS=Mola mola OX=94237 PE=4 SV=1	sacsin-like [Perca flavescens]
Dxb_GLEAN_10013907	0.000210475	0.00513717	1.2155	up	Protein kinase domain;; Protein tyrosine kinase;; Transforming growth factor beta type I GS-motif	Activin receptor type-1C OS=Homo sapiens OX=9606 GN=ACVR1C PE=1 SV=1	Receptor protein serine/threonine kinase OS=Seriola dumerili OX=41447 GN=ACVR1C PE=3 SV=1	activin receptor type-1C [Seriola dumerili]
Dxb_GLEAN_10014015	1.27625e-17	5.05393e-15	-1.62145	down	Common central domain of tyrosinase	L-dopachrome tautomerase OS=Sus scrofa OX=9823 GN=DCT PE=2 SV=1	Uncharacterized protein OS=Perca flavescens OX=8167 GN=EPR50_G00117640 PE=4 SV=1	L-dopachrome tautomerase [Larimichthys crocea]
Dxb_GLEAN_10014083	1.58139e-17	6.13705e-15	1.62474	up	Protein kinase domain;; Protein tyrosine kinase;; Kinase-like;; Haspin like kinase domain	Serine/threonine-protein kinase SIK2 OS=Gallus gallus OX=9031 GN=SIK2 PE=2 SV=1	Uncharacterized protein OS=Seriola lalandi dorsalis OX=1841481 PE=4 SV=1	PREDICTED: serine/threonine-protein kinase SIK2-like [Lates calcarifer]
Dxb_GLEAN_10014250	0.000132748	0.00356272	1.15524	up	--	--	Uncharacterized protein OS=Larimichthys crocea OX=215358 GN=EH28_11384 PE=4 SV=1	uncharacterized protein LOC111218043 [Seriola dumerili]
Dxb_GLEAN_10014259	0.00013421	0.00359202	-1.10101	down	Lectin C-type domain	CD209 antigen-like protein E OS=Mus musculus OX=10090 GN=Cd209e PE=2 SV=1	Uncharacterized protein OS=Amphiprion percula OX=161767 PE=4 SV=1	CD209 antigen-like protein E [Labrus bergylta]
Dxb_GLEAN_10014329	0.000121497	0.00330649	1.04187	up	CUB domain;; Extracellular link domain	Tumor necrosis factor-inducible gene 6 protein OS=Oryctolagus cuniculus OX=9986 GN=TNFAIP6 PE=2 SV=1	Uncharacterized protein (Fragment) OS=Perca flavescens OX=8167 GN=EPR50_G00114420 PE=4 SV=1	PREDICTED: tumor necrosis factor-inducible gene 6 protein [Lates calcarifer]
Dxb_GLEAN_10014392	2.12725e-11	3.75248e-09	1.19286	up	ADP-ribosylation factor family;; Ras of Complex, Roc, domain of DAPkinase;; Ras family;; Signal recognition particle receptor beta subunit;; 50S ribosome-binding GTPase	ADP-ribosylation factor-like protein 4C OS=Mus musculus OX=10090 GN=Arl4c PE=2 SV=1	Uncharacterized protein OS=Seriola lalandi dorsalis OX=1841481 PE=3 SV=1	ADP-ribosylation factor-like protein 4C [Seriola dumerili]
Dxb_GLEAN_10014481	4.07956e-12	7.68542e-10	1.3634	up	Endonuclease/Exonuclease/phosphatase family	Nocturnin OS=Xenopus laevis OX=8355 GN=noct PE=1 SV=1	Uncharacterized protein OS=Seriola dumerili OX=41447 PE=4 SV=1	nocturnin isoform X1 [Seriola dumerili]
Dxb_GLEAN_10014525	5.87703e-12	1.05591e-09	1.00402	up	ATP-dependent protease La (LON) substrate-binding domain;; Zinc finger, C3HC4 type (RING finger);; Zinc finger, C3HC4 type (RING finger);; zinc finger of C3HC4-type, RING;; Tetratricopeptide repeat;; RING-type zinc-finger;; Zinc finger, C3HC4 type (RING finger);; zinc-RING finger domain;; Ring finger domain;; U-box domain	LON peptidase N-terminal domain and RING finger protein 3 OS=Homo sapiens OX=9606 GN=LONRF3 PE=1 SV=1	Uncharacterized protein OS=Anabas testudineus OX=64144 GN=LONRF3 PE=4 SV=1	LON peptidase N-terminal domain and RING finger protein 3 [Anabas testudineus]
Dxb_GLEAN_10014697	5.32457e-15	1.45518e-12	1.47525	up	--	Proheparin-binding EGF-like growth factor OS=Gallus gallus OX=9031 GN=HBEGF PE=1 SV=1	Uncharacterized protein OS=Perca flavescens OX=8167 GN=EPR50_G00109780 PE=4 SV=1	proheparin-binding EGF-like growth factor [Perca flavescens]
Dxb_GLEAN_10014714	4.84926e-17	1.80952e-14	1.79819	up	Dual specificity phosphatase, catalytic domain;; Rhodanese-like domain;; Protein-tyrosine phosphatase	Dual specificity protein phosphatase 1 OS=Homo sapiens OX=9606 GN=DUSP1 PE=1 SV=3	Dual specificity protein phosphatase OS=Epinephelus coioides OX=94232 GN=MKP1 PE=2 SV=1	MAP kinase phosphatase 1 [Epinephelus coioides]
Dxb_GLEAN_10014794	6.43711e-35	1.24906e-31	1.42415	up	Domain of unknown function (DUF3432);; Early growth response N-terminal domain;; Zinc-finger double domain;; Zinc finger, C2H2 type;; C2H2-type zinc finger	Early growth response protein 1 OS=Danio rerio OX=7955 GN=egr1 PE=2 SV=2	Early growth response protein OS=Stegastes partitus OX=144197 PE=3 SV=1	PREDICTED: early growth response protein 1 [Stegastes partitus]
Dxb_GLEAN_10015000	3.78334e-27	3.6706e-24	2.6564	up	bZIP transcription factor;; Basic region leucine zipper;; bZIP Maf transcription factor	Fos-related antigen 1 OS=Rattus norvegicus OX=10116 GN=Fosl1 PE=2 SV=1	Uncharacterized protein OS=Labrus bergylta OX=56723 PE=4 SV=1	fos-related antigen 1 isoform X1 [Labrus bergylta]
Dxb_GLEAN_10015036	6.36249e-06	0.000304834	-1.03701	down	Vestigial/Tondu family	Transcription cofactor vestigial-like protein 1 OS=Homo sapiens OX=9606 GN=VGLL1 PE=1 SV=1	Si:dkeyp-11e3.1 OS=Gasterosteus aculeatus OX=69293 PE=4 SV=1	PREDICTED: transcription cofactor vestigial-like protein 1 [Paralichthys olivaceus]
Dxb_GLEAN_10015431	0.000283334	0.00655282	1.16856	up	Protein kinase domain;; Protein tyrosine kinase;; Kinase-like	Serine/threonine-protein kinase SBK1 OS=Danio rerio OX=7955 GN=sbk1 PE=1 SV=1	Serine/threonine-protein kinase SBK1 OS=Larimichthys crocea OX=215358 GN=EH28_04230 PE=3 SV=1	serine/threonine-protein kinase SBK1 isoform X1 [Larimichthys crocea]
Dxb_GLEAN_10015533	9.15361e-14	2.11448e-11	1.44225	up	EGFR receptor inhibitor Mig-6	ERBB receptor feedback inhibitor 1 OS=Mus musculus OX=10090 GN=Errfi1 PE=1 SV=1	Uncharacterized protein OS=Poecilia formosa OX=48698 PE=4 SV=1	ERBB receptor feedback inhibitor 1-like [Parambassis ranga]
Dxb_GLEAN_10015565	0.000126397	0.00341113	1.06194	up	Aminotransferase class I and II;; 5-aminolevulinate synthase presequence;; Cys/Met metabolism PLP-dependent enzyme;; Aminotransferase class-V	5-aminolevulinate synthase, erythroid-specific, mitochondrial OS=Opsanus tau OX=8068 GN=alas2 PE=2 SV=1	Uncharacterized protein OS=Perca flavescens OX=8167 GN=EPR50_G00078100 PE=4 SV=1	hypothetical protein EPR50_G00078100 [Perca flavescens]
Dxb_GLEAN_10015567	1.78605e-05	0.00070013	-1.33882	down	Amino acid permease;; Amino acid permease	Large neutral amino acids transporter small subunit 1 OS=Homo sapiens OX=9606 GN=SLC7A5 PE=1 SV=2	Uncharacterized protein OS=Labrus bergylta OX=56723 PE=4 SV=1	large neutral amino acids transporter small subunit 1-like [Labrus bergylta]
Dxb_GLEAN_10015572	2.06267e-05	0.000784784	1.40576	up	RPEL repeat	Phosphatase and actin regulator 3 OS=Homo sapiens OX=9606 GN=PHACTR3 PE=1 SV=1	Uncharacterized protein OS=Perca flavescens OX=8167 GN=EPR50_G00078040 PE=4 SV=1	phosphatase and actin regulator 3 isoform X1 [Larimichthys crocea]
Dxb_GLEAN_10015604	6.90828e-14	1.63474e-11	-1.13961	down	Hairy Orange;; Helix-loop-helix DNA-binding domain	Transcription factor HES-4-B OS=Xenopus laevis OX=8355 GN=hes4-b PE=1 SV=1	Uncharacterized protein OS=Perca flavescens OX=8167 GN=EPR50_G00077740 PE=4 SV=1	transcription factor HES-4 isoform X1 [Perca flavescens]
Dxb_GLEAN_10015936	4.09962e-09	4.70704e-07	1.0812	up	Aminotransferase class I and II;; 5-aminolevulinate synthase presequence;; Aminotransferase class-V;; Cys/Met metabolism PLP-dependent enzyme	5-aminolevulinate synthase, nonspecific, mitochondrial OS=Opsanus tau OX=8068 GN=alas1 PE=2 SV=1	5-aminolevulinate synthase OS=Seriola lalandi dorsalis OX=1841481 PE=3 SV=1	5-aminolevulinate synthase, nonspecific, mitochondrial-like [Seriola lalandi dorsalis]
Dxb_GLEAN_10015944	1.21234e-10	1.96036e-08	-1.08233	down	Cadherin domain;; Cadherin-like	Cadherin-like protein 26 OS=Homo sapiens OX=9606 GN=CDH26 PE=1 SV=4	Uncharacterized protein OS=Perca flavescens OX=8167 GN=EPR50_G00074270 PE=4 SV=1	hypothetical protein EPR50_G00074270 [Perca flavescens]
Dxb_GLEAN_10015984	1.09827e-05	0.0004694	-1.01385	down	Specifically androgen-regulated gene protein	Specifically androgen-regulated gene protein OS=Mus musculus OX=10090 GN=Sarg PE=1 SV=2	Uncharacterized protein OS=Perca flavescens OX=8167 GN=EPR50_G00073790 PE=4 SV=1	specifically androgen-regulated gene protein-like isoform X1 [Perca flavescens]
Dxb_GLEAN_10016017	1.63726e-27	1.67208e-24	-2.09764	down	Glycosyl hydrolases family 18	Chitinase-3-like protein 1 OS=Sus scrofa OX=9823 GN=CHI3L1 PE=1 SV=2	Chitinase-3-like protein 1 OS=Scophthalmus maximus OX=52904 GN=SMAX5B_019544 PE=3 SV=1	Chitinase-3-like protein 1 [Scophthalmus maximus]
Dxb_GLEAN_10016085	7.05525e-24	4.73967e-21	2.00367	up	Basic region leucine zipper	CCAAT/enhancer-binding protein beta OS=Homo sapiens OX=9606 GN=CEBPB PE=1 SV=2	Uncharacterized protein OS=Acanthochromis polyacanthus OX=80966 PE=4 SV=1	PREDICTED: CCAAT/enhancer-binding protein beta-like [Lates calcarifer]
Dxb_GLEAN_10016107	2.19248e-28	2.50252e-25	2.58258	up	Ligand-binding domain of nuclear hormone receptor;; Zinc finger, C4 type (two domains)	Nuclear receptor subfamily 4 group A member 1 OS=Xenopus laevis OX=8355 GN=nr4a1 PE=2 SV=1	Uncharacterized protein OS=Seriola dumerili OX=41447 PE=3 SV=1	nuclear receptor subfamily 4 group A member 1-like [Perca flavescens]
Dxb_GLEAN_10016246	6.12317e-06	0.000297035	-1.30266	down	Immunoglobulin V-set domain;; Immunoglobulin domain;; Immunoglobulin domain;; Immunoglobulin I-set domain	Polymeric immunoglobulin receptor OS=Mus musculus OX=10090 GN=Pigr PE=1 SV=1	Uncharacterized protein OS=Oreochromis niloticus OX=8128 PE=4 SV=1	PREDICTED: mucin-5AC-like [Lates calcarifer]
Dxb_GLEAN_10016308	8.79286e-05	0.00254879	-1.0457	down	Receptor family ligand binding region;; 7 transmembrane sweet-taste receptor of 3 GCPR;; Nine Cysteines Domain of family 3 GPCR	G-protein coupled receptor family C group 6 member A OS=Danio rerio OX=7955 GN=gprc6a PE=1 SV=1	Uncharacterized protein OS=Anabas testudineus OX=64144 PE=3 SV=1	PREDICTED: G-protein coupled receptor family C group 6 member A isoform X1 [Lates calcarifer]
Dxb_GLEAN_10016341	1.26644e-09	1.63826e-07	1.96076	up	Single-minded protein C-terminus;; PAS fold;; PAS domain;; PAS fold;; Helix-loop-helix DNA-binding domain	Single-minded homolog 1-A OS=Danio rerio OX=7955 GN=sim1a PE=2 SV=1	Uncharacterized protein OS=Perca flavescens OX=8167 GN=EPR50_G00068480 PE=4 SV=1	single-minded homolog 1 isoform X2 [Perca flavescens]
Dxb_GLEAN_10016361	2.65534e-08	2.50118e-06	-1.08443	down	7 transmembrane receptor (rhodopsin family);; Olfactory receptor;; Serpentine type 7TM GPCR chemoreceptor Srsx;; Serpentine type 7TM GPCR chemoreceptor Srx	Melanocortin receptor 5 OS=Pan troglodytes OX=9598 GN=MC5R PE=3 SV=1	Uncharacterized protein OS=Acanthochromis polyacanthus OX=80966 PE=3 SV=1	melanocortin receptor 5-like [Acanthochromis polyacanthus]
Dxb_GLEAN_10016514	6.86763e-06	0.000322998	1.45675	up	Kelch motif;; Kelch motif;; Galactose oxidase, central domain;; Galactose oxidase, central domain;; BTB And C-terminal Kelch;; BTB/POZ domain;; Kelch motif;; Kelch motif	Kelch-like protein 38 OS=Danio rerio OX=7955 GN=klhl38 PE=4 SV=1	Uncharacterized protein OS=Seriola dumerili OX=41447 PE=4 SV=1	kelch-like protein 38 [Seriola dumerili]
Dxb_GLEAN_10016586	9.45605e-09	1.00265e-06	-1.29769	down	SPRY-associated domain;; SPRY domain;; Zinc finger, C3HC4 type (RING finger);; Zinc finger, C3HC4 type (RING finger);; Zinc finger, C3HC4 type (RING finger);; zinc finger of C3HC4-type, RING;; B-box zinc finger;; RING-type zinc-finger	Zinc-binding protein A33 OS=Pleurodeles waltl OX=8319 PE=1 SV=2	Uncharacterized protein OS=Seriola dumerili OX=41447 PE=4 SV=1	nuclear factor 7, brain-like [Seriola dumerili]
Dxb_GLEAN_10016628	1.71802e-10	2.68842e-08	1.57874	up	Glycosyltransferase like family 2;; Chitin synthase;; Glycosyl transferase family group 2;; Glycosyl transferase family 2	Hyaluronan synthase 1 OS=Xenopus laevis OX=8355 GN=has1 PE=1 SV=1	Uncharacterized protein OS=Seriola lalandi dorsalis OX=1841481 PE=4 SV=1	hyaluronan synthase 1 [Seriola lalandi dorsalis]
Dxb_GLEAN_10016630	1.82262e-09	2.31151e-07	1.0132	up	BTG family	Maternal B9.15 protein OS=Xenopus laevis OX=8355 PE=2 SV=1	Uncharacterized protein OS=Perca flavescens OX=8167 GN=EPR50_G00066480 PE=4 SV=1	hypothetical protein EPR50_G00066480 [Perca flavescens]
Dxb_GLEAN_10016694	7.53127e-06	0.000347118	1.42086	up	Hox protein A13 N terminal;; Homeodomain;; Homeobox KN domain	Homeobox protein Hox-A13b OS=Takifugu rubripes OX=31033 GN=hoxa13b PE=3 SV=1	Uncharacterized protein OS=Stegastes partitus OX=144197 PE=4 SV=1	homeobox protein Hox-A13b [Perca flavescens]
Dxb_GLEAN_10016859	0.000330254	0.00734891	1.0978	up	Trypsin	Trypsin-1 OS=Salmo salar OX=8030 PE=1 SV=1	Pancreatic trypsinogen OS=Epinephelus coioides OX=94232 PE=2 SV=1	pancreatic trypsinogen [Epinephelus coioides]
Dxb_GLEAN_10017119	5.33059e-06	0.000267273	1.07803	up	Zinc finger, C4 type (two domains);; Ligand-binding domain of nuclear hormone receptor	Nuclear receptor subfamily 4 group A member 3 OS=Homo sapiens OX=9606 GN=NR4A3 PE=1 SV=3	Uncharacterized protein OS=Amphiprion ocellaris OX=80972 PE=3 SV=1	nuclear receptor subfamily 4 group A member 3 isoform X1 [Larimichthys crocea]
Dxb_GLEAN_10017126	1.19837e-15	3.63331e-13	2.55673	up	MFS/sugar transport protein	Solute carrier family 45 member 4 OS=Homo sapiens OX=9606 GN=SLC45A4 PE=1 SV=2	Uncharacterized protein OS=Perca flavescens OX=8167 GN=EPR50_G00065190 PE=4 SV=1	solute carrier family 45 member 4-like isoform X1 [Perca flavescens]
Dxb_GLEAN_10017260	1.74912e-15	5.1424e-13	1.33129	up	Apoptosis regulator proteins, Bcl-2 family	Induced myeloid leukemia cell differentiation protein Mcl-1 homolog OS=Canis lupus familiaris OX=9615 GN=MCL1 PE=2 SV=1	Uncharacterized protein OS=Perca flavescens OX=8167 GN=EPR50_G00059610 PE=4 SV=1	induced myeloid leukemia cell differentiation protein Mcl-1 homolog [Perca flavescens]
Dxb_GLEAN_10017301	2.19096e-07	1.66719e-05	-1.2395	down	Methyltransferase domain;; Methyltransferase domain;; Methyltransferase domain;; Methyltransferase domain;; ubiE/COQ5 methyltransferase family;; Methyltransferase domain;; Protein of unknown function (DUF1698);; Ribosomal protein L11 methyltransferase (PrmA);; Methionine biosynthesis protein MetW	Methyltransferase-like protein 27 OS=Homo sapiens OX=9606 GN=METTL27 PE=1 SV=2	Uncharacterized protein OS=Maylandia zebra OX=106582 PE=4 SV=1	methyltransferase-like protein 27 [Maylandia zebra]
Dxb_GLEAN_10017374	1.30836e-07	1.06224e-05	1.06146	up	Insulin-like growth factor binding protein;; Cystine-knot domain;; von Willebrand factor type C domain	CCN family member 1 OS=Pan troglodytes OX=9598 GN=CCN1 PE=2 SV=1	Uncharacterized protein OS=Perca flavescens OX=8167 GN=EPR50_G00047490 PE=4 SV=1	protein CYR61 [Larimichthys crocea]
Dxb_GLEAN_10017653	4.94304e-12	9.04856e-10	1.21521	up	A20-like zinc finger;; AN1-like Zinc finger	AN1-type zinc finger protein 5 OS=Homo sapiens OX=9606 GN=ZFAND5 PE=1 SV=1	AN1-type zinc finger protein 5 OS=Larimichthys crocea OX=215358 GN=EH28_12062 PE=4 SV=1	AN1-type zinc finger protein 5 isoform X2 [Larimichthys crocea]
Dxb_GLEAN_10017706	2.62933e-18	1.10912e-15	1.84482	up	Early growth response N-terminal domain;; Zinc-finger double domain;; Zinc finger, C2H2 type;; C2H2-type zinc finger	Early growth response protein 3 OS=Mus musculus OX=10090 GN=Egr3 PE=2 SV=2	Uncharacterized protein OS=Seriola lalandi dorsalis OX=1841481 PE=3 SV=1	PREDICTED: early growth response protein 3 [Lates calcarifer]
Dxb_GLEAN_10017713	6.42883e-09	7.00815e-07	-1.91396	down	Amidohydrolase family;; Amidohydrolase family	Guanine deaminase OS=Homo sapiens OX=9606 GN=GDA PE=1 SV=1	Guanine deaminase OS=Seriola lalandi dorsalis OX=1841481 PE=3 SV=1	PREDICTED: guanine deaminase [Notothenia coriiceps]
Dxb_GLEAN_10017775	8.96381e-06	0.000398931	1.02556	up	impB/mucB/samB family;; impB/mucB/samB family C-terminal domain	DNA polymerase kappa OS=Mus musculus OX=10090 GN=Polk PE=1 SV=1	Uncharacterized protein OS=Perca flavescens OX=8167 GN=EPR50_G00049730 PE=4 SV=1	DNA polymerase kappa [Perca flavescens]
Dxb_GLEAN_10017823	0.000439517	0.00908242	-1.0798	down	Sugar (and other) transporter;; Major Facilitator Superfamily	Solute carrier family 2, facilitated glucose transporter member 11 OS=Homo sapiens OX=9606 GN=SLC2A11 PE=2 SV=1	Solute carrier family 2 (facilitated glucose transporter), member 11b OS=Anabas testudineus OX=64144 PE=3 SV=1	solute carrier family 2, facilitated glucose transporter member 11-like isoform X1 [Mastacembelus armatus]
Dxb_GLEAN_10018003	5.42455e-05	0.00173122	1.07711	up	Phosphatidylinositol-specific phospholipase C, X domain	PI-PLC X domain-containing protein 3 OS=Danio rerio OX=7955 GN=plcxd3 PE=2 SV=1	Uncharacterized protein OS=Labrus bergylta OX=56723 PE=4 SV=1	PI-PLC X domain-containing protein 3 [Larimichthys crocea]
Dxb_GLEAN_10018028	1.65218e-07	1.29793e-05	-1.0712	down	Zinc finger, C2H2 type;; Zinc-finger double domain;; C2H2-type zinc finger;; C2H2-type zinc finger;; Zinc-finger double-stranded RNA-binding	Zinc finger protein 366 OS=Homo sapiens OX=9606 GN=ZNF366 PE=1 SV=1	Uncharacterized protein OS=Perca flavescens OX=8167 GN=EPR50_G00052180 PE=4 SV=1	zinc finger protein 366-like isoform X1 [Perca flavescens]
Dxb_GLEAN_10018070	1.27108e-16	4.18034e-14	1.62131	up	Dual specificity phosphatase, catalytic domain;; Rhodanese-like domain;; Protein-tyrosine phosphatase	Dual specificity protein phosphatase 2 OS=Mus musculus OX=10090 GN=Dusp2 PE=1 SV=2	Uncharacterized protein OS=Amphiprion ocellaris OX=80972 PE=4 SV=1	dual specificity protein phosphatase 2-like [Amphiprion ocellaris]
Dxb_GLEAN_10018136	3.65521e-36	8.86572e-33	1.79612	up	EGF-like domain	Epigen OS=Gallus gallus OX=9031 GN=EPGN PE=2 SV=1	Epigen (Fragment) OS=Epinephelus bruneus OX=323802 PE=2 SV=1	epigen, partial [Epinephelus bruneus]
Dxb_GLEAN_10018250	6.14229e-05	0.00190939	-1.14466	down	SPRY-associated domain;; SPRY domain	Zinc-binding protein A33 OS=Pleurodeles waltl OX=8319 PE=1 SV=2	Uncharacterized protein OS=Maylandia zebra OX=106582 PE=4 SV=1	tripartite motif-containing protein 35-like [Maylandia zebra]
Dxb_GLEAN_10018252	1.01053e-06	6.3871e-05	-1.01501	down	Sulfotransferase domain;; Sulfotransferase family	Heparan sulfate glucosamine 3-O-sulfotransferase 1 OS=Homo sapiens OX=9606 GN=HS3ST1 PE=1 SV=1	Sulfotransferase OS=Amphiprion ocellaris OX=80972 PE=3 SV=1	PREDICTED: heparan sulfate glucosamine 3-O-sulfotransferase 1-like [Lates calcarifer]
Dxb_GLEAN_10018256	1.71413e-12	3.3261e-10	2.31821	up	--	Interleukin-1 beta OS=Oncorhynchus mykiss OX=8022 GN=il1b PE=2 SV=1	Interleukin-1beta (Fragment) OS=Sebastes schlegelii OX=214486 PE=2 SV=1	interleukin-1beta, partial [Sebastes schlegelii]
Dxb_GLEAN_10018346	4.73025e-09	5.2449e-07	1.25876	up	Immunoglobulin domain;; Immunoglobulin V-set domain;; Immunoglobulin domain;; Immunoglobulin I-set domain;; Immunoglobulin domain	--	Uncharacterized protein OS=Astatotilapia calliptera OX=8154 PE=4 SV=1	uncharacterized protein LOC114551247 [Perca flavescens]
Dxb_GLEAN_10018388	2.29614e-05	0.000847039	-1.31033	down	Flavin containing amine oxidoreductase;; NAD(P)-binding Rossmann-like domain;; Pyridine nucleotide-disulphide oxidoreductase;; FAD dependent oxidoreductase;; Pyridine nucleotide-disulphide oxidoreductase;; FAD binding domain;; MCRA family;; FAD binding domain	L-amino-acid oxidase OS=Siganus canaliculatus OX=75042 PE=1 SV=2	Amine oxidase OS=Amphiprion percula OX=161767 PE=3 SV=1	PREDICTED: L-amino-acid oxidase-like isoform X1 [Lates calcarifer]
Dxb_GLEAN_10018675	3.61397e-06	0.000191599	-1.15318	down	HECT-domain (ubiquitin-transferase);; Regulator of chromosome condensation (RCC1) repeat;; Regulator of chromosome condensation (RCC1) repeat;; NACHT domain;; AAA ATPase domain;; Caenorhabditis protein of unknown function, DUF282	NACHT and WD repeat domain-containing protein 2 OS=Homo sapiens OX=9606 GN=NWD2 PE=2 SV=3	Uncharacterized protein OS=Perca flavescens OX=8167 GN=EPR50_G00026270 PE=4 SV=1	hypothetical protein EPR50_G00026270 [Perca flavescens]
Dxb_GLEAN_10018772	1.9538e-08	1.89144e-06	-1.51152	down	Trypsin;; Scavenger receptor cysteine-rich domain;; Hepsin, SRCR domain	Transmembrane protease serine 13 OS=Homo sapiens OX=9606 GN=TMPRSS13 PE=2 SV=5	Transmembrane protease serine 13 OS=Larimichthys crocea OX=215358 GN=EH28_04678 PE=3 SV=1	PREDICTED: transmembrane protease serine 13-like [Lates calcarifer]
Dxb_GLEAN_10018815	3.38757e-40	9.39035e-37	3.17146	up	bZIP transcription factor;; Basic region leucine zipper	Fos-related antigen 2 OS=Gallus gallus OX=9031 GN=FOSL2 PE=1 SV=1	Uncharacterized protein OS=Seriola dumerili OX=41447 PE=4 SV=1	PREDICTED: protein fosB isoform X2 [Lates calcarifer]
Dxb_GLEAN_10019011	3.91111e-11	6.65712e-09	-1.38483	down	PMP-22/EMP/MP20/Claudin family;; PMP-22/EMP/MP20/Claudin tight junction	Claudin-8 OS=Homo sapiens OX=9606 GN=CLDN8 PE=1 SV=1	Uncharacterized protein OS=Perca flavescens OX=8167 GN=EPR50_G00022970 PE=4 SV=1	claudin-8-like [Acanthochromis polyacanthus]
Dxb_GLEAN_10019058	4.22941e-09	4.8275e-07	-1.11077	down	--	--	Putative PR domain zinc finger protein 10-like OS=Scophthalmus maximus OX=52904 GN=SMAX5B_019911 PE=4 SV=1	uncharacterized protein LOC114552848 [Perca flavescens]
Dxb_GLEAN_10019114	3.68215e-05	0.00125348	-1.36791	down	Leucine rich repeat;; Leucine Rich repeats (2 copies);; BspA type Leucine rich repeat region (6 copies);; Leucine-rich repeat;; Leucine Rich Repeat	Insulin-like growth factor-binding protein complex acid labile subunit OS=Papio hamadryas OX=9557 GN=IGFALS PE=2 SV=1	Uncharacterized protein OS=Monopterus albus OX=43700 PE=4 SV=1	PREDICTED: carboxypeptidase N subunit 2-like [Notothenia coriiceps]
Dxb_GLEAN_10019198	0.000326101	0.00728155	1.0558	up	Amino acid kinase family;; Aldehyde dehydrogenase family	Delta-1-pyrroline-5-carboxylate synthase OS=Pongo abelii OX=9601 GN=ALDH18A1 PE=2 SV=1	Uncharacterized protein OS=Perca flavescens OX=8167 GN=EPR50_G00176140 PE=4 SV=1	delta-1-pyrroline-5-carboxylate synthase isoform X1 [Larimichthys crocea]
Dxb_GLEAN_10019245	0.000479553	0.00968288	-1.11824	down	Membrane-associating domain	Myelin and lymphocyte protein OS=Homo sapiens OX=9606 GN=MAL PE=1 SV=1	Mal, T cell differentiation protein a OS=Amphiprion percula OX=161767 PE=4 SV=1	myelin and lymphocyte protein-like [Acanthochromis polyacanthus]
Dxb_GLEAN_10019385	2.97922e-06	0.00016193	-1.09529	down	Mpv17 / PMP22 family	Mpv17-like protein OS=Mus musculus OX=10090 GN=Mpv17l PE=1 SV=2	Uncharacterized protein OS=Amphiprion ocellaris OX=80972 PE=3 SV=1	mpv17-like protein [Acanthochromis polyacanthus]
Dxb_GLEAN_10019495	3.95192e-18	1.63156e-15	1.50863	up	Phosphotyrosine-binding domain;; SH2 domain	Tensin-4 OS=Mus musculus OX=10090 GN=Tns4 PE=2 SV=2	Uncharacterized protein OS=Mastacembelus armatus OX=205130 GN=TNS4 PE=4 SV=1	PREDICTED: tensin-4 isoform X1 [Lates calcarifer]
Dxb_GLEAN_10019607	3.07864e-19	1.38925e-16	2.31417	up	Protein of unknown function (DUF3808)	Tetratricopeptide repeat protein 39B OS=Xenopus tropicalis OX=8364 GN=ttc39b PE=2 SV=1	Uncharacterized protein OS=Seriola lalandi dorsalis OX=1841481 GN=TTC39B PE=4 SV=1	tetratricopeptide repeat protein 39B-like [Perca flavescens]
Dxb_GLEAN_10019673	8.72954e-06	0.000391196	-1.38764	down	FGF binding protein 1 (FGF-BP1)	Fibroblast growth factor-binding protein 1 OS=Rattus norvegicus OX=10116 GN=Fgfbp1 PE=1 SV=1	Fibroblast growth factor-binding protein 1 OS=Larimichthys crocea OX=215358 GN=EH28_03652 PE=4 SV=1	fibroblast growth factor-binding protein 1 [Seriola dumerili]
Dxb_GLEAN_10019798	5.33053e-10	7.44127e-08	-1.70874	down	PAAD/DAPIN/Pyrin domain	--	Caspace-like protein (Fragment) OS=Epinephelus bruneus OX=323802 PE=2 SV=1	caspace-like protein, partial [Epinephelus bruneus]
Dxb_GLEAN_10019924	2.49427e-14	6.28556e-12	1.31189	up	AMP-binding enzyme	Long-chain fatty acid transport protein 1 OS=Rattus norvegicus OX=10116 GN=Slc27a1 PE=2 SV=1	Uncharacterized protein OS=Perca flavescens OX=8167 GN=EPR50_G00014660 PE=4 SV=1	long-chain fatty acid transport protein 1-like [Perca flavescens]
Dxb_GLEAN_10019941	7.8744e-23	4.91134e-20	2.35618	up	Dual specificity phosphatase, catalytic domain;; Rhodanese-like domain;; Protein-tyrosine phosphatase	Dual specificity protein phosphatase 5 OS=Homo sapiens OX=9606 GN=DUSP5 PE=1 SV=2	Dual specificity protein phosphatase OS=Stegastes partitus OX=144197 PE=3 SV=1	PREDICTED: dual specificity protein phosphatase 5 [Stegastes partitus]
Dxb_GLEAN_10020088	7.09175e-08	6.08887e-06	1.76601	up	7 transmembrane receptor (rhodopsin family);; Serpentine type 7TM GPCR chemoreceptor Srsx	Sphingosine 1-phosphate receptor 1 OS=Rattus norvegicus OX=10116 GN=S1pr1 PE=1 SV=1	Uncharacterized protein OS=Perca flavescens OX=8167 GN=EPR50_G00016050 PE=4 SV=1	sphingosine 1-phosphate receptor 1-like [Perca flavescens]
Dxb_GLEAN_10020090	3.99046e-07	2.78528e-05	-1.00406	down	Pannexin-like TM region of LRRC8;; Leucine rich repeat;; Leucine Rich repeats (2 copies);; BspA type Leucine rich repeat region (6 copies);; Leucine Rich Repeat	Volume-regulated anion channel subunit LRRC8C OS=Bos taurus OX=9913 GN=LRRC8C PE=2 SV=1	Uncharacterized protein OS=Seriola dumerili OX=41447 PE=4 SV=1	PREDICTED: volume-regulated anion channel subunit LRRC8C-like [Notothenia coriiceps]
Dxb_GLEAN_10020106	6.86008e-06	0.000322998	1.20315	up	Septin;; 50S ribosome-binding GTPase	Neuronal-specific septin-3 OS=Danio rerio OX=7955 GN=sept3 PE=2 SV=1	Uncharacterized protein OS=Stegastes partitus OX=144197 PE=3 SV=1	PREDICTED: neuronal-specific septin-3 isoform X1 [Stegastes partitus]
Dxb_GLEAN_10020133	1.11531e-05	0.000473555	-1.03339	down	Common central domain of tyrosinase	5,6-dihydroxyindole-2-carboxylic acid oxidase OS=Homo sapiens OX=9606 GN=TYRP1 PE=1 SV=2	Tyrosinase-related protein 1b OS=Lutjanus erythropterus OX=211835 PE=2 SV=1	PREDICTED: 5,6-dihydroxyindole-2-carboxylic acid oxidase-like [Lates calcarifer]
Dxb_GLEAN_10020267	1.43647e-13	3.21052e-11	1.69299	up	Endonuclease/Exonuclease/phosphatase family	Nocturnin OS=Mus musculus OX=10090 GN=Noct PE=1 SV=3	Uncharacterized protein OS=Seriola lalandi dorsalis OX=1841481 PE=4 SV=1	nocturnin-like isoform X1 [Seriola lalandi dorsalis]
Dxb_GLEAN_10020367	1.52815e-06	9.20875e-05	-1.30915	down	Tetratricopeptide repeat	--	Uncharacterized protein OS=Perca flavescens OX=8167 GN=EPR50_G00103220 PE=4 SV=1	interferon-induced protein with tetratricopeptide repeats 1-like [Perca flavescens]
Dxb_GLEAN_10020438	3.27609e-06	0.000177073	1.54774	up	Regulator of G protein signaling domain	Regulator of G-protein signaling 5 OS=Rattus norvegicus OX=10116 GN=Rgs5 PE=2 SV=2	Uncharacterized protein OS=Perca flavescens OX=8167 GN=EPR50_G00102580 PE=4 SV=1	regulator of G-protein signaling 5-like [Perca flavescens]
Dxb_GLEAN_10020445	9.11091e-17	3.21433e-14	1.12572	up	Regulator of G protein signaling domain;; Regulator of G protein signalling-like domain	Regulator of G-protein signaling 21 OS=Homo sapiens OX=9606 GN=RGS21 PE=2 SV=1	Uncharacterized protein OS=Seriola dumerili OX=41447 GN=RGS1 (1 of many) PE=4 SV=1	regulator of G-protein signaling 21-like [Seriola dumerili]
Dxb_GLEAN_10020446	5.61429e-42	2.72349e-38	3.33366	up	Regulator of G protein signaling domain	Regulator of G-protein signaling 2 OS=Mus musculus OX=10090 GN=Rgs2 PE=2 SV=2	Uncharacterized protein OS=Stegastes partitus OX=144197 PE=4 SV=1	PREDICTED: regulator of G-protein signaling 5-like [Stegastes partitus]
Dxb_GLEAN_10020478	0.00023472	0.00562284	1.19294	up	--	Small RNA 2'-O-methyltransferase OS=Danio rerio OX=7955 GN=henmt1 PE=1 SV=2	Uncharacterized protein OS=Perca flavescens OX=8167 GN=EPR50_G00102120 PE=4 SV=1	small RNA 2'-O-methyltransferase isoform X1 [Perca flavescens]
Dxb_GLEAN_10020530	1.65084e-13	3.5992e-11	1.18554	up	Cystine-knot domain;; Insulin-like growth factor binding protein;; von Willebrand factor type C domain;; Thrombospondin type 1 domain	CCN family member 1 OS=Gallus gallus OX=9031 GN=CCN1 PE=2 SV=1	Uncharacterized protein OS=Amphiprion ocellaris OX=80972 PE=4 SV=1	protein CYR61 [Amphiprion ocellaris]
Dxb_GLEAN_10020578	1.26711e-16	4.18034e-14	1.68077	up	Animal haem peroxidase	Prostaglandin G/H synthase 2 OS=Cavia porcellus OX=10141 GN=PTGS2 PE=2 SV=1	Uncharacterized protein OS=Seriola dumerili OX=41447 PE=4 SV=1	prostaglandin G/H synthase 2 [Seriola dumerili]
Dxb_GLEAN_10020618	4.38772e-13	9.15477e-11	-1.12713	down	Arrestin (or S-antigen), N-terminal domain;; Arrestin (or S-antigen), C-terminal domain;; Vacuolar protein sorting-associated protein 26	Arrestin domain-containing protein 2 OS=Homo sapiens OX=9606 GN=ARRDC2 PE=1 SV=2	Uncharacterized protein OS=Amphiprion ocellaris OX=80972 PE=4 SV=1	arrestin domain-containing protein 2 isoform X2 [Larimichthys crocea]
Dxb_GLEAN_10020668	2.32169e-07	1.75977e-05	-1.23852	down	Sodium:solute symporter family	Sodium/iodide cotransporter OS=Rattus norvegicus OX=10116 GN=Slc5a5 PE=2 SV=1	Uncharacterized protein OS=Perca flavescens OX=8167 GN=EPR50_G00100360 PE=4 SV=1	PREDICTED: LOW QUALITY PROTEIN: sodium/iodide cotransporter [Lates calcarifer]
Dxb_GLEAN_10020699	9.52658e-07	6.08071e-05	-1.36094	down	Zinc-binding domain	Receptor-transporting protein 3 OS=Mus musculus OX=10090 GN=Rtp3 PE=1 SV=2	Uncharacterized protein OS=Perca flavescens OX=8167 GN=EPR50_G00099910 PE=4 SV=1	receptor-transporting protein 3-like [Perca flavescens]
Dxb_GLEAN_10020718	0.000253953	0.0060094	-1.11851	down	Domain of unknown function (DUF4630)	--	Uncharacterized protein OS=Perca flavescens OX=8167 GN=EPR50_G00099800 PE=4 SV=1	uncharacterized protein LOC114561750 isoform X1 [Perca flavescens]
Dxb_GLEAN_10020825	1.3679e-16	4.42378e-14	1.62944	up	Protein tyrosine kinase;; Protein kinase domain;; F-actin binding;; SH2 domain;; SH3 domain;; Variant SH3 domain	Tyrosine-protein kinase ABL2 OS=Mus musculus OX=10090 GN=Abl2 PE=1 SV=1	Tyrosine-protein kinase OS=Larimichthys crocea OX=215358 GN=EH28_11922 PE=3 SV=1	tyrosine-protein kinase ABL2 isoform X1 [Larimichthys crocea]
Dxb_GLEAN_10020887	9.02877e-15	2.39992e-12	1.7117	up	Sushi repeat (SCR repeat)	P-selectin OS=Homo sapiens OX=9606 GN=SELP PE=1 SV=3	Uncharacterized protein OS=Perca flavescens OX=8167 GN=EPR50_G00098070 PE=4 SV=1	E-selectin-like [Perca flavescens]
Dxb_GLEAN_10020982	6.30653e-13	1.26157e-10	1.52755	up	Ubiquitin family	Midnolin OS=Danio rerio OX=7955 GN=midn PE=2 SV=1	midnolin-like OS=Ictalurus punctatus OX=7998 GN=LOC108271022 PE=4 SV=1	PREDICTED: midnolin-like [Ictalurus punctatus]
Dxb_GLEAN_10021048	1.34341e-20	6.51689e-18	1.02598	up	Jun-like transcription factor;; bZIP transcription factor;; bZIP Maf transcription factor;; Basic region leucine zipper	Transcription factor AP-1 OS=Serinus canaria OX=9135 GN=JUN PE=2 SV=1	C-Jun OS=Epinephelus coioides OX=94232 PE=2 SV=1	c-Jun [Epinephelus coioides]
Dxb_GLEAN_10021072	2.98541e-07	2.19364e-05	-1.28948	down	Proprotein convertase subtilisin-like/kexin type 9 C-terminal domain;; Proprotein convertase subtilisin-like/kexin type 9 C-terminal domain;; Subtilase family	Proprotein convertase subtilisin/kexin type 9 OS=Pan troglodytes OX=9598 GN=PCSK9 PE=2 SV=1	Uncharacterized protein OS=Stegastes partitus OX=144197 PE=3 SV=1	proprotein convertase subtilisin/kexin type 9 [Larimichthys crocea]
Dxb_GLEAN_10021185	5.36454e-14	1.28511e-11	1.06837	up	Angiomotin C terminal	Angiomotin-like 2a OS=Danio rerio OX=7955 GN=amotl2a PE=1 SV=2	Uncharacterized protein OS=Seriola lalandi dorsalis OX=1841481 PE=4 SV=1	angiomotin-like 2a isoform X2 [Seriola lalandi dorsalis]
Dxb_GLEAN_10021209	2.99262e-05	0.00106548	-1.34731	down	Zinc-finger double domain;; Zinc finger, C2H2 type;; C2H2-type zinc finger;; Zinc-finger double-stranded RNA-binding;; C2H2-type zinc finger	Zinc finger protein 648 OS=Homo sapiens OX=9606 GN=ZNF648 PE=2 SV=1	Uncharacterized protein OS=Seriola lalandi dorsalis OX=1841481 PE=4 SV=1	zinc finger protein 648 [Larimichthys crocea]
Dxb_GLEAN_10021244	3.0813e-05	0.00109305	-1.33436	down	PAAD/DAPIN/Pyrin domain;; SAM domain (Sterile alpha motif);; Sterile alpha motif (SAM)/Pointed domain;; SAM domain (Sterile alpha motif)	Sterile alpha motif domain-containing protein 9 OS=Homo sapiens OX=9606 GN=SAMD9 PE=1 SV=1	Uncharacterized protein OS=Seriola lalandi dorsalis OX=1841481 PE=4 SV=1	uncharacterized protein LOC109139682 [Larimichthys crocea]
Dxb_GLEAN_10021263	4.42288e-10	6.35715e-08	1.09025	up	Survival motor neuron protein (SMN);; Ribosomal protein L7Ae/L30e/S12e/Gadd45 family;; DNA repair protein Crb2 Tudor domain;; mbt repeat;; Tudor domain	Growth arrest and DNA damage-inducible protein GADD45 beta OS=Homo sapiens OX=9606 GN=GADD45B PE=1 SV=1	Uncharacterized protein OS=Anabas testudineus OX=64144 PE=4 SV=1	growth arrest and DNA damage-inducible protein GADD45 beta [Anabas testudineus]
Dxb_GLEAN_10021354	4.49542e-12	8.30754e-10	1.2527	up	Laminin EGF domain;; Laminin N-terminal (Domain VI)	Laminin subunit beta-3 OS=Homo sapiens OX=9606 GN=LAMB3 PE=1 SV=1	Putative laminin subunit beta-3 OS=Scophthalmus maximus OX=52904 GN=SMAX5B_011249 PE=4 SV=1	putative laminin subunit beta-3 [Scophthalmus maximus]
Dxb_GLEAN_10021475	3.2236e-09	3.90942e-07	1.48228	up	Thyroglobulin type-1 repeat	Insulin-like growth factor-binding protein 6 OS=Bos taurus OX=9913 GN=IGFBP6 PE=2 SV=2	Uncharacterized protein OS=Stegastes partitus OX=144197 PE=4 SV=1	PREDICTED: insulin-like growth factor-binding protein 3 [Stegastes partitus]
Dxb_GLEAN_10021488	2.8106e-12	5.3997e-10	-1.25863	down	PKD domain	Melanocyte protein PMEL OS=Gallus gallus OX=9031 GN=PMEL PE=1 SV=3	Melanocyte protein PMEL OS=Larimichthys crocea OX=215358 GN=EH28_08814 PE=4 SV=1	melanocyte protein PMEL [Larimichthys crocea]
Dxb_GLEAN_10021506	2.14594e-09	2.70389e-07	1.54579	up	Ligand-binding domain of nuclear hormone receptor;; Zinc finger, C4 type (two domains)	Nuclear receptor subfamily 4 group A member 1 OS=Xenopus laevis OX=8355 GN=nr4a1 PE=2 SV=1	Uncharacterized protein OS=Seriola dumerili OX=41447 GN=NR4A1 PE=3 SV=1	PREDICTED: probable nuclear hormone receptor HR38 [Lates calcarifer]
Dxb_GLEAN_10021523	4.40545e-05	0.00146125	-1.17164	down	Sodium:neurotransmitter symporter family	Sodium- and chloride-dependent neutral and basic amino acid transporter B(0+) OS=Homo sapiens OX=9606 GN=SLC6A14 PE=2 SV=1	Transporter OS=Stegastes partitus OX=144197 PE=3 SV=1	sodium- and chloride-dependent neutral and basic amino acid transporter B(0+) [Amphiprion ocellaris]
Dxb_GLEAN_10021525	0.000300113	0.00681099	1.0882	up	Leucine rich repeat;; Leucine Rich repeats (2 copies);; Leucine Rich Repeat;; Leucine Rich repeat;; Leucine-rich repeat;; Leucine rich repeat N-terminal domain	Fibromodulin OS=Gallus gallus OX=9031 GN=FMOD PE=2 SV=1	Uncharacterized protein OS=Perca flavescens OX=8167 GN=EPR50_G00041400 PE=4 SV=1	fibromodulin-like [Perca flavescens]
Dxb_GLEAN_10021701	2.61455e-06	0.000145366	1.53817	up	CIDE-N domain	Cell death activator CIDE-3 OS=Rattus norvegicus OX=10116 GN=Cidec PE=1 SV=1	Uncharacterized protein OS=Perca flavescens OX=8167 GN=EPR50_G00043420 PE=4 SV=1	PREDICTED: cell death activator CIDE-3-like [Lates calcarifer]
Dxb_GLEAN_10021723	5.3043e-05	0.00169563	-1.03604	down	Opioid growth factor receptor (OGFr) conserved region	Opioid growth factor receptor OS=Rattus norvegicus OX=10116 GN=Ogfr PE=1 SV=1	Uncharacterized protein OS=Perca flavescens OX=8167 GN=EPR50_G00043660 PE=4 SV=1	opioid growth factor receptor-like [Perca flavescens]
Dxb_GLEAN_10021733	9.971e-09	1.05151e-06	1.34996	up	SH2 domain	Src-like-adapter 2 OS=Mus musculus OX=10090 GN=Sla2 PE=1 SV=3	Src-like-adaptor 2 OS=Dicentrarchus labrax OX=13489 GN=SLA2 PE=4 SV=1	Src-like-adaptor 2 [Dicentrarchus labrax]
Dxb_GLEAN_10021923	5.61125e-09	6.15146e-07	1.22876	up	Transglutaminase family;; Transglutaminase-like superfamily;; Transglutaminase family, C-terminal ig like domain	Protein-glutamine gamma-glutamyltransferase 5 OS=Homo sapiens OX=9606 GN=TGM5 PE=1 SV=4	Uncharacterized protein OS=Perca flavescens OX=8167 GN=EPR50_G00036740 PE=4 SV=1	protein-glutamine gamma-glutamyltransferase 5-like [Perca flavescens]
Dxb_GLEAN_10021949	1.834e-24	1.42348e-21	1.98177	up	PRELI-like family	PRELI domain containing protein 3B OS=Macaca fascicularis OX=9541 GN=PRELID3B PE=2 SV=1	Protein slowmo OS=Larimichthys crocea OX=215358 GN=EH28_03673 PE=4 SV=1	PRELI domain containing protein 3B-like isoform X2 [Larimichthys crocea]
Dxb_GLEAN_10021965	2.50707e-10	3.74208e-08	1.02389	up	--	DNA damage-inducible transcript 3 protein OS=Homo sapiens OX=9606 GN=DDIT3 PE=1 SV=1	DNA damage-inducible transcript 3 OS=Dicentrarchus labrax OX=13489 GN=DDIT3 PE=4 SV=1	DNA damage-inducible transcript 3 [Dicentrarchus labrax]
Dxb_GLEAN_10022068	2.31353e-19	1.06885e-16	1.69712	up	Protein tyrosine kinase;; Ephrin receptor ligand binding domain;; Protein kinase domain;; Fibronectin type III domain;; SAM domain (Sterile alpha motif);; Ephrin type-A receptor 2 transmembrane domain;; SAM domain (Sterile alpha motif)	Ephrin type-A receptor 2 OS=Macaca fascicularis OX=9541 GN=EPHA2 PE=2 SV=1	Uncharacterized protein OS=Perca flavescens OX=8167 GN=EPR50_G00038200 PE=4 SV=1	ephrin type-A receptor 2-like isoform X1 [Perca flavescens]
Dxb_GLEAN_10022129	0.000291927	0.00669186	1.20502	up	Myosin tail	Myosin heavy chain, fast skeletal muscle OS=Cyprinus carpio OX=7962 PE=2 SV=2	Uncharacterized protein OS=Labrus bergylta OX=56723 PE=3 SV=1	PREDICTED: myosin heavy chain, fast skeletal muscle-like [Lates calcarifer]
Dxb_GLEAN_10022161	1.23155e-09	1.61466e-07	-1.53071	down	Vault protein inter-alpha-trypsin domain;; von Willebrand factor type A domain;; von Willebrand factor type A domain;; von Willebrand factor type A domain;; VWA domain containing CoxE-like protein	Inter-alpha-trypsin inhibitor heavy chain H3 OS=Mesocricetus auratus OX=10036 GN=ITIH3 PE=1 SV=1	Uncharacterized protein OS=Oreochromis niloticus OX=8128 PE=4 SV=1	inter-alpha-trypsin inhibitor heavy chain H3-like isoform X3 [Seriola dumerili]
Dxb_GLEAN_10022254	4.14803e-10	6.03447e-08	-1.4377	down	--	Kelch domain-containing protein 7A OS=Mus musculus OX=10090 GN=Klhdc7a PE=1 SV=3	Kelch domain-containing protein 7A OS=Larimichthys crocea OX=215358 GN=EH28_01719 PE=4 SV=1	kelch domain-containing protein 7A [Larimichthys crocea]
Dxb_GLEAN_10022273	5.72507e-06	0.00028267	-1.50747	down	Phosphorylase superfamily	Purine nucleoside phosphorylase OS=Bos taurus OX=9913 GN=PNP PE=1 SV=3	Purine nucleoside phosphorylase OS=Acanthochromis polyacanthus OX=80966 PE=3 SV=1	purine nucleoside phosphorylase-like [Parambassis ranga]
Dxb_GLEAN_10022275	4.41333e-16	1.38123e-13	1.53238	up	Protein kinase domain;; Protein tyrosine kinase	Tribbles homolog 2 OS=Homo sapiens OX=9606 GN=TRIB2 PE=1 SV=1	Uncharacterized protein OS=Perca flavescens OX=8167 GN=EPR50_G00035380 PE=4 SV=1	tribbles homolog 2-like [Perca flavescens]
Dxb_GLEAN_10022320	3.95464e-06	0.000206835	-1.05485	down	--	--	Uncharacterized protein (Fragment) OS=Perca flavescens OX=8167 GN=EPR50_G00093070 PE=4 SV=1	mucin-5AC-like [Perca flavescens]
Dxb_GLEAN_10022324	1.45658e-05	0.000588821	-1.06067	down	C1q domain;; Collagen triple helix repeat (20 copies)	Complement C1q subcomponent subunit C OS=Rattus norvegicus OX=10116 GN=C1qc PE=1 SV=2	Complement component 1qC-like protein OS=Oplegnathus fasciatus OX=163134 GN=RbC1qCL PE=2 SV=1	complement component 1qC-like protein [Oplegnathus fasciatus]
Dxb_GLEAN_10022359	6.54361e-22	3.52701e-19	2.35268	up	Agouti protein	Agouti-signaling protein OS=Callithrix jacchus OX=9483 GN=ASIP PE=3 SV=1	Uncharacterized protein OS=Seriola dumerili OX=41447 PE=4 SV=1	PREDICTED: agouti-signaling protein-like [Paralichthys olivaceus]
Dxb_GLEAN_10022543	8.06779e-06	0.000368667	1.27858	up	GTP cyclohydrolase I	GTP cyclohydrolase 1 OS=Gallus gallus OX=9031 GN=GCH1 PE=2 SV=1	GTP cyclohydrolase 1 OS=Iconisemion striatum OX=60296 GN=GCH1 PE=3 SV=1	PREDICTED: GTP cyclohydrolase 1-like [Lates calcarifer]
Dxb_GLEAN_10022599	1.13469e-07	9.40559e-06	1.28911	up	Fibroblast growth factor	Fibroblast growth factor 7 OS=Canis lupus familiaris OX=9615 GN=FGF7 PE=2 SV=1	Fibroblast growth factor OS=Stegastes partitus OX=144197 PE=3 SV=1	PREDICTED: fibroblast growth factor 7 [Stegastes partitus]
Dxb_GLEAN_10022627	0.000293735	0.00671336	-1.04045	down	--	Glycine amidinotransferase, mitochondrial OS=Danio rerio OX=7955 GN=gatm PE=2 SV=1	Uncharacterized protein OS=Amphiprion ocellaris OX=80972 PE=4 SV=1	glycine amidinotransferase, mitochondrial [Amphiprion ocellaris]
Dxb_GLEAN_10022801	3.31293e-09	3.9928e-07	1.28743	up	Extracellular link domain	Lymphatic vessel endothelial hyaluronic acid receptor 1 OS=Mus musculus OX=10090 GN=Lyve1 PE=1 SV=1	Uncharacterized protein OS=Perca flavescens OX=8167 GN=EPR50_G00004370 PE=4 SV=1	lymphatic vessel endothelial hyaluronic acid receptor 1 [Perca flavescens]
Dxb_GLEAN_10022956	3.87478e-06	0.000203206	-1.32398	down	SPRY-associated domain;; SPRY domain;; Zinc finger, C3HC4 type (RING finger);; zinc finger of C3HC4-type, RING;; Zinc finger, C3HC4 type (RING finger);; Zinc finger, C3HC4 type (RING finger);; RING-type zinc-finger;; zinc-RING finger domain	Zinc-binding protein A33 OS=Pleurodeles waltl OX=8319 PE=1 SV=2	Uncharacterized protein OS=Pundamilia nyererei OX=303518 PE=4 SV=1	uncharacterized protein LOC114441209 [Parambassis ranga]
Dxb_GLEAN_10023095	1.49535e-06	9.0674e-05	1.53869	up	Zinc finger, C2H2 type;; C2H2-type zinc finger;; Zinc-finger of C2H2 type;; Zinc-finger double domain;; Zinc-finger double-stranded RNA-binding;; C2H2-type zinc finger	Sal-like protein 1 OS=Homo sapiens OX=9606 GN=SALL1 PE=1 SV=2	Uncharacterized protein OS=Amphiprion ocellaris OX=80972 PE=4 SV=1	PREDICTED: sal-like protein 1 [Lates calcarifer]
Dxb_GLEAN_10023126	1.60905e-09	2.05408e-07	-1.2595	down	Cytochrome P450	Cytochrome P450 1A1 OS=Limanda limanda OX=27771 GN=cyp1a1 PE=2 SV=1	Cytochrome P450 OS=Lateolabrax japonicus OX=8164 GN=CYP1A PE=2 SV=1	CYP1A [Lateolabrax japonicus]
Trans_newGene_10290	0.000269306	0.00629592	1.1634	up	PDZ domain;; PDZ domain;; PDZ domain	--	--	PREDICTED: T-lymphoma invasion and metastasis-inducing protein 2-like isoform X2 [Austrofundulus limnaeus]
Trans_newGene_10501	2.27348e-05	0.000840279	-1.40986	down
Trans_newGene_1065	3.78856e-06	0.000199764	-1.03767	down	u-PAR/Ly-6 domain	--	--	hypothetical protein EPR50_G00147200 [Perca flavescens]
Trans_newGene_10708	8.82607e-05	0.00254879	-1.06094	down	Zona pellucida-like domain	CUB and zona pellucida-like domain-containing protein 1 OS=Homo sapiens OX=9606 GN=CUZD1 PE=2 SV=1	--	PREDICTED: uncharacterized protein LOC108894180 isoform X2 [Lates calcarifer]
Trans_newGene_1096	5.01173e-05	0.00161541	1.1975	up
Trans_newGene_11189	0.000264342	0.00623244	-1.08256	down	Fish-specific NACHT associated domain;; NACHT domain	NACHT, LRR and PYD domains-containing protein 3 OS=Bos taurus OX=9913 GN=NLRP3 PE=2 SV=1	--	protein NLRC3 [Larimichthys crocea]
Trans_newGene_11312	0.000235994	0.00564181	-1.215	down	--	Deoxynucleoside triphosphate triphosphohydrolase SAMHD1 OS=Danio rerio OX=7955 GN=samhd1 PE=2 SV=2	--	PREDICTED: LOW QUALITY PROTEIN: deoxynucleoside triphosphate triphosphohydrolase SAMHD1-like, partial [Lates calcarifer]
Trans_newGene_11904	0.00049807	0.00998405	-1.06082	down	--	--	--	hypothetical protein EPR50_G00241990, partial [Perca flavescens]
Trans_newGene_11945	0.000120519	0.00328447	1.27968	up	Angiotensin-converting enzyme	Angiotensin-converting enzyme (Fragment) OS=Gallus gallus OX=9031 GN=ACE PE=2 SV=1	--	angiotensin-converting enzyme [Larimichthys crocea]
Trans_newGene_12081	0.000136272	0.003641	-1.0273	down	--	Angiotensin-converting enzyme (Fragment) OS=Gallus gallus OX=9031 GN=ACE PE=2 SV=1	--	angiotensin-converting enzyme-like [Oryzias latipes]
Trans_newGene_1215	3.01037e-07	2.19599e-05	-1.24123	down	--	--	--	PREDICTED: uncharacterized protein LOC108872587 isoform X6 [Lates calcarifer]
Trans_newGene_12223	2.91378e-06	0.000159265	1.54158	up	FG-GAP repeat	Integrin alpha-6 OS=Gallus gallus OX=9031 GN=ITGA6 PE=2 SV=1	--	integrin alpha-6-like isoform X1 [Gouania willdenowi]
Trans_newGene_12420	2.94163e-06	0.000160335	-1.50521	down	--	Interferon-induced protein 44 OS=Mus musculus OX=10090 GN=Ifi44 PE=2 SV=1	--	interferon-induced protein 44 [Larimichthys crocea]
Trans_newGene_12442	0.00015973	0.00412702	-1.21879	down	--	Dehydrogenase/reductase SDR family member 1 OS=Mus musculus OX=10090 GN=Dhrs1 PE=1 SV=1	--	PREDICTED: dehydrogenase/reductase SDR family member 1 [Lates calcarifer]
Trans_newGene_12466	4.76546e-05	0.00155149	-1.07426	down	--	--	--	cystatin-A5, partial [Epinephelus bruneus]
Trans_newGene_12534	2.38544e-06	0.000134948	-1.2324	down	--	--	--	protein FAM111A-like [Mastacembelus armatus]
Trans_newGene_126	9.90626e-05	0.00280615	-1.17343	down
Trans_newGene_12759	0.000494626	0.00992526	-1.00163	down	Immunoglobulin V-set domain;; Immunoglobulin domain;; Immunoglobulin I-set domain;; Immunoglobulin domain;; CD47 immunoglobulin-like domain;; Immunoglobulin domain	Myelin-oligodendrocyte glycoprotein OS=Rattus norvegicus OX=10116 GN=Mog PE=1 SV=1	--	V-set domain containing T-cell activation inhibitor 1-like isoform X1 [Perca flavescens]
Trans_newGene_13096	2.46865e-07	1.85666e-05	-1.51365	down	7 transmembrane receptor (rhodopsin family)	Chemokine XC receptor 1 OS=Homo sapiens OX=9606 GN=XCR1 PE=1 SV=1	--	XCR1 [Epinephelus coioides]
Trans_newGene_1329	1.891e-07	1.46187e-05	-1.73348	down	Choline/Carnitine o-acyltransferase;; Choline/Carnitine o-acyltransferase	Carnitine O-acetyltransferase OS=Rattus norvegicus OX=10116 GN=Crat PE=1 SV=1	--	PREDICTED: carnitine O-acetyltransferase-like isoform X2 [Lates calcarifer]
Trans_newGene_13857	2.13588e-05	0.000801616	-1.04764	down
Trans_newGene_14005	8.31378e-08	7.01394e-06	1.69387	up	--	Myosin heavy chain, fast skeletal muscle OS=Cyprinus carpio OX=7962 PE=2 SV=2	--	myosin heavy chain, fast skeletal muscle-like [Perca flavescens]
Trans_newGene_14204	2.01848e-24	1.50641e-21	-2.30288	down	Lectin C-type domain	Macrophage mannose receptor 1 OS=Homo sapiens OX=9606 GN=MRC1 PE=1 SV=1	--	ladderlectin-like isoform X1 [Xiphophorus couchianus]
Trans_newGene_1918	5.67727e-08	5.00454e-06	-1.11817	down	Gamma-glutamyl cyclotransferase, AIG2-like	Gamma-glutamylaminecyclotransferase B OS=Danio rerio OX=7955 GN=ggact.2 PE=2 SV=1	--	gamma-glutamylaminecyclotransferase isoform X1 [Perca flavescens]
Trans_newGene_1936	8.86669e-07	5.71592e-05	1.25282	up	Beta/Gamma crystallin	Gamma-crystallin M2 OS=Chiloscyllium indicum OX=443761 GN=GM2 PE=2 SV=2	--	gamma-crystallin M2-like isoform X2 [Monopterus albus]
Trans_newGene_1941	1.48235e-15	4.42515e-13	-1.17435	down	Immunoglobulin domain;; Immunoglobulin I-set domain;; Immunoglobulin domain;; Immunoglobulin domain	--	--	PREDICTED: T-cell surface antigen CD2 [Lates calcarifer]
Trans_newGene_2068	1.32355e-10	2.10509e-08	1.86152	up	short chain dehydrogenase;; Enoyl-(Acyl carrier protein) reductase;; KR domain;; Fungal family of unknown function (DUF1776)	D-beta-hydroxybutyrate dehydrogenase, mitochondrial OS=Bos taurus OX=9913 GN=BDH1 PE=1 SV=2	--	PREDICTED: D-beta-hydroxybutyrate dehydrogenase, mitochondrial-like [Lates calcarifer]
Trans_newGene_2548	3.39109e-05	0.00117711	-1.34854	down	--	--	--	uncharacterized protein LOC112848003 [Oreochromis niloticus]
Trans_newGene_2568	8.18491e-05	0.00240272	-1.23994	down	--	--	--	ribonuclease Oy-like [Larimichthys crocea]
Trans_newGene_2751	1.96903e-08	1.89144e-06	-1.5227	down
Trans_newGene_3001	2.67284e-07	1.99476e-05	-1.07924	down	--	Galactose-specific lectin nattectin OS=Thalassophryne nattereri OX=289382 PE=1 SV=1	--	nattectin, partial [Epinephelus bruneus]
Trans_newGene_3002	4.89029e-06	0.000249058	-1.51834	down	--	--	--	PREDICTED: L-rhamnose-binding lectin CSL2-like [Paralichthys olivaceus]
Trans_newGene_3016	0.000365913	0.00796878	-1.1479	down
Trans_newGene_3023	1.69199e-05	0.000668571	-1.21438	down
Trans_newGene_3134	2.55251e-05	0.000925775	1.2514	up	--	--	--	thymosin beta-like [Seriola lalandi dorsalis]
Trans_newGene_3279	7.62785e-11	1.24793e-08	-2.16144	down	--	Keratin, type I cytoskeletal 13 OS=Oncorhynchus mykiss OX=8022 GN=krt13 PE=2 SV=1	--	cytokeratin, partial [Cyprinus carpio]
Trans_newGene_3308	2.24273e-05	0.00083063	-1.13399	down
Trans_newGene_3439	5.53733e-08	4.90622e-06	-1.03931	down	Lectin C-type domain	Ladderlectin OS=Oncorhynchus mykiss OX=8022 PE=1 SV=2	--	lactose-binding lectin l-2-like, partial [Scleropages formosus]
Trans_newGene_348	8.82696e-05	0.00254879	1.28323	up
Trans_newGene_3498	2.19351e-05	0.000818515	-1.01266	down	SOUL heme-binding protein	--	--	hypothetical protein EPR50_G00174530 [Perca flavescens]
Trans_newGene_3772	7.08361e-24	4.73967e-21	2.89514	up	--	--	--	regulator of G-protein signaling 21-like [Perca flavescens]
Trans_newGene_4155	0.000177107	0.00448056	-1.0634	down	--	Versican core protein OS=Bos taurus OX=9913 GN=VCAN PE=1 SV=2	--	lectin-like [Seriola lalandi dorsalis]
Trans_newGene_4225	7.65323e-11	1.24793e-08	2.02675	up	Secreted Novel AID/APOBEC-like Deaminase 1;; Secreted Novel AID/APOBEC-like Deaminase 2	--	--	uncharacterized protein LOC111232928 [Seriola dumerili]
Trans_newGene_4232	6.13031e-13	1.23909e-10	1.36938	up	--	--	--	hypothetical protein EPR50_G00001680 [Perca flavescens]
Trans_newGene_4518	5.16529e-08	4.64015e-06	-1.32858	down	Sodium:solute symporter family	Sodium/myo-inositol cotransporter OS=Bos taurus OX=9913 GN=SLC5A3 PE=3 SV=1	--	PREDICTED: sodium/myo-inositol cotransporter-like [Paralichthys olivaceus]
Trans_newGene_4527	8.00296e-05	0.00236002	-1.07795	down	Putative zinc-finger domain	Zinc finger C3H1 domain-containing protein OS=Homo sapiens OX=9606 GN=ZFC3H1 PE=1 SV=3	--	PREDICTED: zinc finger C3H1 domain-containing protein-like, partial [Paralichthys olivaceus]
Trans_newGene_4971	5.70548e-05	0.00180602	-1.20349	down	--	--	--	LOW QUALITY PROTEIN: interferon-induced very large GTPase 1-like [Seriola dumerili]
Trans_newGene_568	1.07173e-06	6.70833e-05	1.4156	up
Trans_newGene_606	5.48431e-07	3.65696e-05	-1.22664	down
Trans_newGene_6252	4.70565e-25	3.80452e-22	-3.37543	down	--	--	--	uncharacterized protein LOC111948851 [Oryzias latipes]
Trans_newGene_6286	4.2612e-06	0.000221081	-1.52332	down	Fibrinogen beta and gamma chains, C-terminal globular domain	--	--	PREDICTED: microfibril-associated glycoprotein 4-like isoform X9 [Lates calcarifer]
Trans_newGene_6297	2.03489e-07	1.55453e-05	-1.47331	down	Fibronectin type III domain;; Interferon-alpha/beta receptor, fibronectin type III	Up-regulator of cell proliferation OS=Pongo abelii OX=9601 GN=URGCP PE=2 SV=1	--	interferon-induced very large GTPase 1 [Larimichthys crocea]
Trans_newGene_6511	0.000402282	0.0085779	-1.14354	down	Fibronectin type III domain	Interferon-induced very large GTPase 1 OS=Homo sapiens OX=9606 GN=GVINP1 PE=2 SV=2	--	interferon-induced very large GTPase 1-like [Perca flavescens]
Trans_newGene_6584	1.01559e-05	0.000441849	-1.05924	down	--	--	--	hypothetical protein EPR50_G00117080 [Perca flavescens]
Trans_newGene_6725	8.48086e-05	0.00247463	-1.10556	down	--	Vacuolar protein sorting-associated protein 52 homolog OS=Homo sapiens OX=9606 GN=VPS52 PE=1 SV=1	--	PREDICTED: vacuolar protein sorting-associated protein 52 homolog [Nothobranchius furzeri]
Trans_newGene_679	2.76348e-06	0.000152337	1.20117	up	--	--	--	PREDICTED: endothelial PAS domain-containing protein 1-like [Lates calcarifer]
Trans_newGene_698	3.78576e-05	0.001282	1.1163	up	EMI domain	Multimerin-2 OS=Homo sapiens OX=9606 GN=MMRN2 PE=1 SV=2	--	multimerin-2 [Perca flavescens]
Trans_newGene_6991	0.00029045	0.00666968	-1.2059	down	--	Transmembrane protease serine 3 OS=Homo sapiens OX=9606 GN=TMPRSS3 PE=1 SV=2	--	hypothetical protein EPR50_G00025740, partial [Perca flavescens]
Trans_newGene_7231	4.55351e-13	9.39961e-11	-2.37203	down
Trans_newGene_7421	4.49384e-12	8.30754e-10	-2.30249	down	--	--	--	uncharacterized protein LOC104938579 [Larimichthys crocea]
Trans_newGene_779	5.29075e-12	9.59455e-10	-1.5864	down	--	Stefin-C OS=Bos taurus OX=9913 PE=1 SV=1	--	cystatin-A5, partial [Epinephelus bruneus]
Trans_newGene_794	2.2335e-06	0.000127094	-1.30708	down
Trans_newGene_7967	6.07027e-05	0.0018998	-1.07609	down
Trans_newGene_7998	2.84978e-14	6.99964e-12	-1.46147	down
Trans_newGene_803	4.67288e-05	0.00153668	-1.17734	down
Trans_newGene_8308	5.49538e-08	4.8914e-06	1.02478	up	Laminin EGF domain	Laminin subunit beta-1 OS=Homo sapiens OX=9606 GN=LAMB1 PE=1 SV=2	--	laminin subunit beta-1-like [Perca flavescens]
Trans_newGene_8419	0.000344559	0.00756859	-1.10399	down	AIG1 family	GTPase IMAP family member 2 OS=Homo sapiens OX=9606 GN=GIMAP2 PE=1 SV=2	--	LOW QUALITY PROTEIN: GTPase IMAP family member 8-like [Seriola dumerili]
Trans_newGene_8606	1.66549e-06	9.91322e-05	-1.26202	down	Immunoglobulin C1-set domain;; CD80-like C2-set immunoglobulin domain	--	--	PREDICTED: tapasin-related protein-like, partial [Stegastes partitus]
Trans_newGene_8735	5.12733e-05	0.00164447	1.33123	up	Secreted Novel AID/APOBEC-like Deaminase 1;; Secreted Novel AID/APOBEC-like Deaminase 2	--	--	uncharacterized protein LOC114548619 [Perca flavescens]
Trans_newGene_8746	1.01899e-06	6.41964e-05	-1.19098	down
Trans_newGene_8870	1.88064e-14	4.86558e-12	2.54892	up	Carbohydrate esterase, sialic acid-specific acetylesterase	Sialate O-acetylesterase OS=Homo sapiens OX=9606 GN=SIAE PE=1 SV=1	--	putative sialate O-acetylesterase isoform 3 [Scophthalmus maximus]
Trans_newGene_894	8.96573e-07	5.76063e-05	-1.33229	down
Trans_newGene_897	2.06547e-06	0.000118425	-1.12783	down	SAM domain (Sterile alpha motif);; SAM domain (Sterile alpha motif)	Sterile alpha motif domain-containing protein 9-like OS=Homo sapiens OX=9606 GN=SAMD9L PE=1 SV=2	--	sterile alpha motif domain-containing protein 9-like [Perca flavescens]
Trans_newGene_9060	1.54523e-06	9.27844e-05	1.32181	up	Small cytokines (intecrine/chemokine), interleukin-8 like	--	--	C-C chemokine 1 [Epinephelus coioides]
Trans_newGene_9102	3.85699e-09	4.45482e-07	-1.95976	down
Trans_newGene_9114	5.81763e-06	0.000286511	-1.34854	down	--	--	--	interferon-induced protein with tetratricopeptide repeats 1-like [Perca flavescens]
Trans_newGene_9150	5.47071e-13	1.11741e-10	-1.63674	down	--	--	--	uncharacterized protein LOC113021306 isoform X2 [Astatotilapia calliptera]
Trans_newGene_921	5.76172e-17	2.10944e-14	1.58023	up
Trans_newGene_932	3.8562e-09	4.45482e-07	-1.27471	down	Saccharopine dehydrogenase NADP binding domain;; Shikimate / quinate 5-dehydrogenase	Alpha-aminoadipic semialdehyde synthase, mitochondrial OS=Mus musculus OX=10090 GN=Aass PE=1 SV=1	--	PREDICTED: alpha-aminoadipic semialdehyde synthase, mitochondrial-like, partial [Notothenia coriiceps]
Trans_newGene_9453	2.99089e-12	5.68974e-10	-2.28345	down
Trans_newGene_9496	3.26459e-31	5.27884e-28	2.44269	up
Trans_newGene_9497	2.98144e-07	2.19364e-05	1.42964	up	--	--	--	PREDICTED: uncharacterized protein LOC106533068 isoform X1 [Austrofundulus limnaeus]

## Sheet: Table S2
Table S2 GO enrichment analysis of DEGs between ZB vs ZR group
#GO_accession	Term_type	Description	P-value	Corrected_P-value	Rich_factor	DEGgeneIDs
GO:0006955	Biological Process	immune response	4.53e-08	8.12e-06	8.70346	Dxb_GLEAN_10006897;Dxb_GLEAN_10000996;Dxb_GLEAN_10007207;Dxb_GLEAN_10002190;Trans_newGene_9060;Dxb_GLEAN_10001519;Dxb_GLEAN_10005485;Dxb_GLEAN_10005220;Dxb_GLEAN_10018256;Dxb_GLEAN_10000506;Dxb_GLEAN_10002031
GO:0005125	Molecular Function	cytokine activity	1.02e-05	0.00116815	11.7322	Dxb_GLEAN_10002190;Dxb_GLEAN_10018256;Dxb_GLEAN_10006453;Dxb_GLEAN_10005220;Dxb_GLEAN_10006897;Dxb_GLEAN_10007207
GO:0017017	Molecular Function	MAP kinase tyrosine/serine/threonine phosphatase activity	4.72e-05	0.00271527	18.7715	Dxb_GLEAN_10014714;Dxb_GLEAN_10018070;Dxb_GLEAN_10019941;Dxb_GLEAN_10013271
GO:0000188	Biological Process	inactivation of MAPK activity	4.51e-05	0.00403355	18.9894	Dxb_GLEAN_10019941;Dxb_GLEAN_10013271;Dxb_GLEAN_10014714;Dxb_GLEAN_10018070
GO:0001660	Biological Process	fever generation	0.000195795	0.00876183	71.2101	Dxb_GLEAN_10018256;Dxb_GLEAN_10002190
GO:0051924	Biological Process	regulation of calcium ion transport	0.000195795	0.00876183	71.2101	Dxb_GLEAN_10002190;Dxb_GLEAN_10018256
GO:0006357	Biological Process	regulation of transcription by RNA polymerase II	0.000345903	0.0123833	4.5942	Dxb_GLEAN_10012237;Dxb_GLEAN_10009946;Dxb_GLEAN_10008591;Dxb_GLEAN_10001450;Dxb_GLEAN_10008935;Dxb_GLEAN_10018815;Dxb_GLEAN_10010620;Dxb_GLEAN_10008593
GO:0020037	Molecular Function	heme binding	0.000345362	0.0132389	5.29841	Dxb_GLEAN_10001324;Dxb_GLEAN_10009153;Dxb_GLEAN_10020578;Dxb_GLEAN_10001759;Dxb_GLEAN_10001241;Dxb_GLEAN_10000548;Dxb_GLEAN_10023126
GO:0005149	Molecular Function	interleukin-1 receptor binding	0.000595692	0.0159275	46.9287	Dxb_GLEAN_10002190;Dxb_GLEAN_10018256
GO:0043565	Molecular Function	sequence-specific DNA binding	0.000692499	0.0159275	2.58165	Dxb_GLEAN_10016694;Dxb_GLEAN_10012237;Dxb_GLEAN_10009946;Dxb_GLEAN_10016085;Dxb_GLEAN_10001450;Dxb_GLEAN_10021048;Dxb_GLEAN_10010620;Dxb_GLEAN_10016107;Dxb_GLEAN_10008935;Dxb_GLEAN_10021506;Dxb_GLEAN_10011976;Dxb_GLEAN_10017119;Dxb_GLEAN_10018815;Dxb_GLEAN_10006821;Dxb_GLEAN_10012441
GO:0005576	Cellular Component	extracellular region	0.00165788	0.0230119	2.68576	Dxb_GLEAN_10022359;Dxb_GLEAN_10001519;Dxb_GLEAN_10022324;Dxb_GLEAN_10006897;Dxb_GLEAN_10022599;Trans_newGene_9060;Dxb_GLEAN_10005220;Dxb_GLEAN_10007092;Dxb_GLEAN_10002031;Dxb_GLEAN_10021475;Dxb_GLEAN_10020530;Dxb_GLEAN_10005088
GO:0005833	Cellular Component	hemoglobin complex	0.00177015	0.0230119	29.5433	Dxb_GLEAN_10000548;Dxb_GLEAN_10001759
GO:0042612	Cellular Component	MHC class I protein complex	0.00308916	0.0267727	10.0716	Dxb_GLEAN_10000996;Dxb_GLEAN_10001519;Dxb_GLEAN_10000506
GO:0051781	Biological Process	positive regulation of cell division	0.0011532	0.029489	35.6051	Dxb_GLEAN_10018256;Dxb_GLEAN_10002190
GO:0009968	Biological Process	negative regulation of signal transduction	0.0011532	0.029489	35.6051	Dxb_GLEAN_10005882;Dxb_GLEAN_10009386
GO:0005667	Cellular Component	transcription factor complex	0.00561388	0.0364902	5.57421	Dxb_GLEAN_10007654;Dxb_GLEAN_10011934;Dxb_GLEAN_10021048;Dxb_GLEAN_10008593
GO:0005506	Molecular Function	iron ion binding	0.0026036	0.0440492	3.76146	Dxb_GLEAN_10000548;Dxb_GLEAN_10001759;Dxb_GLEAN_10001324;Dxb_GLEAN_10001241;Dxb_GLEAN_10023126;Dxb_GLEAN_10005589;Dxb_GLEAN_10009153
GO:0004879	Molecular Function	nuclear receptor activity	0.00268125	0.0440492	10.559	Dxb_GLEAN_10016107;Dxb_GLEAN_10017119;Dxb_GLEAN_10021506
GO:0008009	Molecular Function	chemokine activity	0.00309584	0.0445027	10.0562	Dxb_GLEAN_10002031;Dxb_GLEAN_10012205;Trans_newGene_9060
GO:0001228	Molecular Function	DNA-binding transcription activator activity, RNA polymerase II-specific	0.00401662	0.0513235	20.1123	Dxb_GLEAN_10007654;Dxb_GLEAN_10011934
GO:0003810	Molecular Function	protein-glutamine gamma-glutamyltransferase activity	0.00530574	0.0554691	17.5983	Dxb_GLEAN_10003608;Dxb_GLEAN_10021923
GO:0004180	Molecular Function	carboxypeptidase activity	0.00530574	0.0554691	17.5983	Trans_newGene_11945;Trans_newGene_12081
GO:0005540	Molecular Function	hyaluronic acid binding	0.00675836	0.0555151	15.6429	Dxb_GLEAN_10014329;Dxb_GLEAN_10022801
GO:0000982	Molecular Function	DNA-binding transcription factor activity, RNA polymerase II-specific	0.00675836	0.0555151	15.6429	Dxb_GLEAN_10008593;Dxb_GLEAN_10008591
GO:0008241	Molecular Function	peptidyl-dipeptidase activity	0.00675836	0.0555151	15.6429	Trans_newGene_12081;Trans_newGene_11945
GO:0007346	Biological Process	regulation of mitotic cell cycle	0.00283018	0.0562892	23.7367	Dxb_GLEAN_10012990;Dxb_GLEAN_10004098
GO:0001934	Biological Process	positive regulation of protein phosphorylation	0.00283018	0.0562892	23.7367	Dxb_GLEAN_10018256;Dxb_GLEAN_10002190
GO:0003700	Molecular Function	DNA-binding transcription factor activity	0.00782275	0.0566182	2.3253	Dxb_GLEAN_10016085;Dxb_GLEAN_10021048;Dxb_GLEAN_10001450;Dxb_GLEAN_10016341;Dxb_GLEAN_10012237;Dxb_GLEAN_10011065;Dxb_GLEAN_10012441;Dxb_GLEAN_10018815;Dxb_GLEAN_10008935;Dxb_GLEAN_10011976;Dxb_GLEAN_10010620
GO:0019825	Molecular Function	oxygen binding	0.00836965	0.0566182	14.0786	Dxb_GLEAN_10001759;Dxb_GLEAN_10000548
GO:0005344	Molecular Function	oxygen carrier activity	0.00836965	0.0566182	14.0786	Dxb_GLEAN_10001759;Dxb_GLEAN_10000548
GO:0002474	Biological Process	antigen processing and presentation of peptide antigen via MHC class I	0.00343183	0.0614298	9.71047	Dxb_GLEAN_10000996;Dxb_GLEAN_10000506;Dxb_GLEAN_10001519
GO:0005634	Cellular Component	nucleus	0.0139267	0.0724189	1.56612	Dxb_GLEAN_10007975;Dxb_GLEAN_10010815;Dxb_GLEAN_10016107;Dxb_GLEAN_10006821;Dxb_GLEAN_10012441;Dxb_GLEAN_10011065;Dxb_GLEAN_10021263;Dxb_GLEAN_10014794;Dxb_GLEAN_10012990;Dxb_GLEAN_10021506;Dxb_GLEAN_10007654;Dxb_GLEAN_10009946;Dxb_GLEAN_10008591;Dxb_GLEAN_10016694;Dxb_GLEAN_10016341;Dxb_GLEAN_10002524;Dxb_GLEAN_10008935;Dxb_GLEAN_10017119;Dxb_GLEAN_10012237;Dxb_GLEAN_10017706;Dxb_GLEAN_10015604;…
GO:0018149	Biological Process	peptide cross-linking	0.00518642	0.0843973	17.8025	Dxb_GLEAN_10003608;Dxb_GLEAN_10021923
GO:0004497	Molecular Function	monooxygenase activity	0.0142361	0.0909526	5.86609	Dxb_GLEAN_10009153;Dxb_GLEAN_10001241;Dxb_GLEAN_10001324
GO:0030522	Biological Process	intracellular receptor signaling pathway	0.00758088	0.112677	7.36657	Dxb_GLEAN_10021506;Dxb_GLEAN_10017119;Dxb_GLEAN_10016107
GO:0015671	Biological Process	oxygen transport	0.00818328	0.112677	14.242	Dxb_GLEAN_10001759;Dxb_GLEAN_10000548
GO:0016459	Cellular Component	myosin complex	0.0301051	0.130455	3.39579	Dxb_GLEAN_10004707;Trans_newGene_14005;Dxb_GLEAN_10002663;Dxb_GLEAN_10011697
GO:0000981	Molecular Function	DNA-binding transcription factor activity, RNA polymerase II-specific	0.0243299	0.139897	4.79953	Dxb_GLEAN_10006821;Dxb_GLEAN_10009946;Dxb_GLEAN_10016694
GO:0016705	Molecular Function	oxidoreductase activity, acting on paired donors, with incorporation or reduction of molecular oxygen	0.0243299	0.139897	4.79953	Dxb_GLEAN_10009153;Dxb_GLEAN_10001241;Dxb_GLEAN_10001324
GO:0046872	Molecular Function	metal ion binding	0.0278279	0.14819	1.68354	Dxb_GLEAN_10009904;Dxb_GLEAN_10006545;Dxb_GLEAN_10023095;Dxb_GLEAN_10012497;Dxb_GLEAN_10016859;Dxb_GLEAN_10018028;Dxb_GLEAN_10014794;Dxb_GLEAN_10017706;Dxb_GLEAN_10011839;Dxb_GLEAN_10014015;Trans_newGene_12081;Dxb_GLEAN_10005129;Trans_newGene_11945;Dxb_GLEAN_10003608;Dxb_GLEAN_10010815;Dxb_GLEAN_10003644
GO:0008083	Molecular Function	growth factor activity	0.0314517	0.14819	3.35205	Dxb_GLEAN_10006453;Dxb_GLEAN_10022599;Dxb_GLEAN_10003884;Dxb_GLEAN_10005088
GO:0003774	Molecular Function	motor activity	0.0314517	0.14819	3.35205	Trans_newGene_14005;Dxb_GLEAN_10002663;Dxb_GLEAN_10004707;Dxb_GLEAN_10011697
GO:0000978	Molecular Function	RNA polymerase II proximal promoter sequence-specific DNA binding	0.0322152	0.14819	7.03931	Dxb_GLEAN_10008591;Dxb_GLEAN_10008593
GO:0042605	Molecular Function	peptide antigen binding	0.0322152	0.14819	7.03931	Dxb_GLEAN_10000506;Dxb_GLEAN_10000996
GO:0004674	Molecular Function	protein serine/threonine kinase activity	0.0341531	0.151062	2.48446	Dxb_GLEAN_10012075;Dxb_GLEAN_10004098;Dxb_GLEAN_10015431;Dxb_GLEAN_10007172;Dxb_GLEAN_10004681;Dxb_GLEAN_10014083
GO:0005615	Cellular Component	extracellular space	0.0467429	0.173616	2.54684	Dxb_GLEAN_10012205;Dxb_GLEAN_10007207;Dxb_GLEAN_10016859;Dxb_GLEAN_10002190;Dxb_GLEAN_10018256
GO:0004725	Molecular Function	protein tyrosine phosphatase activity	0.0418073	0.178068	3.06057	Dxb_GLEAN_10019941;Dxb_GLEAN_10018070;Dxb_GLEAN_10014714;Dxb_GLEAN_10013271
GO:0005622	Cellular Component	intracellular	0.0561885	0.182613	1.55819	Dxb_GLEAN_10002404;Dxb_GLEAN_10008480;Dxb_GLEAN_10018250;Dxb_GLEAN_10000374;Dxb_GLEAN_10012778;Dxb_GLEAN_10000413;Dxb_GLEAN_10007714;Dxb_GLEAN_10007567;Dxb_GLEAN_10004010;Dxb_GLEAN_10000368;Dxb_GLEAN_10014392;Dxb_GLEAN_10012238;Dxb_GLEAN_10007821;Dxb_GLEAN_10010019;Dxb_GLEAN_10021701
GO:0005520	Molecular Function	insulin-like growth factor binding	0.0485859	0.199549	5.63145	Dxb_GLEAN_10021475;Dxb_GLEAN_10020530
GO:0003707	Molecular Function	steroid hormone receptor activity	0.057885	0.229544	3.40612	Dxb_GLEAN_10016107;Dxb_GLEAN_10021506;Dxb_GLEAN_10017119
GO:0004252	Molecular Function	serine-type endopeptidase activity	0.0658239	0.252325	2.63152	Dxb_GLEAN_10021072;Dxb_GLEAN_10016859;Dxb_GLEAN_10006031;Trans_newGene_6991
GO:0016491	Molecular Function	oxidoreductase activity	0.0698183	0.259004	2.27075	Trans_newGene_932;Dxb_GLEAN_10018388;Dxb_GLEAN_10014015;Dxb_GLEAN_10005589;Trans_newGene_2068
GO:0060070	Biological Process	canonical Wnt signaling pathway	0.0206547	0.264085	8.90127	Dxb_GLEAN_10021048;Dxb_GLEAN_10007975
GO:0045944	Biological Process	positive regulation of transcription by RNA polymerase II	0.0280346	0.30155	4.54533	Dxb_GLEAN_10007654;Dxb_GLEAN_10011934;Dxb_GLEAN_10007691
GO:0070098	Biological Process	chemokine-mediated signaling pathway	0.0286389	0.30155	7.4958	Dxb_GLEAN_10012205;Dxb_GLEAN_10002498
GO:0060326	Biological Process	cell chemotaxis	0.0286389	0.30155	7.4958	Dxb_GLEAN_10002031;Trans_newGene_9060
GO:0030218	Biological Process	erythrocyte differentiation	0.0315328	0.313577	7.12101	Dxb_GLEAN_10007543;Dxb_GLEAN_10012497
GO:0008237	Molecular Function	metallopeptidase activity	0.0967268	0.347612	3.80503	Trans_newGene_11945;Trans_newGene_12081
GO:0035335	Biological Process	peptidyl-tyrosine dephosphorylation	0.038975	0.367186	3.13012	Dxb_GLEAN_10018070;Dxb_GLEAN_10019941;Dxb_GLEAN_10013271;Dxb_GLEAN_10014714
GO:0008146	Molecular Function	sulfotransferase activity	0.105699	0.368346	3.6099	Dxb_GLEAN_10018252;Dxb_GLEAN_10009262
GO:0005102	Molecular Function	signaling receptor binding	0.119555	0.404376	3.35205	Dxb_GLEAN_10022359;Dxb_GLEAN_10020825
GO:0008289	Molecular Function	lipid binding	0.124269	0.408314	3.2741	Dxb_GLEAN_10007025;Dxb_GLEAN_10001239
GO:0008285	Biological Process	negative regulation of cell population proliferation	0.0475827	0.425865	5.69681	Dxb_GLEAN_10011065;Dxb_GLEAN_10007975
GO:0006633	Biological Process	fatty acid biosynthetic process	0.0510844	0.435434	5.4777	Dxb_GLEAN_10005589;Dxb_GLEAN_10009389
GO:0043401	Biological Process	steroid hormone mediated signaling pathway	0.0607709	0.463269	3.33798	Dxb_GLEAN_10017119;Dxb_GLEAN_10016107;Dxb_GLEAN_10021506
GO:0006954	Biological Process	inflammatory response	0.0621143	0.463269	4.91104	Dxb_GLEAN_10012205;Dxb_GLEAN_10020578
GO:0000122	Biological Process	negative regulation of transcription by RNA polymerase II	0.0621143	0.463269	4.91104	Dxb_GLEAN_10006821;Dxb_GLEAN_10016694
GO:0001558	Biological Process	regulation of cell growth	0.0738668	0.523993	4.45063	Dxb_GLEAN_10020530;Dxb_GLEAN_10021475
GO:0055114	Biological Process	oxidation-reduction process	0.0761107	0.523993	1.55064	Dxb_GLEAN_10001241;Dxb_GLEAN_10020133;Dxb_GLEAN_10019198;Trans_newGene_2068;Dxb_GLEAN_10020578;Trans_newGene_932;Dxb_GLEAN_10005589;Dxb_GLEAN_10014015;Dxb_GLEAN_10018388;Dxb_GLEAN_10009389;Dxb_GLEAN_10001324;Dxb_GLEAN_10023126;Dxb_GLEAN_10009153
GO:0008270	Molecular Function	zinc ion binding	0.177507	0.567036	1.30037	Dxb_GLEAN_10017119;Dxb_GLEAN_10016107;Dxb_GLEAN_10014525;Dxb_GLEAN_10012589;Dxb_GLEAN_10002404;Dxb_GLEAN_10007691;Dxb_GLEAN_10021506;Dxb_GLEAN_10000374;Dxb_GLEAN_10018250;Dxb_GLEAN_10011934;Dxb_GLEAN_10007714;Dxb_GLEAN_10000413;Dxb_GLEAN_10000368;Dxb_GLEAN_10012778;Dxb_GLEAN_10005865
GO:0006396	Biological Process	RNA processing	0.0948504	0.606365	3.8492	Trans_newGene_4527;Dxb_GLEAN_10009389
GO:0006915	Biological Process	apoptotic process	0.0948504	0.606365	3.8492	Dxb_GLEAN_10011065;Dxb_GLEAN_10021701
GO:0043066	Biological Process	negative regulation of apoptotic process	0.0992325	0.612504	3.7479	Dxb_GLEAN_10004098;Dxb_GLEAN_10007821
Dxb_GLEAN_10005796;Dxb_GLEAN_10003056;Dxb_GLEAN_10009360;Dxb_GLEAN_10017463;Dxb_GLEAN_10010793;Dxb_GLEAN_10011594;Dxb_GLEAN_10022252;Dxb_GLEAN_10019714;Dxb_GLEAN_10004510;Trans_newGene_9567;Dxb_GLEAN_10013603;Dxb_GLEAN_10020482;Dxb_GLEAN_10004341;Dxb_GLEAN_10006327;Dxb_GLEAN_10012421;Dxb_GLEAN_10020759;Trans_newGene_13571;Dxb_GLEAN_10014999;Dxb_GLEAN_10017460;Dxb_GLEAN_10001495;Dxb_GLEAN_10009367…
_10004789;Dxb_GLEAN_10010356;Dxb_GLEAN_10006535;Dxb_GLEAN_10015106;Dxb_GLEAN_10014109;Dxb_GLEAN_10013341;Dxb_GLEAN_10004477;Trans_newGene_2083;Dxb_GLEAN_10001457;Dxb_GLEAN_10008468;Dxb_GLEAN_10021752;Dxb_GLEAN_10005266;Dxb_GLEAN_10003821;Dxb_GLEAN_10022210;Dxb_GLEAN_10005150;Dxb_GLEAN_10021658;Trans_newGene_3759;Dxb_GLEAN_10016963;Dxb_GLEAN_10013358;Dxb_GLEAN_10007778;Dxb_GLEAN_10000543;Dxb_GLEAN…	-;-;-;-;-;Trans_newGene_7728;-;-;Trans_newGene_5086;-;-;-;-;-;-;-;Trans_newGene_2165;-;-;Trans_newGene_8999;-;-;-;-;-;-;-;Trans_newGene_6928;-;-;Trans_newGene_14441;-;-;-;-;-;Trans_newGene_8469;-;Trans_newGene_4066;-;-;-;-;-;Trans_newGene_2131;-;-;-;-;-;-;-;Trans_newGene_13562;Trans_newGene_8836;-;-;-;-;-;Trans_newGene_8034;Trans_newGene_5045;Trans_newGene_6648;-;-;-;-;-;-;-;-;-;-;Trans_newGene_9…
GO:0043005	Cellular Component	neuron projection	1	1	4.34461	Dxb_GLEAN_10011075
GO:0033768	Cellular Component	SUMO-targeted ubiquitin ligase complex	1	1	73.8583	Dxb_GLEAN_10007691
GO:0033162	Cellular Component	melanosome membrane	1	1	36.9292	Dxb_GLEAN_10020133
GO:0005579	Cellular Component	membrane attack complex	1	1	10.5512	Dxb_GLEAN_10005485
GO:0031090	Cellular Component	organelle membrane	1	1	12.3097	Dxb_GLEAN_10023126
GO:0005923	Cellular Component	bicellular tight junction	1	1	1.39355	Dxb_GLEAN_10011185
GO:0005882	Cellular Component	intermediate filament	1	1	2.38253	Trans_newGene_3279
GO:0042470	Cellular Component	melanosome	1	1	18.4646	Dxb_GLEAN_10005194
GO:0005581	Cellular Component	collagen trimer	1	1	1.80142	Dxb_GLEAN_10022324
GO:0030672	Cellular Component	synaptic vesicle membrane	1	1	10.5512	Dxb_GLEAN_10012994
GO:0031234	Cellular Component	extrinsic component of cytoplasmic side of plasma membrane	1	1	5.68141	Dxb_GLEAN_10020825
GO:0004842	Molecular Function	ubiquitin-protein transferase activity	0.392059	1	1.48196	Dxb_GLEAN_10003644;Dxb_GLEAN_10014525
GO:0003779	Molecular Function	actin binding	0.41314	1	1.28768	Dxb_GLEAN_10002663;Dxb_GLEAN_10004707;Dxb_GLEAN_10011697
GO:0005198	Molecular Function	structural molecule activity	0.511055	1	1.17322	Trans_newGene_3279;Dxb_GLEAN_10011185
GO:0046983	Molecular Function	protein dimerization activity	0.558437	1	1.0747	Dxb_GLEAN_10015604;Dxb_GLEAN_10016341
GO:0003677	Molecular Function	DNA binding	0.724226	1	0.841352	Dxb_GLEAN_10016341;Dxb_GLEAN_10017706;Dxb_GLEAN_10014794;Dxb_GLEAN_10010815;Dxb_GLEAN_10012497;Dxb_GLEAN_10015604
GO:0005525	Molecular Function	GTP binding	0.765321	1	0.773551	Dxb_GLEAN_10008480;Dxb_GLEAN_10014392;Dxb_GLEAN_10007567;Dxb_GLEAN_10012238
GO:0005524	Molecular Function	ATP binding	0.789298	1	0.84811	Dxb_GLEAN_10012075;Dxb_GLEAN_10015431;Dxb_GLEAN_10007172;Dxb_GLEAN_10004010;Dxb_GLEAN_10009904;Dxb_GLEAN_10004707;Dxb_GLEAN_10022275;Dxb_GLEAN_10002663;Dxb_GLEAN_10014083;Dxb_GLEAN_10005812;Dxb_GLEAN_10004098;Dxb_GLEAN_10011697;Dxb_GLEAN_10013907;Dxb_GLEAN_10020825;Dxb_GLEAN_10004681
GO:0003676	Molecular Function	nucleic acid binding	0.815614	1	0.73633	Dxb_GLEAN_10005129;Dxb_GLEAN_10011839;Dxb_GLEAN_10006545;Dxb_GLEAN_10018028;Dxb_GLEAN_10023095
GO:0005509	Molecular Function	calcium ion binding	0.992235	1	0.296392	Dxb_GLEAN_10002665;Dxb_GLEAN_10012994
GO:0008832	Molecular Function	dGTPase activity	1	1	70.3931	Dxb_GLEAN_10002524
GO:0038036	Molecular Function	sphingosine-1-phosphate receptor activity	1	1	14.0786	Dxb_GLEAN_10020088
GO:0003876	Molecular Function	AMP deaminase activity	1	1	23.4644	Dxb_GLEAN_10013067
GO:0032184	Molecular Function	SUMO polymer binding	1	1	70.3931	Dxb_GLEAN_10007691
GO:0004707	Molecular Function	MAP kinase activity	1	1	4.14077	Dxb_GLEAN_10004010
GO:0004675	Molecular Function	transmembrane receptor protein serine/threonine kinase activity	1	1	3.91073	Dxb_GLEAN_10013907
GO:0015297	Molecular Function	antiporter activity	1	1	10.0562	Dxb_GLEAN_10015567
GO:0005544	Molecular Function	calcium-dependent phospholipid binding	1	1	3.19969	Dxb_GLEAN_10012994
GO:0004697	Molecular Function	protein kinase C activity	1	1	3.19969	Dxb_GLEAN_10009904
GO:0005104	Molecular Function	fibroblast growth factor receptor binding	1	1	5.41485	Dxb_GLEAN_10022599
GO:0005332	Molecular Function	gamma-aminobutyric acid:sodium symporter activity	1	1	7.82146	Dxb_GLEAN_10011075
GO:0050501	Molecular Function	hyaluronan synthase activity	1	1	35.1966	Dxb_GLEAN_10016628
GO:0005452	Molecular Function	inorganic anion exchanger activity	1	1	7.03931	Dxb_GLEAN_10007543
GO:0061630	Molecular Function	ubiquitin protein ligase activity	1	1	1.75983	Dxb_GLEAN_10007691
GO:0004950	Molecular Function	chemokine receptor activity	1	1	5.86609	Dxb_GLEAN_10002498
GO:0008236	Molecular Function	serine-type peptidase activity	1	1	3.19969	Dxb_GLEAN_10018772
GO:0015067	Molecular Function	amidinotransferase activity	1	1	23.4644	Dxb_GLEAN_10022627
GO:0000975	Molecular Function	transcription regulatory region DNA binding	1	1	5.02808	Dxb_GLEAN_10011065
GO:0008081	Molecular Function	phosphoric diester hydrolase activity	1	1	6.39937	Dxb_GLEAN_10018003
GO:0004731	Molecular Function	purine-nucleoside phosphorylase activity	1	1	11.7322	Dxb_GLEAN_10022273
GO:0036459	Molecular Function	thiol-dependent ubiquitinyl hydrolase activity	1	1	3.19969	Dxb_GLEAN_10010964
GO:0004176	Molecular Function	ATP-dependent peptidase activity	1	1	10.0562	Dxb_GLEAN_10014525
GO:0070330	Molecular Function	aromatase activity	1	1	11.7322	Dxb_GLEAN_10023126
GO:0016716	Molecular Function	oxidoreductase activity, acting on paired donors, with incorporation or reduction of molecular oxygen, another compound as one donor, and incorporation of one atom of oxygen	1	1	35.1966	Dxb_GLEAN_10020133
GO:0030276	Molecular Function	clathrin binding	1	1	11.7322	Dxb_GLEAN_10012994
GO:0001085	Molecular Function	RNA polymerase II transcription factor binding	1	1	35.1966	Dxb_GLEAN_10011934
GO:0030246	Molecular Function	carbohydrate binding	1	1	1.11735	Dxb_GLEAN_10002278
GO:0004222	Molecular Function	metalloendopeptidase activity	1	1	0.711041	Dxb_GLEAN_10005865
GO:0004666	Molecular Function	prostaglandin-endoperoxide synthase activity	1	1	17.5983	Dxb_GLEAN_10020578
GO:0003714	Molecular Function	transcription corepressor activity	1	1	5.41485	Dxb_GLEAN_10022275
GO:0015179	Molecular Function	L-amino acid transmembrane transporter activity	1	1	35.1966	Dxb_GLEAN_10015567
GO:0005138	Molecular Function	interleukin-6 receptor binding	1	1	70.3931	Dxb_GLEAN_10006897
GO:0019905	Molecular Function	syntaxin binding	1	1	5.86609	Dxb_GLEAN_10012994
GO:0004715	Molecular Function	non-membrane spanning protein tyrosine kinase activity	1	1	2.07039	Dxb_GLEAN_10020825
GO:0052689	Molecular Function	carboxylic ester hydrolase activity	1	1	5.02808	Dxb_GLEAN_10010149
GO:0004861	Molecular Function	cyclin-dependent protein serine/threonine kinase inhibitor activity	1	1	23.4644	Dxb_GLEAN_10012990
GO:0030414	Molecular Function	peptidase inhibitor activity	1	1	5.86609	Trans_newGene_779
GO:0004349	Molecular Function	glutamate 5-kinase activity	1	1	23.4644	Dxb_GLEAN_10019198
GO:0004467	Molecular Function	long-chain fatty acid-CoA ligase activity	1	1	14.0786	Dxb_GLEAN_10019924
GO:0022891	Molecular Function	transmembrane transporter activity	1	1	4.39957	Dxb_GLEAN_10017823
GO:0046982	Molecular Function	protein heterodimerization activity	1	1	0.748863	Dxb_GLEAN_10007654
GO:0008781	Molecular Function	N-acylneuraminate cytidylyltransferase activity	1	1	35.1966	Dxb_GLEAN_10002747
GO:0017153	Molecular Function	sodium:dicarboxylate symporter activity	1	1	5.41485	Dxb_GLEAN_10013307
GO:0016301	Molecular Function	kinase activity	1	1	0.670411	Dxb_GLEAN_10014714
GO:0004601	Molecular Function	peroxidase activity	1	1	5.86609	Dxb_GLEAN_10020578
GO:0004768	Molecular Function	stearoyl-CoA 9-desaturase activity	1	1	35.1966	Dxb_GLEAN_10009389
GO:0008134	Molecular Function	transcription factor binding	1	1	4.14077	Dxb_GLEAN_10007691
GO:0004089	Molecular Function	carbonate dehydratase activity	1	1	14.0786	Dxb_GLEAN_10012589
GO:0004672	Molecular Function	protein kinase activity	1	1	0.596552	Dxb_GLEAN_10022275
GO:0004994	Molecular Function	somatostatin receptor activity	1	1	10.0562	Dxb_GLEAN_10007967
GO:0003682	Molecular Function	chromatin binding	1	1	1.75983	Dxb_GLEAN_10011934
GO:0005328	Molecular Function	neurotransmitter:sodium symporter activity	1	1	1.95536	Dxb_GLEAN_10011075
GO:0000976	Molecular Function	transcription regulatory region sequence-specific DNA binding	1	1	5.86609	Dxb_GLEAN_10007654
GO:0016787	Molecular Function	hydrolase activity	1	1	0.545683	Dxb_GLEAN_10009046
GO:0003824	Molecular Function	catalytic activity	1	1	0.525322	Dxb_GLEAN_10010624
GO:0004702	Molecular Function	obsolete signal transducer, downstream of receptor, with serine/threonine kinase activity	1	1	1.95536	Dxb_GLEAN_10013907
GO:0008173	Molecular Function	RNA methyltransferase activity	1	1	23.4644	Dxb_GLEAN_10009389
GO:0008013	Molecular Function	beta-catenin binding	1	1	5.02808	Dxb_GLEAN_10021048
GO:0005507	Molecular Function	copper ion binding	1	1	3.35205	Dxb_GLEAN_10020133
GO:0004977	Molecular Function	melanocortin receptor activity	1	1	35.1966	Dxb_GLEAN_10016361
GO:0015245	Molecular Function	fatty acid transmembrane transporter activity	1	1	23.4644	Dxb_GLEAN_10019924
GO:0004867	Molecular Function	serine-type endopeptidase inhibitor activity	1	1	2.70743	Dxb_GLEAN_10006871
GO:0048020	Molecular Function	CCR chemokine receptor binding	1	1	70.3931	Dxb_GLEAN_10012205
GO:0005164	Molecular Function	tumor necrosis factor receptor binding	1	1	7.03931	Dxb_GLEAN_10007207
GO:0015175	Molecular Function	neutral amino acid transmembrane transporter activity	1	1	35.1966	Dxb_GLEAN_10015567
GO:0004871	Molecular Function	obsolete signal transducer activity	1	1	0.790934	Dxb_GLEAN_10016308
GO:0031957	Molecular Function	very long-chain fatty acid-CoA ligase activity	1	1	14.0786	Dxb_GLEAN_10019924
GO:0004350	Molecular Function	glutamate-5-semialdehyde dehydrogenase activity	1	1	23.4644	Dxb_GLEAN_10019198
GO:0000977	Molecular Function	RNA polymerase II regulatory region sequence-specific DNA binding	1	1	8.79914	Dxb_GLEAN_10011934

## Sheet: Table S3
Table S3 Pathway analysis of transcriptome
#Kegg_pathway	ko_id	Enrichment_Factor	P-value	Corrected_P-value
Pertussis	ko05133	5.31131	5.6015e-08	1.14831e-05
Osteoclast differentiation	ko04380	4.39205	7.5022e-07	7.68975e-05
Prion diseases	ko05020	8.651	3.64603e-06	0.000249145
NOD-like receptor signaling pathway	ko04621	4.65462	1.06418e-05	0.000545392
TNF signaling pathway	ko04668	4.01654	2.21331e-05	0.000907455
Influenza A	ko05164	2.82821	0.00011045	0.00377371
Chagas disease (American trypanosomiasis)	ko05142	3.42829	0.000381767	0.0111803
MAPK signaling pathway	ko04010	2.36511	0.000875544	0.0201877
Malaria	ko05144	5.35281	0.000886288	0.0201877
Graft-versus-host disease	ko05332	5.15933	0.00107547	0.0220472
Salmonella infection	ko05132	3.54323	0.00369181	0.0688019
Hematopoietic cell lineage	ko04640	3.10308	0.00439015	0.0730962
Toll-like receptor signaling pathway	ko04620	3.06971	0.00468362	0.0730962
Rheumatoid arthritis	ko05323	3.03705	0.00499194	0.0730962
Herpes simplex virus 1 infection	ko05168	2.25597	0.00994615	0.135931
Cytokine-cytokine receptor interaction	ko04060	2.25144	0.0138891	0.157964
Cell adhesion molecules (CAMs)	ko04514	2.04892	0.0147143	0.157964
Type I diabetes mellitus	ko04940	3.4646	0.0148344	0.157964
Antigen processing and presentation	ko04612	3.01567	0.0148657	0.157964
Leishmaniasis	ko05140	2.70052	0.0154111	0.157964
AGE-RAGE signaling pathway in diabetic complications	ko04933	2.37903	0.0198338	0.187897
Human T-cell leukemia virus 1 infection	ko05166	1.89738	0.0201645	0.187897
Inflammatory bowel disease (IBD)	ko05321	3.10308	0.0227774	0.203016
PI3K-Akt signaling pathway	ko04151	1.65979	0.0276194	0.235916
Hepatitis C	ko05160	2.09145	0.0384832	0.308836
ECM-receptor interaction	ko04512	2.22042	0.0391694	0.308836
Tuberculosis	ko05152	1.81731	0.0408033	0.309802
Complement and coagulation cascades	ko04610	2.37903	0.0598467	0.438163
Tyrosine metabolism	ko00350	3.24413	0.0652229	0.461059
African trypanosomiasis	ko05143	2.57192	0.070574	0.470783
Small cell lung cancer	ko05222	2.06872	0.0711916	0.470783
Renin-angiotensin system	ko04614	4.07833	0.0859963	0.548166
Amoebiasis	ko05146	1.83675	0.0882413	0.548166
Legionellosis	ko05134	2.321	0.0943893	0.563315
Non-alcoholic fatty liver disease (NAFLD)	ko04932	1.79066	0.0976378	0.563315
Collecting duct acid secretion	ko04966	3.75636	0.0989236	0.563315
Glycine, serine and threonine metabolism	ko00260	2.64336	0.104861	0.57247
Hepatitis B	ko05161	1.75297	0.106116	0.57247
FoxO signaling pathway	ko04068	1.71682	0.114981	0.604386
JAK-STAT signaling pathway	ko04630	1.78427	0.121391	0.622128
Insulin resistance	ko04931	1.74786	0.130225	0.651125
Cytosolic DNA-sensing pathway	ko04623	2.35288	0.1354	0.660882
Cocaine addiction	ko05030	2.25381	0.148386	0.707423
Amino sugar and nucleotide sugar metabolism	ko00520	2.18482	0.158381	0.73791
ErbB signaling pathway	ko04012	1.70744	0.170114	0.758752
Arginine and proline metabolism	ko00330	2.09914	0.172017	0.758752
Amphetamine addiction	ko05031	1.83002	0.175716	0.758752
Prolactin signaling pathway	ko04917	1.81836	0.178483	0.758752
Apoptosis	ko04210	1.51393	0.18136	0.758752
Porphyrin and chlorophyll metabolism	ko00860	2.50424	0.190026	0.776032
Amyotrophic lateral sclerosis (ALS)	ko05014	1.98252	0.193062	0.776032
Viral myocarditis	ko05416	1.61472	0.198685	0.777743
Systemic lupus erythematosus	ko05322	1.60024	0.203602	0.777743
Toxoplasmosis	ko05145	1.51316	0.206466	0.777743
Signaling pathways regulating pluripotency of stem cells	ko04550	1.50783	0.208663	0.777743
NF-kappa B signaling pathway	ko04064	1.56515	0.21607	0.790972
Hypertrophic cardiomyopathy (HCM)	ko05410	1.55154	0.221125	0.793766
TGF-beta signaling pathway	ko04350	1.65019	0.224578	0.793766
Chemical carcinogenesis	ko05204	2.09914	0.246682	0.857116
RNA degradation	ko03018	1.64702	0.274521	0.937947
Nicotinate and nicotinamide metabolism	ko00760	1.90322	0.283106	0.951421
PPAR signaling pathway	ko03320	1.59785	0.289776	0.958131
Allograft rejection	ko05330	1.55154	0.305094	0.969948
Fanconi anemia pathway	ko03460	1.78427	0.309049	0.969948
Epithelial cell signaling in Helicobacter pylori infection	ko05120	1.52937	0.312767	0.969948
Ovarian steroidogenesis	ko04913	1.74075	0.319379	0.969948
Bladder cancer	ko05219	1.74075	0.319379	0.969948
Retinol metabolism	ko00830	1.6993	0.329673	0.969948
Focal adhesion	ko04510	1.19839	0.337398	0.969948
Aldosterone synthesis and secretion	ko04925	1.35944	0.339626	0.969948
Cell cycle	ko04110	1.353	0.342812	0.969948
Colorectal cancer	ko05210	1.44671	0.343486	0.969948
Tight junction	ko04530	1.2245	0.347161	0.969948
Tryptophan metabolism	ko00380	1.62206	0.350128	0.969948
Melanogenesis	ko04916	1.32783	0.355562	0.97187
Staphylococcus aureus infection	ko05150	1.39943	0.362644	0.973189
Bile secretion	ko04976	1.39034	0.366467	0.973189
Thyroid hormone synthesis	ko04918	1.38137	0.370286	0.973189
T cell receptor signaling pathway	ko04660	1.27448	0.384235	0.984913
MicroRNAs in cancer	ko05206	1.19951	0.384356	0.984913
Endocrine resistance	ko01522	1.25764	0.393767	0.996572

## Sheet: Table S4
Table S4 SDMs of POS in ZB vs ZR group
Index	Mass	RT	VIP	p-value	Fold.Change	Log2FC	Type
P0040	145.158	0.958	1.6741	0.00802225	2.35578	1.23621	up
P0043	431.341	10.116	1.48842	0.0273254	2.26097	1.17694	up
P0059	268.081	2.23	1.55727	0.0257596	0.491791	-1.02388	down
P0071	510.357	10.497	1.60185	0.015238	2.11119	1.07806	up
P0083	220.085	5.614	2.26741	1.40689e-05	0.234394	-2.09299	down
P0086	228.137	5.385	1.56733	0.0254379	0.492948	-1.02049	down
P0093	181.073	2.068	1.49356	0.0399301	632.295	9.30445	up
P0094	162.004	2.004	1.49742	0.0390557	646.662	9.33687	up
P0105	202.216	1.011	1.58869	0.0149781	2.42696	1.27915	up
P0127	222.163	1.43	1.55904	0.0240039	0.293661	-1.76778	down
P0131	160.075	3.461	1.91667	0.00171525	0.22217	-2.17027	down
P0139	326.152	11.226	1.76771	0.00976905	3.50069	1.80764	up
P0149	228.136	5.331	2.00034	0.00154881	0.376479	-1.40936	down
P0151	200.045	1.758	1.77569	0.0070758	6.40308	2.67876	up
P0182	258.111	1.232	1.68253	0.00803719	2.60388	1.38066	up
P0195	210.137	5.438	2.20627	7.33638e-06	0.191806	-2.38228	down
P0197	123.08	11.254	1.76293	0.00465793	0.411649	-1.28051	down
P0198	467.301	9.448	1.68527	0.0123628	2.27999	1.18903	up
P0204	326.152	11.486	1.93053	0.00261078	3.97868	1.99229	up
P0212	200.048	1.43	1.74514	0.00854588	5.65834	2.50038	up
P0230	85.0529	2.347	1.95351	0.00149138	0.372799	-1.42353	down
P0233	284.137	3.682	1.50275	0.0433884	0.431329	-1.21314	down
P0237	143.073	5.586	2.11701	8.09057e-05	0.290497	-1.7834	down
P0243	128.131	1.01	1.63212	0.0102974	2.39438	1.25965	up
P0248	340.116	6.441	2.02165	0.000552033	4.3417	2.11826	up
P0260	172.1	5.6	2.08941	0.000128005	0.303036	-1.72244	down
P0281	126.008	1.759	1.79932	0.00614605	5.68471	2.50709	up
P0301	202.216	1.151	1.67104	0.0101853	2.81923	1.4953	up
P0344	168.069	5.552	2.15213	2.51794e-05	0.169003	-2.56488	down
P0356	235.121	1.655	1.86907	0.00185951	3.07807	1.62202	up
P0359	94.0783	0.993	1.71686	0.00600279	2.49913	1.32143	up
P0363	356.197	10.383	1.57019	0.0314223	2.48348	1.31236	up
P0365	137.095	1.153	2.1311	0.000158792	0.257396	-1.95794	down
P0371	228.136	5.325	1.99616	0.00163195	0.374178	-1.41821	down
P0372	170.105	2.402	1.51962	0.014987	0.000423669	-11.2048	down
P0377	334.215	9.384	1.64773	0.0137738	2.48379	1.31254	up
P0396	150.116	4.892	2.00729	0.00144683	0.369988	-1.43445	down
P0419	230.212	7.549	1.5043	0.0206491	2.57377	1.36388	up
P0420	156.069	5.003	1.30609	0.000722842	0.189084	-2.4029	down
P0421	200.045	1.572	1.71758	0.00994151	4.33708	2.11672	up
P0432	186.116	5.711	2.19366	1.93595e-05	0.270303	-1.88735	down
P0435	202.216	0.963	1.66146	0.00988512	4.25971	2.09076	up
P0436	878.049	5.934	1.69166	0.00801272	0.392694	-1.34852	down
P0443	175.111	4.93	2.24994	6.98798e-06	0.233445	-2.09884	down
P0448	877.972	5.938	1.39775	0.0343275	0.445683	-1.16591	down
P0464	444.287	8.578	1.80451	0.00641203	4767.72	12.2191	up
P0475	260.137	2.309	1.61831	0.0112733	2.20374	1.13996	up
P0477	209.153	5.812	2.19644	1.08211e-05	0.187948	-2.4116	down
P0489	224.153	5.868	2.19683	1.17962e-05	0.166926	-2.58272	down
P0506	164.131	5.25	1.89799	0.00316128	0.385145	-1.37653	down
P0508	878.215	5.937	1.77323	0.00449721	0.360468	-1.47206	down
P0510	258.111	1.243	1.68453	0.00792154	2.60675	1.38225	up
P0513	378.241	8.293	1.79462	0.00722088	4.09044	2.03226	up
P0517	110.009	1.935	1.54282	0.032762	0.000926062	-10.0766	down
P0535	253.08	4.839	1.56572	0.0217232	2.08094	1.05723	up
P0556	268.167	6.264	1.65343	0.00589015	0.476702	-1.06884	down
P0577	199.169	5.979	2.05841	0.000186035	0.210636	-2.24717	down
P0583	878.287	5.934	1.79374	0.00382126	0.361206	-1.46911	down
P0587	477.322	10.433	1.64498	0.0103788	2.68354	1.42414	up
P0588	184.066	4.66	1.88906	0.00300045	0.230964	-2.11426	down
P0589	414.214	5.088	1.05287	0.0132475	0.295865	-1.75699	down
P0596	202.075	5.614	1.16596	7.92299e-05	0.28342	-1.81899	down
P0660	366.241	8.811	1.48764	0.0402164	2.82849	1.50003	up
P0667	157.121	3.566	2.27794	1.70263e-06	0.116192	-3.10542	down
P0674	78.0155	1.441	1.59082	0.0195525	0.000936762	-10.06	down
P0678	877.896	5.941	1.74449	0.00570687	0.389283	-1.36111	down
P0715	448.296	10.126	1.55147	0.0219218	2.294	1.19786	up
P0717	152.094	3.771	2.38339	1.86952e-15	2.725e-06	-18.4853	down
P0723	878.367	5.936	1.74509	0.00538615	0.38281	-1.3853	down
P0725	614.182	8.574	1.79875	0.00770668	5.14188	2.3623	up
P0727	951.054	5.94	1.69731	0.00749401	0.412522	-1.27746	down
P0730	877.82	5.994	1.73892	0.00585314	0.378286	-1.40245	down
P0738	140.062	5.73	1.28403	9.54688e-05	0.313022	-1.67567	down
P0754	203.105	5.264	1.9001	0.0213582	0.000617746	-10.6607	down
P0767	168.069	5.613	2.29682	3.08684e-06	0.214558	-2.22056	down
P0768	170.08	5.348	2.16402	4.78261e-05	0.218262	-2.19587	down
P0773	248.153	6.477	2.17113	0.000101603	0.304429	-1.71582	down
P0782	402.194	8.486	1.33185	0.0489529	2.06134	1.04358	up
P0798	222.101	5.332	1.79293	0.00235977	2.632	1.39616	up
P0802	152.094	2.728	2.07106	0.000216684	2.22036e-05	-15.4588	down
P0809	308.174	4.904	1.80002	0.00364151	2.05586	1.03974	up
P0815	352.226	7.669	1.76896	0.00778737	4.11466	2.04077	up
P0825	87.0683	5.181	1.92795	0.00129221	0.482498	-1.0514	down
P0827	815.473	5.936	1.76857	0.00458513	0.366049	-1.44989	down
P0829	878.431	5.937	1.70179	0.00701028	0.416389	-1.264	down
P0830	157.121	3.393	2.06292	0.000246642	2.28265e-05	-15.4189	down
P0833	660.167	8.624	1.65763	0.0168796	3.69814	1.8868	up
P0839	204.09	4.512	1.84649	0.00383895	0.000119117	-13.0353	down
P0850	189.09	4.936	1.62011	0.00167144	0.125119	-2.99863	down
P0876	229.179	5.776	2.18757	1.54226e-05	0.175138	-2.51344	down
P0886	333.168	5.402	1.52389	0.031148	2.73128	1.44958	up
P0889	336.23	10.301	1.60614	0.0189571	2.36949	1.24458	up
P0895	332.2	6.65	1.8959	0.00170002	0.406968	-1.29701	down
P0898	222.199	8.022	1.51579	0.0355293	419.218	8.71156	up
P0902	170.105	2.111	1.96391	0.00010058	0.0555761	-4.16939	down
P0915	202.111	5.348	2.11083	0.000104158	0.222534	-2.1679	down
P0937	176.07	2.843	2.1197	6.04789e-05	0.480671	-1.05688	down
P0949	209.153	5.838	2.13694	5.52339e-05	0.243392	-2.03865	down
P0968	158.094	1.299	1.41068	0.0405162	2.08009	1.05664	up
P0979	951.563	5.935	1.73123	0.00589123	0.376625	-1.4088	down
P0980	241.009	4.838	1.4619	0.0349343	2.09893	1.06966	up
P0986	155.131	2.213	2.05257	0.000476123	0.112413	-3.15312	down
P0989	249.03	1.57	1.59836	0.015033	3.8016	1.92661	up
P1001	327.314	10.467	1.46569	0.0303306	4.40437	2.13893	up
P1008	211.14	5.438	1.60731	3.79987e-05	0.191892	-2.38164	down
P1027	894.402	8.613	1.78622	0.00799806	4.95652	2.30933	up
P1028	228.148	4.78	1.8515	0.00253412	2.2857	1.19264	up
P1033	153.09	2.872	1.84796	0.0047566	0.00015191	-12.6845	down
P1045	175.086	2.978	1.29221	3.48004e-05	0.176314	-2.50378	down
P1054	225.09	5.017	2.17461	3.70688e-05	0.33214	-1.59014	down
P1068	509.349	10.471	1.60482	0.0149835	2.17893	1.12362	up
P1069	184.064	5.737	2.12565	0.00021403	0.305025	-1.713	down
P1083	169.089	5.697	2.38197	0	0.0625	-4	down
P1091	374.128	5.026	1.83948	0.00370205	3.55211	1.82867	up
P1102	176.07	3.187	1.41273	0.0358184	0.00135581	-9.52663	down
P1109	277.203	5.832	2.10314	0.000293143	0.417347	-1.26068	down
P1113	410.267	7.345	1.86189	0.00167455	0.299441	-1.73966	down
P1120	815.332	5.934	1.19827	0.0142674	0.000167253	-12.5457	down
P1121	164.084	6.453	1.20494	0.000388	3.80919	1.92948	up
P1131	914.493	4.701	1.77948	0.007064	0.457383	-1.12853	down
P1137	168.188	6.534	1.47851	0.0244629	3.10328	1.6338	up
P1139	877.896	5.941	1.71735	0.00682075	0.392418	-1.34954	down
P1177	343.177	4.955	2.03973	0.00119574	0.305238	-1.71199	down
P1179	258.111	1.233	1.57331	0.0155644	3.40478	1.76756	up
P1185	815.421	5.93	1.73586	0.00753068	0.00017768	-12.4584	down
P1190	169.12	2.081	2.13286	0.0043659	0.000132448	-12.8823	down
P1191	208.157	6.462	2.06389	0.000233672	2.87632e-05	-15.0854	down
P1210	184.1	5.411	2.10059	9.49539e-05	0.322286	-1.63359	down
P1216	296.199	6.896	1.47551	0.0191189	0.499432	-1.00164	down
P1229	878.507	5.938	1.74939	0.00530356	0.400742	-1.31925	down
P1239	878.049	5.933	1.70068	0.00738346	0.406502	-1.29867	down
P1248	204.124	2.906	2.10096	0.000306455	0.227282	-2.13744	down
P1289	307.215	6.998	2.15173	9.40976e-05	2.58744	1.37153	up
P1300	248.153	6.418	2.18907	9.0354e-05	0.282964	-1.82131	down
P1302	379.092	5.209	1.31328	0.00402749	0.230608	-2.11649	down
P1321	179.094	2.437	2.04571	0.000226713	3.50435e-05	-14.8005	down
P1327	186.079	5.614	1.64875	0.0234858	0.00170621	-9.19499	down
P1335	164.131	5.426	1.30667	0.00013275	0.242129	-2.04615	down
P1339	145.111	1.677	1.372	0.0340456	0.202096	-2.30688	down
P1346	342.219	8.327	1.74307	0.0115875	2.57445	1.36427	up
P1364	185.153	5.463	2.28775	2.8996e-07	0.143343	-2.80245	down
P1373	205.121	5.339	2.06	0.000244199	3.52596e-05	-14.7916	down
P1374	129.042	1.291	1.40326	0.0362845	2.10936	1.07681	up
P1386	113.048	1.421	1.84759	0.00322513	0.193243	-2.37151	down
P1404	354.241	7.958	1.44263	0.0463149	2.00581	1.00419	up
P1419	178.146	5.726	2.17628	2.94846e-05	0.292837	-1.77183	down
P1423	477.32	10.716	1.53057	0.0267118	2.09943	1.07	up
P1432	505.319	11.863	1.71961	0.0087731	3305.67	11.6907	up
P1441	170.085	5.564	2.38044	7.9486e-14	5.18522e-06	-17.5572	down
P1442	582.247	9.228	1.54844	0.0227807	3.25328	1.70189	up
P1446	218.105	5.173	2.09875	0.00019955	0.426728	-1.22861	down
P1451	177.09	2.671	2.05078	0.000278507	3.66959e-05	-14.734	down
P1454	380.303	9.014	1.74294	0.00828044	2648.38	11.3709	up
P1484	188.106	3.959	1.27373	0.0002245	0.204455	-2.29015	down
P1487	180.126	4.993	2.1239	0.000183159	0.343273	-1.54257	down
P1492	292.111	1.002	1.54816	0.0192148	2.1307	1.09133	up
P1497	296.064	1.957	1.09498	9.55659e-05	0.218734	-2.19275	down
P1525	430.243	5.202	2.03407	0.000363582	0.442589	-1.17596	down
P1547	268.168	6.294	1.64339	0.0063231	0.478779	-1.06257	down
P1559	144.069	4.932	2.24947	1.03645e-05	0.130343	-2.93962	down
P1565	201.115	5.979	2.07494	0.000198012	4.16248e-05	-14.5522	down
P1574	226.167	6.131	2.04422	0.000312559	4.37375e-05	-14.4808	down
P1575	188.095	5.224	2.05873	0.000254812	3.72701e-05	-14.7116	down
P1581	280.143	5.29	1.68204	0.00649492	0.000260962	-11.9039	down
P1582	175.111	4.952	2.26213	3.83126e-06	0.236972	-2.07721	down
P1606	951.312	5.934	1.76017	0.0046733	0.351478	-1.50849	down
P1611	220.085	2.677	1.38302	0.0472661	0.0032413	-8.26921	down
P1650	352.225	8.005	1.67527	0.00812866	2515.77	11.2968	up
P1660	416.162	6.153	1.42813	0.0377963	404.23	8.65903	up
P1729	368.256	7.846	1.75354	0.00777547	0.00024921	-11.9704	down
P1739	266.131	5.225	1.69123	0.00611843	0.00031585	-11.6285	down
P1777	426.231	8.351	1.72879	6.17102e-12	8.57838e-06	-16.8309	down
P1821	290.138	5.452	2.37653	1.8247e-15	8.65327e-06	-16.8183	down
P1905	426.23	8.761	1.23543	0.00437646	6.53545e-05	-13.9014	down
P1941	240.172	9.089	1.65782	0.00974751	2083.26	11.0246	up
P1952	381.288	10.304	1.67479	0.00947794	2376.66	11.2147	up
P1966	350.21	7.977	2.02211	0.000565327	9.65677e-05	-13.3381	down
P1977	275.188	6.011	1.57436	0.0144474	0.000456902	-11.0958	down
P1991	229.179	5.729	1.87348	0.0034922	0.394207	-1.34297	down
P2021	213.184	6.335	1.51097	0.0228859	0.000956019	-10.0307	down
P2049	262.114	5.53	2.04115	0.000318446	6.29052e-05	-13.9565	down
P2060	382.235	6.655	1.44616	0.0350002	0.0024472	-8.67465	down
P2083	176.059	5.576	1.68746	0.0093427	0.384331	-1.37958	down
P2085	266.163	6.177	1.87829	0.0038929	2.53014	1.33922	up
P2092	261.031	2.255	1.60942	0.0197409	0.000545267	-10.8407	down
P2093	358.214	10.239	1.6461	0.0101355	3036.28	11.5681	up
P2094	164.059	3.232	1.47511	0.0352481	0.00215251	-8.85976	down
P2117	204.09	5.089	1.58981	0.0109291	0.0721285	-3.79329	down
P2124	171.137	5.072	1.42545	0.0444789	0.295304	-1.75973	down
P2148	236.08	5.321	2.37552	9.48074e-15	1.48313e-05	-16.041	down
P2184	178.146	5.73	2.13969	9.31238e-05	0.382858	-1.38512	down
P2195	234.138	6.157	1.76936	0.00437663	0.272964	-1.87322	down
P2197	152.095	2.406	2.37605	1.08444e-13	6.55232e-06	-17.2196	down
P2198	81.0576	3.928	1.64485	0.0168289	0.000503423	-10.9559	down
P2217	217.142	1.109	1.56945	0.0164585	1798.53	10.8126	up
P2218	132.054	4.738	1.63952	0.00127842	9.70868e-05	-13.3304	down
P2244	197.147	5.292	2.01149	0.000479101	8.92038e-05	-13.4525	down
P2271	160.101	5.407	2.3775	5.29539e-15	1.18901e-05	-16.3599	down
P2284	287.196	2.257	1.58826	0.014865	2066.87	11.0132	up
P2285	202.11	5.299	2.21543	8.41337e-06	0.3065	-1.70604	down
P2305	361.283	8.812	1.48546	0.0489296	449.832	8.81324	up
P2323	285.136	9.564	2.38393	2.21491e-16	1.81894e-05	-15.7465	down
P2360	256.166	6.243	1.54953	0.0381428	0.00226741	-8.78474	down
P2362	542.278	11.454	1.75782	0.00994768	1932.17	10.916	up
P2372	136.052	10.623	1.65954	0.0104034	0.000620998	-10.6531	down
P2382	209.116	5.179	1.72047	0.00871622	1308.9	10.3541	up
P2395	330.28	9.844	1.43703	0.0284155	0.415105	-1.26845	down
P2398	175.111	5.074	1.91508	0.00100185	2.33579	1.22391	up
P2402	372.25	5.609	1.58216	0.0194049	0.000922112	-10.0828	down
P2484	201.172	6.662	1.75862	0.00895065	1752.74	10.7754	up
P2504	173.095	4.973	1.31055	0.00059855	0.186085	-2.42597	down
P2506	202.074	5.643	2.23825	1.56007e-05	0.21271	-2.23304	down
P2511	347.294	6.441	1.88457	0.00128486	0.468352	-1.09434	down
P2513	153.09	4.785	2.09336	0.000140623	0.398978	-1.32562	down
P2548	206.142	4.74	1.66321	0.00915456	1686.5	10.7198	up
P2565	352.225	7.673	1.75949	0.00466167	5342	12.3832	up
P2574	303.158	5.529	1.40435	0.0442464	315.777	8.30276	up
P2578	213.083	6.689	1.36446	0.0462877	252.624	7.98085	up
P2579	285.137	9.648	2.38112	4.36788e-17	1.80034e-05	-15.7614	down
P2588	204.09	5.088	1.60503	0.0202756	0.0753901	-3.72948	down
P2610	158.084	5.091	1.65089	0.0192737	4.32012	2.11107	up
P2628	143.073	5.309	1.07101	0.024325	9.16182	3.19563	up
P2630	202.216	1.011	1.61761	0.0126225	3.06063	1.61383	up
P2637	157.121	3.394	2.38344	2.16849e-15	3.34867e-06	-18.188	down
P2642	196.121	5.433	1.92417	0.00115543	0.363489	-1.46002	down
P2652	220.085	5.632	1.95234	0.00209574	0.112942	-3.14635	down
P2659	287.195	2.199	1.57641	0.0161986	1682.74	10.7166	up
P2673	71.0772	1.431	1.35947	0.0483179	269.761	8.07554	up
P2675	117.116	2.004	1.42862	0.0489994	0.00408397	-7.93581	down
P2676	346.128	5.023	1.4065	0.0497057	0.00463589	-7.75294	down
P2687	387.298	8.024	1.93007	0.000794242	0.381046	-1.39196	down
P2690	239.162	2.272	1.40262	0.0443761	374.072	8.54717	up
P2697	270.172	5.405	2.37281	1.09173e-12	8.32889e-06	-16.8734	down
P2702	174.068	7.817	1.70341	0.0109283	1390.7	10.4416	up
P2725	248.057	4.674	1.46277	0.0489176	0.00428041	-7.86803	down
P2731	950.802	5.979	1.53626	0.0290903	0.00110318	-9.82412	down
P2732	460.283	10.482	1.63161	0.0117585	2.52953	1.33887	up
P2735	877.742	5.991	1.82594	0.00397151	0.000145126	-12.7504	down
P2736	267.13	1.165	1.57004	0.0208676	0.00152272	-9.35913	down
P2768	236.08	5.344	2.37553	1.03613e-14	1.48335e-05	-16.0408	down
P2781	179.058	1.801	1.47324	0.0436084	567.048	9.14733	up
P2784	327.944	1.986	1.49683	0.0284008	3.24852	1.69978	up
P2785	488.328	12.04	1.40198	0.0458775	437.338	8.77261	up
P2787	113.999	1.919	1.72674	0.0224083	0.000816819	-10.2577	down
P2794	343.179	11.504	1.92149	0.00281711	3.77558	1.9167	up
P2798	263.131	11.238	1.78164	0.00897125	3.44169	1.78312	up
P2806	262.062	3.721	1.40215	0.0452579	675.833	9.40052	up
P2828	287.116	5.649	1.80722	0.00649923	3853.79	11.9121	up
P2834	343.179	11.204	1.75092	0.0109703	3.34494	1.74198	up
P2845	418.272	8.066	1.39554	0.0449751	540.913	9.07925	up
P2846	308.272	11.048	1.39962	0.0448187	673.813	9.39621	up
P2864	702.213	6.47	2.36087	6.55142e-11	152799	17.2213	up
P2871	427.179	9.831	1.31267	0.0472302	400.629	8.64612	up
P2885	528.212	11.269	1.63678	0.0201602	822.799	9.6844	up
P2913	164.094	5.807	1.77246	0.00917473	0.00028585	-11.7725	down
P2918	374.318	10.872	1.40058	0.0447172	587.893	9.19941	up
P2923	280.24	10.16	1.40144	0.0447295	592.254	9.21007	up
P2925	190.111	7.492	1.39682	0.0461384	401.655	8.64981	up
P2929	452.125	5.604	1.52083	0.0389182	432.934	8.758	up
P2963	324.184	7.311	2.38302	9.83095e-16	6.82875e-06	-17.1599	down
P2973	341.2	6.716	1.72026	0.00886037	2511.78	11.2945	up
P2975	324.137	10.935	1.72314	0.010111	2028.88	10.9865	up
P2985	446.303	9.121	1.39796	0.0446698	406.671	8.66772	up
P2991	191.106	4.829	1.40256	0.044589	420.721	8.71672	up
P3001	394.271	8.605	2.01223	0.000477937	5.88372e-05	-14.0529	down
P3014	554.245	5.549	2.38089	4.82132e-14	78977.7	16.2692	up
P3026	329.198	6.302	2.38122	2.32976e-14	1.08623e-05	-16.4903	down
P3034	276.078	4.601	1.35457	0.0467772	413.481	8.69168	up
P3040	330.241	7.464	2.00625	0.000584052	14239.8	13.7976	up
P3046	465.18	4.97	2.00882	0.000522024	14922.2	13.8652	up
P3047	325.298	10.667	1.40063	0.0444833	401.494	8.64923	up
P3053	235.07	3.558	1.40325	0.0445669	449.43	8.81195	up
P3069	955.794	5.936	1.63497	0.0106323	0.000354528	-11.4618	down
P3087	218.105	3.652	1.66293	0.0104176	0.000393276	-11.3122	down
P3090	186.089	3.747	1.40299	0.0444766	421.184	8.71831	up
P3091	184.1	5.654	2.38162	2.81748e-14	6.79335e-06	-17.1674	down
P3097	880.889	5.961	1.27289	0.0250663	0.000716647	-10.4464	down
P3105	342.147	11.249	1.6303	0.0104942	2292.11	11.1625	up
P3109	442.307	9.37	1.40302	0.0445127	371.721	8.53807	up
P3111	885.58	5.929	1.63472	0.0106171	0.00030866	-11.6617	down
P3122	236.036	2.017	1.3999	0.0444657	332.834	8.37866	up
P3126	360.115	4.909	1.40303	0.0443962	339.631	8.40782	up
P3129	350.209	7.909	1.40263	0.0235519	992.79	9.95534	up
P3137	281.142	6.913	1.40847	0.0497786	0.00289156	-8.43394	down
P3146	368.255	9.208	1.40344	0.0443674	360.345	8.49324	up
P3157	350.21	8.418	1.49103	0.0497729	349.194	8.44789	up
P3172	163.081	1.924	2.37897	1.11816e-13	1.23999e-05	-16.2993	down
P3190	172.074	6.545	1.31686	0.0489229	470.416	8.87779	up
P3202	273.208	6.275	2.01216	0.000486073	6.38752e-05	-13.9344	down
P3203	223.055	1.934	1.40332	0.0443773	367.647	8.52218	up
P3215	162.068	8.358	1.75697	0.00159518	9121.9	13.1551	up
P3221	223.06	1.934	1.39674	0.0447585	316.023	8.30388	up
P3222	130.053	2.098	2.37879	3.93541e-15	1.02713e-05	-16.571	down
P3231	254.261	9.06	1.40147	0.0444416	393.335	8.61962	up
P3236	330.24	7.441	1.27101	0.0488086	299.182	8.22488	up
P3255	294.125	11.232	1.53772	0.0350048	419.315	8.71189	up
P3265	197.115	2.148	1.40777	0.0497115	0.00307604	-8.34471	down
P3271	468.322	9.95	1.40373	0.0445215	395.233	8.62656	up
P3286	356.154	7.598	2.03332	0.000563112	6.03906e-05	-14.0153	down
P3289	256.074	11.245	1.54313	0.0341105	431.158	8.75207	up
P3294	236.153	6.21	1.49134	0.0490151	0.00342746	-8.18865	down
P3306	312.219	6.034	1.69185	0.0101172	0.00057852	-10.7553	down
P3316	411.337	9.557	1.40009	0.0445584	429.69	8.74715	up
P3322	374.208	7.571	1.61484	0.0173343	1946.51	10.9267	up
P3337	547.326	10.577	1.94469	0.000608483	6.99638e-05	-13.803	down
P3343	285.168	5.424	2.03545	0.000560295	6.98134e-05	-13.8061	down
P3346	162.031	5.551	1.63218	0.0104411	2206.11	11.1073	up
P3349	249.031	1.968	1.39805	0.0446847	325.25	8.34541	up
P3351	230.143	5.803	2.03389	0.000566651	6.63197e-05	-13.8802	down
P3356	362.162	4.623	2.03519	0.000537334	8.10165e-05	-13.5914	down
P3363	136.1	4.729	1.75518	0.0102047	0.000486603	-11.005	down
P3369	198.105	6.192	2.38251	7.32749e-16	1.26024e-05	-16.2759	down
P3373	953.218	5.952	1.63485	0.0106155	0.000302994	-11.6884	down
P3381	211.132	5.173	2.03467	0.000561452	8.26676e-05	-13.5623	down
P3385	342.147	8.654	2.05924	0.000391109	11617.7	13.504	up
P3389	292.168	8.883	1.48965	0.0499671	354.263	8.46868	up
P3392	326.318	10.497	1.45227	0.01988	0.000492153	-10.9886	down
P3408	233.051	7.087	1.40592	0.0444945	329.022	8.36204	up
P3411	226.193	10.384	1.62905	0.00944758	1870.75	10.8694	up
P3416	163.085	2.936	1.75591	0.0101969	0.00049814	-10.9712	down
P3418	234.234	9.12	1.70284	0.0159481	2272.46	11.15	up
P3419	806.57	10.722	1.87398	0.00129189	6.37534e-05	-13.9371	down
P3422	956.044	5.946	1.63692	0.0106328	0.00038095	-11.3581	down
P3432	364.108	11.205	1.55537	0.0322036	428.796	8.74415	up
P3462	188.015	5.567	1.40195	0.0443084	310.349	8.27775	up
P3465	535.364	11.025	1.40544	0.0441223	275.619	8.10653	up
P3473	290.162	6.273	1.40272	0.0499906	0.0036681	-8.09075	down
P3474	408.335	10.25	1.74716	0.00804799	2362.2	11.2059	up
P3485	176.105	4.595	1.96903	4.72309e-16	1.11854e-05	-16.448	down
P3488	744.462	9.95	1.4027	0.0443682	360.545	8.49404	up
P3500	417.257	5.248	1.36227	0.0497246	0.00414234	-7.91534	down
P3513	342.146	5.822	1.40356	0.0442288	309.978	8.27602	up
P3515	197.152	5.704	2.38205	2.35269e-15	5.16847e-06	-17.5618	down
P3517	232.157	6.011	1.40563	0.0498404	0.0037626	-8.05406	down
P3518	523.258	11.249	1.62971	0.0105143	1756.53	10.7785	up
P3521	181.073	2.812	2.02136	0.000545487	8.30096e-05	-13.5564	down
P3542	185.01	3.168	1.47914	0.0492995	0.00345512	-8.17705	down
P3543	86.0364	6.119	1.40234	0.0498915	0.00411512	-7.92485	down
P3544	231.137	5.832	2.38264	2.26782e-14	1.17841e-05	-16.3728	down
P3554	718.179	6.431	1.63436	0.00894594	1883.31	10.8791	up
P3558	297.148	6.662	1.40789	0.0497169	0.00367598	-8.08766	down
P3560	144.069	5.247	2.38133	5.23379e-15	1.21706e-05	-16.3262	down
P3561	274.124	6.109	1.75758	0.0102168	0.000622692	-10.6492	down
P3576	177.126	4.739	2.06228	0.000531538	9.77227e-05	-13.3209	down
P3583	150.079	5.334	1.52168	0.014851	2243.9	11.1318	up
P3584	162.068	11.515	1.56194	0.0310657	400.355	8.64514	up
P3593	408.251	7.081	1.65787	0.0104315	0.000523418	-10.8997	down
P3601	815.047	5.992	1.70544	0.0102963	0.000427642	-11.1913	down
P3636	768.463	9.939	1.4034	0.0442435	312.973	8.2899	up
P3638	215.134	6.152	2.38059	6.49187e-16	1.32889e-05	-16.1994	down
P3648	902.454	8.664	1.49312	0.0482385	292.589	8.19273	up
P3657	216.121	4.489	1.75959	0.0101874	0.000656341	-10.5733	down
P3662	245.142	6.931	1.40438	0.0456491	281.81	8.13858	up
P3666	183.079	6.768	1.3114	0.0463795	247.578	7.95174	up
P3672	469.253	4.891	1.30793	0.0464978	330.876	8.37015	up
P3678	393.17	5.599	2.0636	0.000527725	8.84956e-05	-13.464	down
P3691	944.587	10.126	1.40541	0.0443042	241.604	7.9165	up
P3696	352.225	7.653	1.99943	0.000583941	12812.5	13.6453	up
P3697	189.067	4.42	2.03341	0.000560792	8.25167e-05	-13.565	down
P3702	341.2	6.874	1.40182	0.0456525	275.383	8.1053	up
P3706	401.278	6.83	1.58985	0.0191056	0.000573853	-10.767	down
P3728	364.107	11.497	1.81363	0.0066332	2094.35	11.0323	up
P3733	601.185	2.326	1.4038	0.0442152	286.959	8.1647	up
P3736	91.0174	1.871	1.40494	0.0440029	245.287	7.93832	up
P3739	528.213	11.253	1.6368	0.0201571	822.876	9.68453	up
P3740	144.102	1.956	1.66261	0.0103914	0.000581844	-10.7471	down
P3757	256.155	5.728	2.03265	0.000566746	0.000112802	-13.1139	down
P3761	368.256	7.887	1.77968	0.00639724	0.000252103	-11.9537	down
P3779	227.2	6.749	2.38074	6.09477e-17	1.46188e-05	-16.0618	down
P3781	377.193	5.025	1.40626	0.0441569	270.831	8.08125	up
P3803	177.09	4.442	2.38169	1.42337e-16	1.15803e-05	-16.398	down
P3806	378.241	8.948	1.36323	0.0464092	309.371	8.27319	up
P3826	506.222	11.251	1.61728	0.0235443	655.626	9.35673	up
P3829	399.327	9.686	1.40025	0.0445767	438.721	8.77716	up
P3843	146.084	5.13	1.96968	0.000547933	7.82005e-05	-13.6425	down
P3849	302.224	7.198	1.40469	0.0441714	293.345	8.19646	up
P3855	354.184	11.483	1.78602	0.00758109	1819.12	10.829	up
P3874	216.09	4.765	1.66074	3.31343e-12	1.10293e-05	-16.4683	down
P3887	191.069	5.213	2.03077	0.000563236	9.32027e-05	-13.3893	down
P3888	354.24	8.17	2.00912	0.000814417	16845.4	14.0401	up
P3892	145.053	2.278	1.67694	0.00817834	0.000528109	-10.8869	down
P3895	274.169	6.609	1.40656	0.0496559	0.00297258	-8.39407	down
P3910	372.213	2.176	1.40683	0.0440248	238.066	7.89522	up
P3946	459.15	5.186	1.40713	0.0440442	222.334	7.79658	up
P3959	212.151	5.417	1.40387	0.0442641	330.449	8.36828	up
P3965	256.122	6.801	1.63568	0.0106581	0.000826511	-10.2407	down
P3966	403.279	9.698	1.40509	0.0440874	240.12	7.90761	up
P3967	402.123	4.734	1.75955	0.00941589	1527.76	10.5772	up
P3976	102.068	5.789	1.4052	0.048983	0.00309387	-8.33637	down
P3980	272.152	5.661	2.06083	0.000525223	0.000117615	-13.0536	down
P3988	282.192	5.55	1.4038	0.0497772	0.00459813	-7.76474	down
P3992	304.095	6.458	1.4044	0.0440298	242.869	7.92403	up
P3993	123.046	6.428	1.63525	0.00888865	1391.08	10.442	up
P4018	634.368	5.76	1.40527	0.0442312	305.778	8.25634	up
P4027	234.172	5.658	1.6886	0.0100748	0.000707716	-10.4645	down
P4054	87.0147	1.386	1.40273	0.0440252	228.647	7.83698	up
P4055	194.167	7.576	1.30964	0.046371	223.931	7.80691	up
P4056	167.105	5.331	1.47691	0.0493232	0.00420133	-7.89494	down
P4073	453.137	4.887	1.40541	0.0440055	244.96	7.9364	up
P4112	311.171	1.162	1.35299	0.0465859	191.801	7.58347	up
P4117	345.267	11.821	1.40638	0.0440478	245.577	7.94003	up
P4120	547.326	10.572	1.51946	0.0242903	0.00254613	-8.61748	down
P4132	235.07	3.558	1.40325	0.0445667	449.427	8.81194	up
P4133	108.069	5.332	1.96536	0.000554106	15078.5	13.8802	up
P4140	260.117	5.708	1.50279	0.0467021	0.00476632	-7.71291	down
P4148	428.261	4.89	2.03932	0.00187626	0.000178969	-12.448	down
P4156	176.032	6.473	1.40442	0.0439826	227.961	7.83264	up
P4159	130.042	5.402	2.0021	0.00052697	15331.3	13.9042	up
P4163	240.102	5.123	1.69008	0.0100623	0.000733207	-10.4135	down
P4166	271.188	6.252	1.34687	0.00547541	0.000237031	-12.0426	down
P4209	441.381	11.105	1.40431	0.0442749	312.908	8.28959	up
P4211	162.043	2.117	1.75672	0.0101765	0.00081251	-10.2653	down
P4248	342.147	11.248	1.63637	0.0105384	1858.51	10.8599	up
P4256	150.068	11.484	2.00559	0.000518178	6381.39	12.6397	up
P4312	834.216	11.551	1.483	0	0.482029	-1.05281	down
P4326	363.125	4.841	1.37151	0.000494018	6.19495	2.63109	up
P4330	55.0489	1.923	1.2592	0.00682302	0.000147153	-12.7304	down
P4339	226.132	5.499	1.96893	0	16	4	up
P4346	280.134	6.782	2.09313	0	16	4	up
P4364	217.121	5.596	1.405	1.33567e-10	3.61602e-06	-18.0772	down
P4368	198.116	5.81	2.03406	2.96971e-14	7.29624e-06	-17.0644	down
P4371	203.106	4.597	2.04566	0.000313026	5.20249e-05	-14.2304	down
P4377	113.059	5.714	2.06087	0.00142263	8.92868e-05	-13.4512	down
P4385	198.116	5.834	1.047	1.80542e-10	9.43567e-06	-16.6934	down
P4386	198.116	5.732	1.63573	1.16989e-11	9.95762e-06	-16.6158	down

## Sheet: Table S5
Table S5 SDMs of NEG in ZB vs ZR group
Index	Mass	RT	VIP	p-value	Fold.Change	Log2FC	Type
N0001	268.08	4.513	1.19688	0.0191657	0.461992	-1.11406	down
N0003	244.04	8.387	1.48938	0.00153917	2.92852	1.55017	up
N0004	340.115	6.447	1.55732	0.00125152	3.87698	1.95493	up
N0007	366.142	4.679	1.31427	0.00720726	0.452792	-1.14308	down
N0011	136.038	4.549	1.41009	0.00316011	0.473078	-1.07985	down
N0012	258.052	4.593	1.20223	0.0186142	0.490185	-1.0286	down
N0016	403.111	6.455	1.40158	0.00902726	2.34663	1.23059	up
N0019	794.061	2.217	1.05848	0.0457924	0.382247	-1.38742	down
N0021	326.191	11.411	1.43187	0.00827611	2.97525	1.57301	up
N0023	271.055	4.551	1.2503	0.0136558	0.465266	-1.10387	down
N0028	380.019	6.477	1.60019	0.000561551	4.20434	2.07188	up
N0034	964.413	5.199	1.28924	0.0151331	0.310439	-1.68762	down
N0038	346.25	9.614	1.17938	0.0200015	3.00418	1.58697	up
N0039	310.119	4.748	1.29688	0.00987745	2.45858	1.29782	up
N0046	453.038	1.48	1.22246	0.0154419	2.10658	1.0749	up
N0049	309.064	1.545	1.33028	0.00633316	2.30721	1.20615	up
N0053	352.224	8.264	1.45113	0.0020777	3.21526	1.68494	up
N0055	149.06	6.476	1.55668	0.00133766	3.37133	1.75332	up
N0061	616.151	4.929	1.27914	0.00433997	0.405408	-1.30255	down
N0067	125.084	4.94	1.25356	0.0165856	2028.94	10.9865	up
N0068	788.365	4.671	1.25853	0.0258486	0.460622	-1.11835	down
N0071	460.065	6.476	1.61833	0.000404681	3.20916	1.6822	up
N0076	353.07	4.948	1.6235	2.58822e-05	0.352661	-1.50364	down
N0083	152.047	6.372	1.51692	0.000798463	2.38037	1.25118	up
N0085	487.162	5.052	1.2042	0.0260464	2.16222	1.11251	up
N0091	178.026	6.362	1.49608	0	16	4	up
N0092	189.959	7.783	1.25979	0.0153836	2375.63	11.2141	up
N0095	176.032	6.478	1.76655	1.16913e-14	77993.4	16.2511	up
N0100	702.212	6.478	1.25407	0.0101057	2044.39	10.9975	up
N0103	439.222	9.145	1.49503	6.7429e-14	46652.2	15.5097	up
N0106	222.089	8.256	1.25994	0.0156071	2127.45	11.0549	up
N0111	464.979	6.483	1.25376	0.0100817	1997.36	10.9639	up
N0114	376.225	9.151	1.25921	0.0109594	1376.11	10.4264	up
N0116	191.956	7.766	1.49414	0.000573088	10476.1	13.3548	up
N0120	451.039	4.948	1.52317	0.000277461	9.29442e-05	-13.3933	down
N0128	500.957	6.468	1.25371	0.0100828	1486.74	10.5379	up
N0131	516.062	2.118	1.02453	0.0489257	208.628	7.70479	up
N0134	466.978	6.478	1.11927	0.00462787	2.15944	1.11066	up
N0136	311.128	11.194	1.26146	0.0112381	1416.19	10.4678	up
N0138	422.118	6.48	1.25421	0.0101033	1406.85	10.4582	up
N0140	502.954	6.466	1.25413	0.010084	1377.42	10.4278	up
N0148	562.238	5.116	1.56126	0.000505321	5.83297e-05	-14.0654	down
N0149	587.149	4.579	1.20923	0.0205449	0.000636378	-10.6178	down
N0154	278.126	5.928	1.11819	0.030026	0.00223319	-8.80668	down
N0155	705.368	6.454	1.76584	2.02225e-13	1.04244e-05	-16.5497	down
N0157	534.163	5.039	1.47795	0.000559611	8.01347e-05	-13.6072	down
N0158	359.169	4.874	1.09719	0.0329232	0.00227925	-8.77723	down
N0159	109.027	4.548	1.2973	0.00970643	0.00049659	-10.9757	down
N0166	618.336	6.728	1.5651	0.000495171	8.10623e-05	-13.5906	down
N0167	410.986	4.548	1.1215	0.0465824	0.00338818	-8.20528	down
N0178	582.19	4.714	1.14843	0.0464395	0.00352015	-8.15015	down
N0181	164.022	4.741	1.76961	2.30604e-15	1.41445e-05	-16.1094	down
N0184	242.08	6.44	1.48384	0.00061166	0.000119043	-13.0362	down
N0188	184.109	8.292	1.23712	0.0154408	0.0006988	-10.4828	down
N0197	305.137	4.939	1.20736	0	0.405799	-1.30116	down
N0201	178.062	6.736	1.01259	5.80208e-10	82204.3	16.3269	up

## Sheet: Table S6
Table S6 Pathway analysis of POS in ZB vs ZR group
Pathway names	Total	Hits	P value	-logP	Impact
Glycerophospholipid metabolism	28	3	0.091394	2.3926	0.259
Ubiquinone and other terpenoid-quinone biosynthesis	3	1	0.11212	2.1882	0
beta-Alanine metabolism	16	2	0.12554	2.0751	0
Phenylalanine, tyrosine and tryptophan biosynthesis	4	1	0.14668	1.9195	0.5
Linoleic acid metabolism	7	1	0.24263	1.4162	0
Glutathione metabolism	26	2	0.26772	1.3178	0.01113
alpha-Linolenic acid metabolism	9	1	0.30063	1.2019	0
Arachidonic acid metabolism	31	2	0.34091	1.0761	0
Phenylalanine metabolism	11	1	0.35427	1.0377	0
Arginine and proline metabolism	43	2	0.50483	0.68353	0.02407
Porphyrin and chlorophyll metabolism	27	1	0.66047	0.41481	0.05837
Tryptophan metabolism	39	1	0.79145	0.23389	0.13751
Tyrosine metabolism	44	1	0.83001	0.18632	0.13743
Purine metabolism	66	1	0.93152	0.070941	0.00252
Aminoacyl-tRNA biosynthesis	67	1	0.93431	0.067943	0

## Sheet: Table S7
Table S7 Pathway analysis of NEG in ZB vs ZR group
Pathway names	Total	Hits	P value	-logP	Impact
Purine metabolism	66	2	0.068868	2.6756	0.01287
Arachidonic acid metabolism	31	1	0.19059	1.6576	0
